# Supplementary material for: Tuning the Nucleophilicity and Electrophilicity of Group 10 Elements through Substituent Effects: A DFT Study
Source: MDPI journal article supplement (doi:10.3390/ijms242115597), 2023-10-26
Supplement: s1 [file s1]

# Tuning the nucleophilicity and electrophilicity of Group 10 elements through substituent effects: A DFT study

Sergi Burguera<sup>1</sup>, Antonio Bauzá<sup>1</sup> and Antonio Frontera<sup>1,\*</sup>

<sup>1</sup>Departament de Química, Universitat de les Illes Balears, Crta de Valldemossa Km, 7.5, 07122 Palma de mallorca (Balears), SPAIN.

\*Correspondence: [toni.frontera@uib.es](mailto:toni.frontera@uib.es)

## Table of contents:

|                                                                     |              |
|---------------------------------------------------------------------|--------------|
| Supplementary Figure 1 (Figure S1)                                  | Page 2       |
| Supplementary Figure 2 (Figure S2)                                  | Page 3       |
| Supplementary Figure 3 (Figure S3)                                  | Page 4       |
| Supplementary Figure 4 (Figure S4)                                  | Page 5       |
| Supplementary Figure 5 (Figure S5)                                  | Page 6       |
| Supplementary Figure 6 (Figure S6)                                  | Page 7       |
| Cartesian coordinates for the MEP surface calculations              | Pages 8-39   |
| Cartesian coordinates of the optimized pyridine dimers              | Pages 40-84  |
| Cartesian coordinates of the optimized pentafluoriodobenzene dimers | Pages 85-130 |

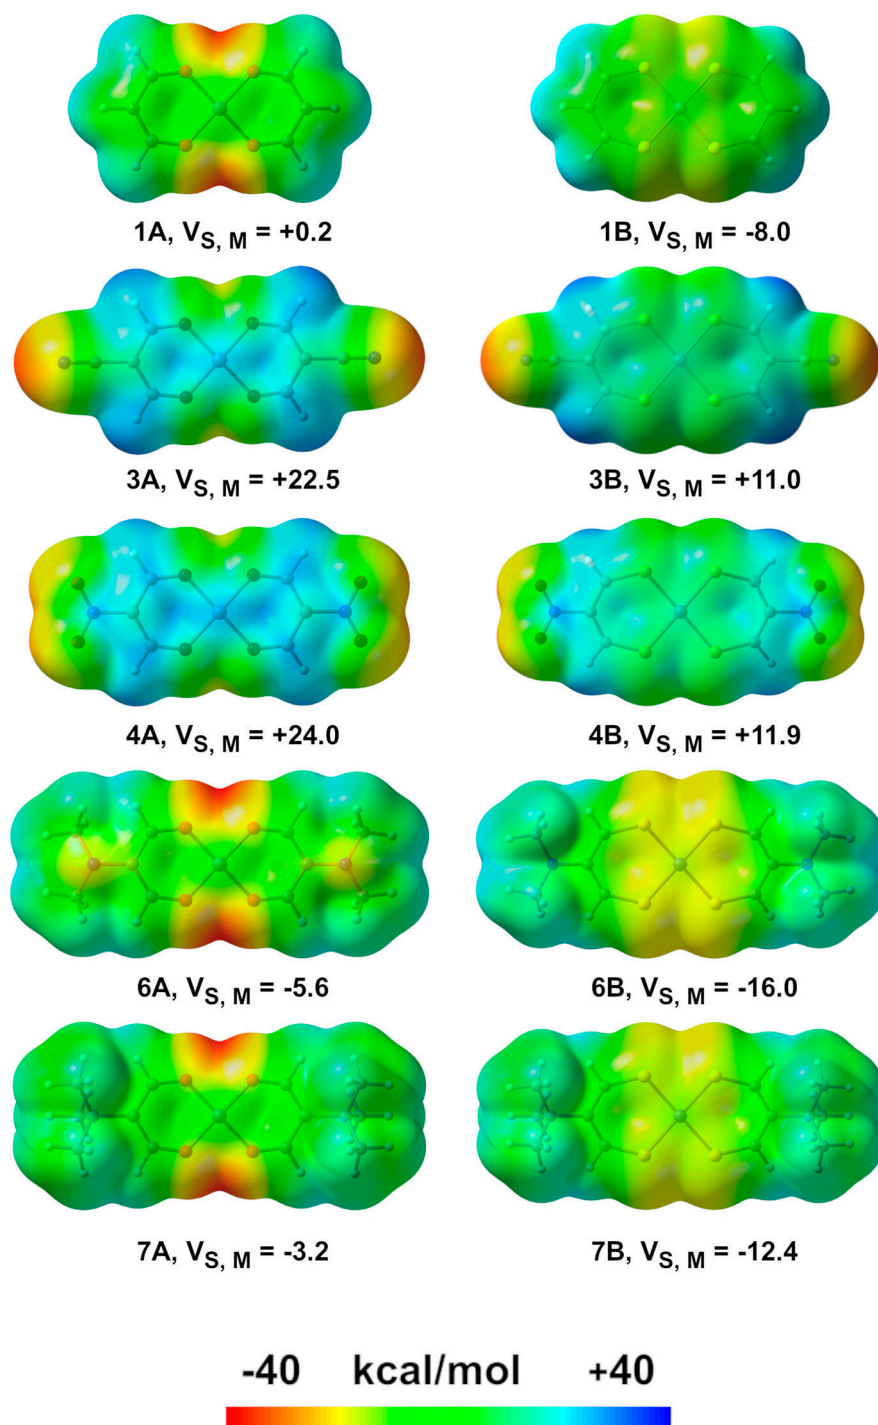

**Figure S1.** Molecular electrostatic potential surfaces of all the remaining Ni<sup>II</sup> monomers. Isosurface = 0.001 a.u

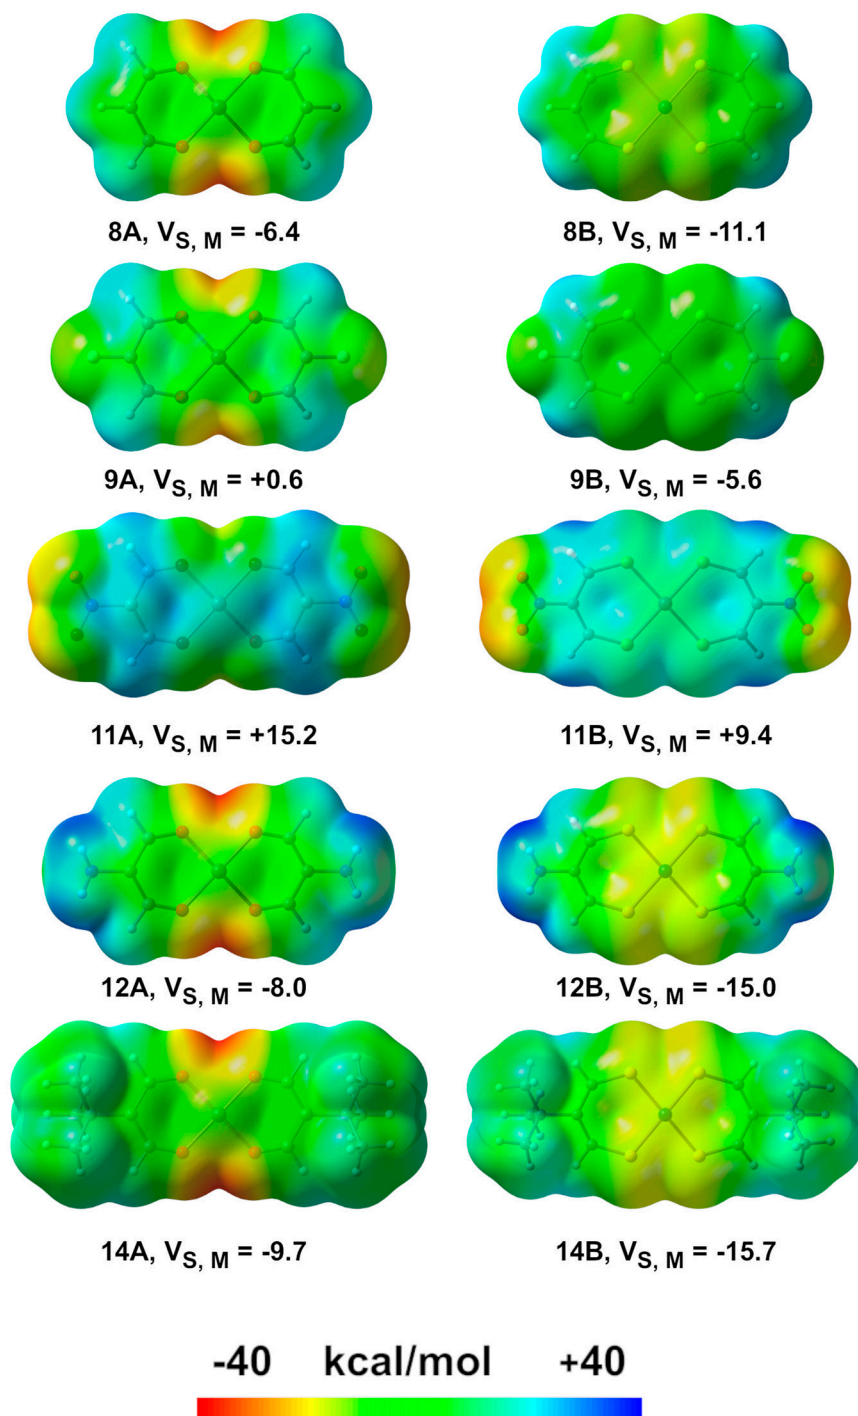

**Figure S2.** Molecular electrostatic potential surfaces of all the remaining Pd<sup>II</sup> monomers. Isosurface = 0.001 a.u

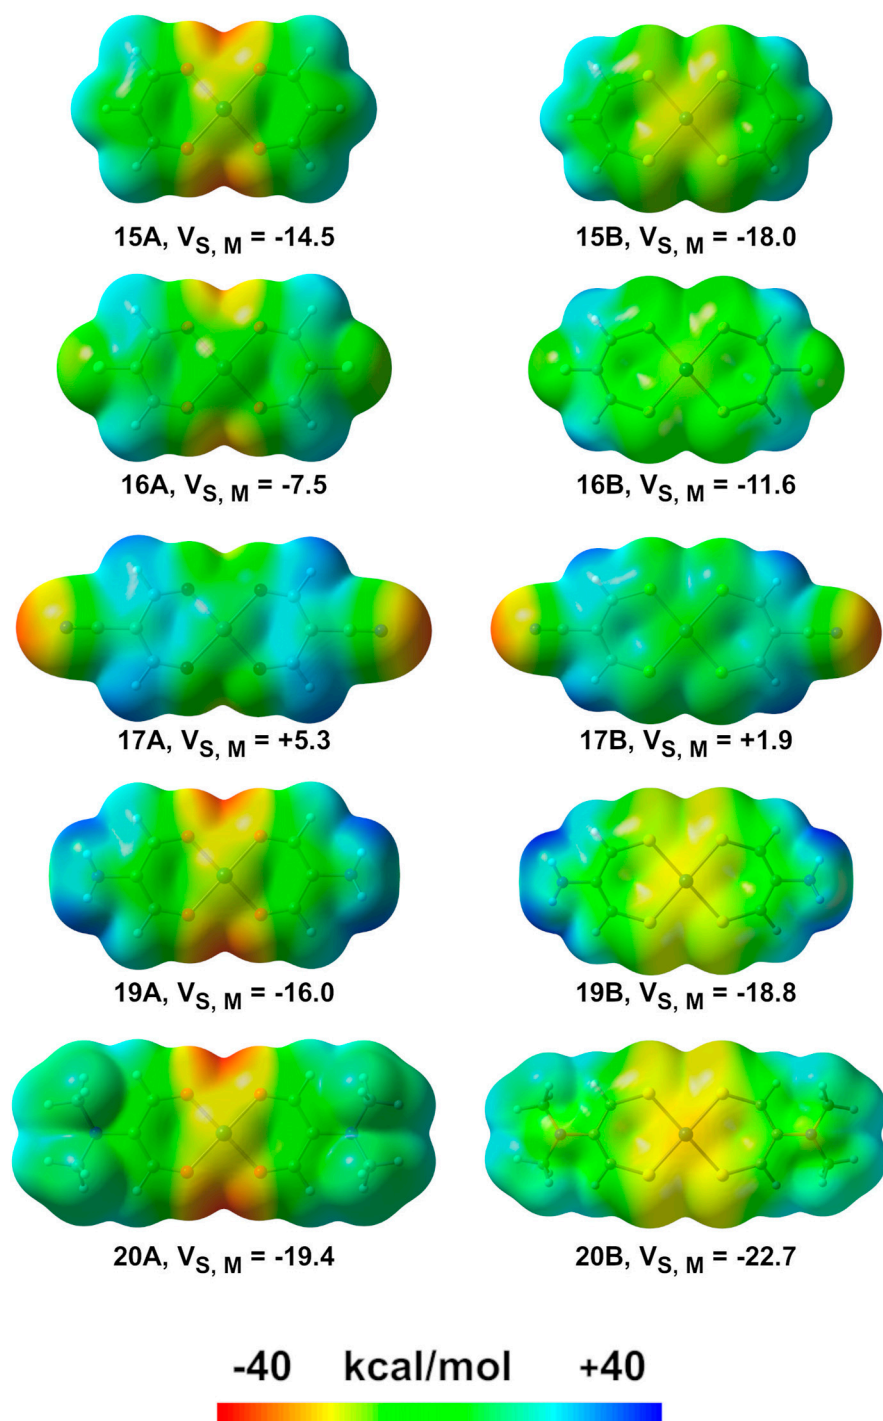

**Figure S3.** Molecular electrostatic potential surfaces of all the remaining Pt<sup>II</sup> monomers. Isosurface = 0.001 a.u.

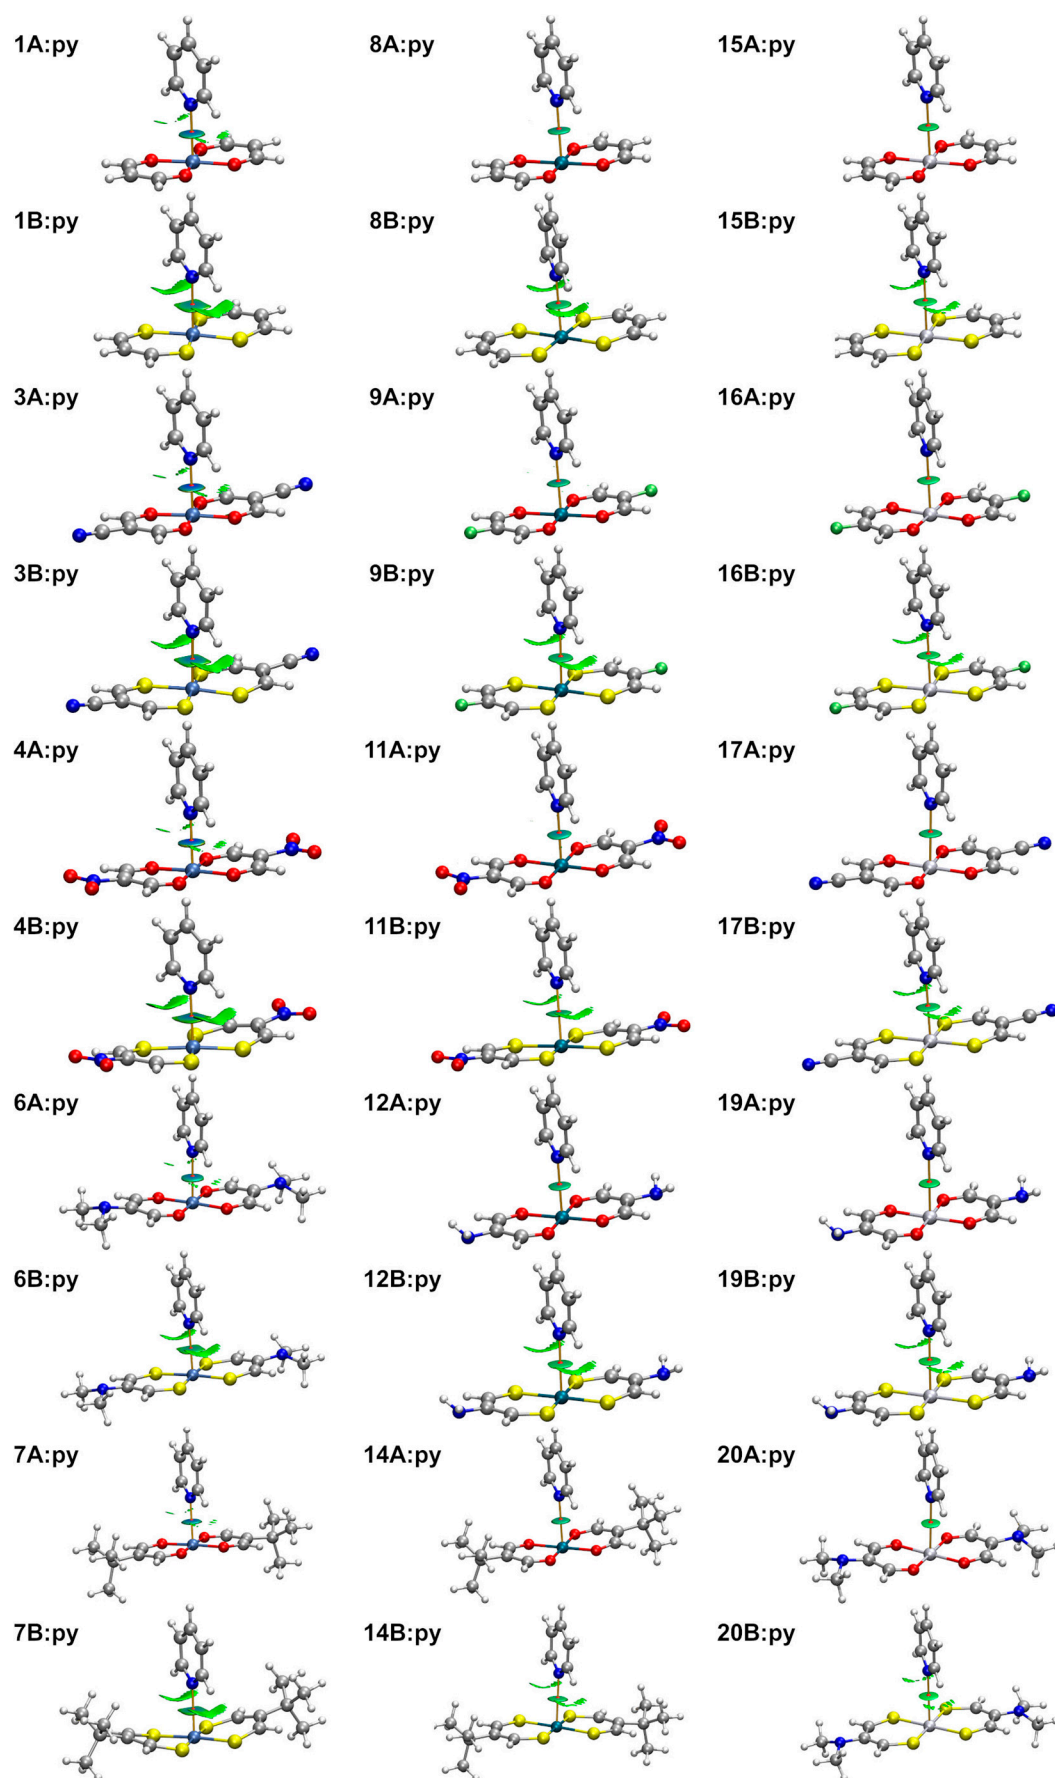

**Figure S4.** AIM/NCIplot of all the remaining pyridine dimers. The settings are the same as in Figure 2.



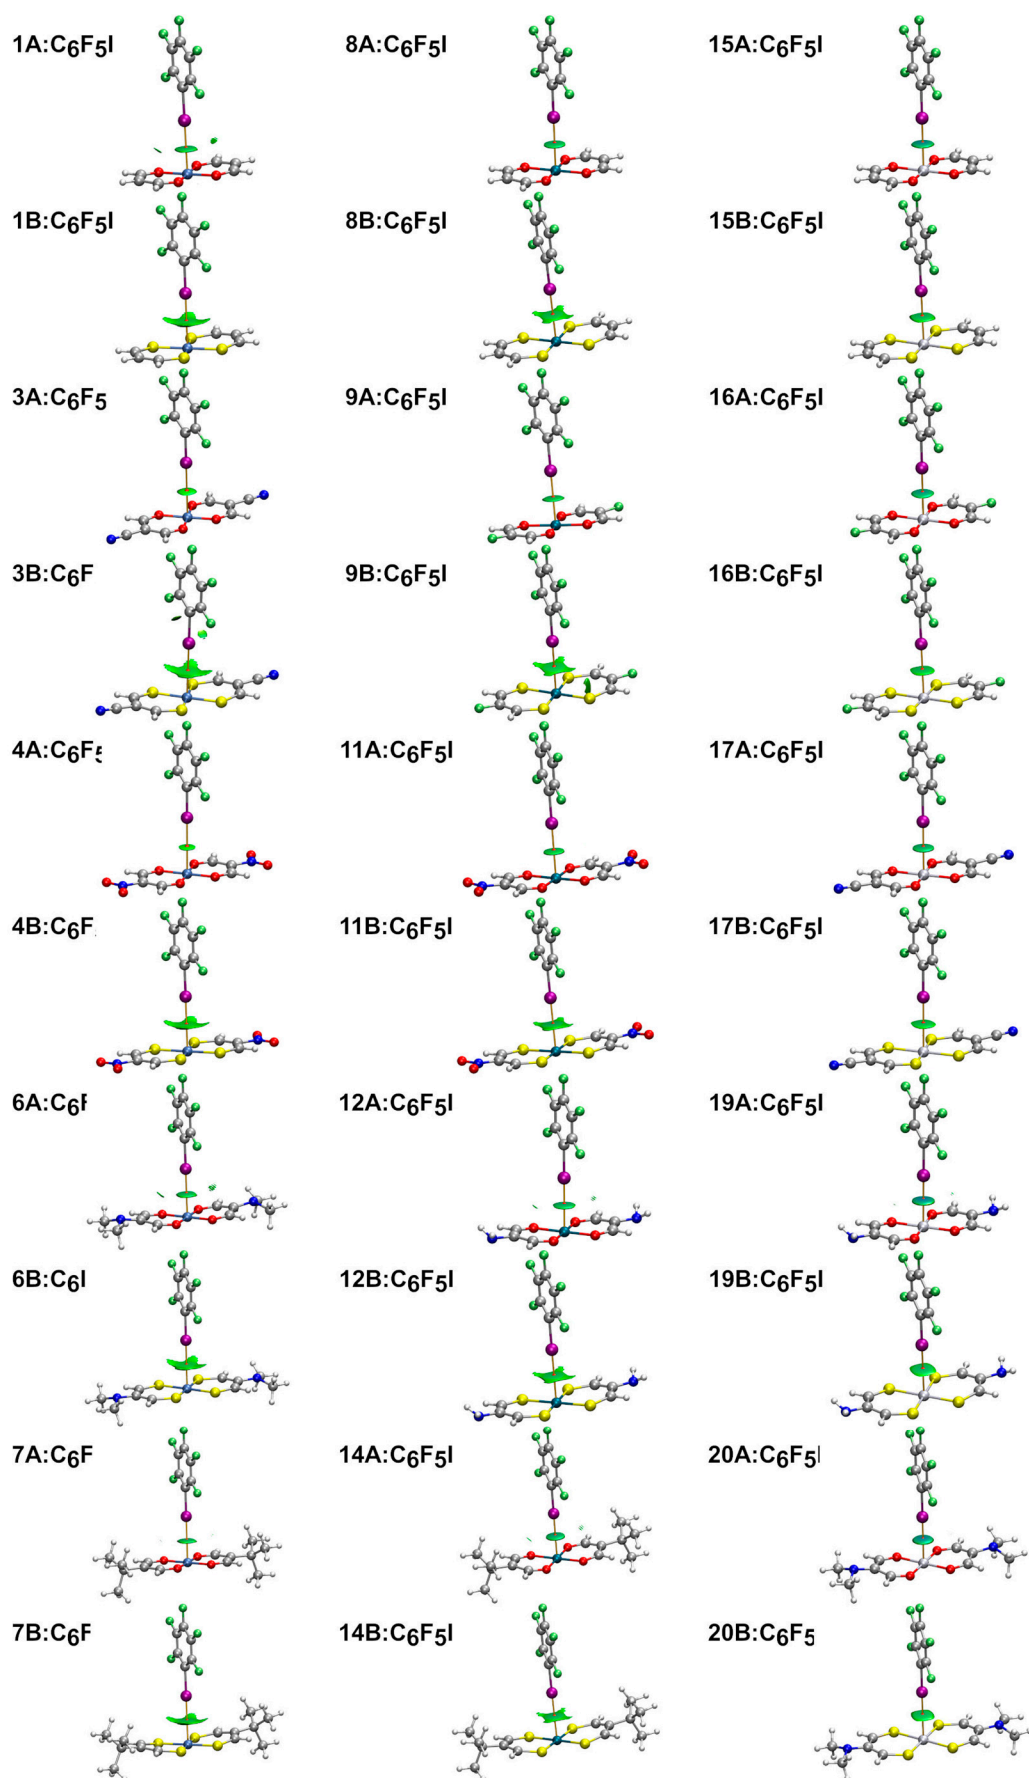

**Figure S5.** AIM/NCIplot of all the remaining pentafluoriodobenzene dimers. The settings are the same as in Figure 3.

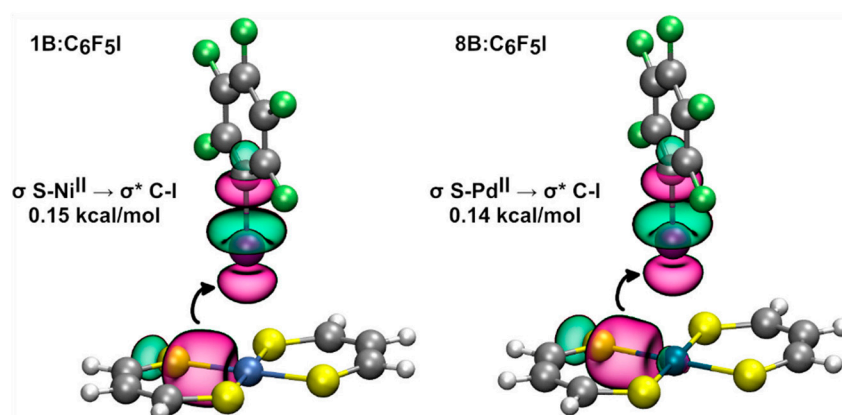

**Figure S6.** Alternative donor for the NBO analyses for the B set, pentafluoriodobenzene dimers. Only one of the four  $\sigma$  S-M<sup>II</sup> donor orbitals are shown. Settings are the same as in Figure 5.

## Cartesian coordinates for the MEP surface calculations

### 1A

|    |            |            |            |
|----|------------|------------|------------|
| C  | 2.5023126  | -1.2071188 | 0.0000000  |
| H  | 3.0850711  | -2.1355893 | 0.0000000  |
| C  | 3.1898628  | 0.0000000  | 0.0000000  |
| H  | 4.2704195  | 0.0000000  | 0.0000000  |
| C  | 2.5023126  | 1.2071188  | 0.0000000  |
| H  | 3.0850711  | 2.1355893  | -0.0000000 |
| O  | 1.2533403  | -1.3659444 | -0.0000000 |
| O  | 1.2533403  | 1.3659444  | 0.0000000  |
| C  | -2.5023126 | 1.2071188  | -0.0000000 |
| H  | -3.0850711 | 2.1355893  | 0.0000000  |
| C  | -3.1898628 | 0.0000000  | 0.0000000  |
| H  | -4.2704195 | -0.0000000 | 0.0000000  |
| C  | -2.5023126 | -1.2071188 | 0.0000000  |
| H  | -3.0850711 | -2.1355893 | 0.0000000  |
| O  | -1.2533403 | 1.3659444  | -0.0000000 |
| O  | -1.2533403 | -1.3659444 | 0.0000000  |
| Ni | 0.0000000  | 0.0000000  | 0.0000000  |

### 1B

|   |            |            |            |
|---|------------|------------|------------|
| C | 3.0436892  | 0.0000000  | -1.2301293 |
| H | 3.6899236  | 0.0000000  | -2.1055644 |
| C | 3.6742493  | 0.0000000  | -0.0000159 |
| H | 4.7587928  | 0.0000000  | -0.0000093 |
| C | 3.0437239  | 0.0000000  | 1.2301223  |
| H | 3.6900469  | 0.0000000  | 2.1055032  |
| C | -3.0437239 | 0.0000000  | 1.2301223  |
| H | -3.6900469 | -0.0000000 | 2.1055032  |
| C | -3.6742493 | 0.0000000  | -0.0000159 |
| H | -4.7587928 | -0.0000000 | -0.0000093 |
| C | -3.0436892 | 0.0000000  | -1.2301293 |
| H | -3.6899236 | 0.0000000  | -2.1055644 |
| S | 1.4330678  | 0.0000000  | 1.6407852  |



|    |            |           |            |
|----|------------|-----------|------------|
| S  | 1.4330067  | 0.0000000 | -1.6407189 |
| S  | -1.4330678 | 0.0000000 | 1.6407852  |
| S  | -1.4330067 | 0.0000000 | -1.6407189 |
| Ni | 0.0000000  | 0.0000000 | 0.0000541  |

## 2A

|    |            |            |            |
|----|------------|------------|------------|
| C  | 2.5022981  | -1.2163789 | -0.0000000 |
| H  | 3.1118618  | -2.1262549 | -0.0000000 |
| C  | 3.1640484  | 0.0000000  | 0.0000000  |
| C  | 2.5022981  | 1.2163789  | 0.0000000  |
| H  | 3.1118618  | 2.1262549  | 0.0000000  |
| O  | 1.2512385  | -1.3683709 | -0.0000000 |
| O  | 1.2512385  | 1.3683709  | 0.0000000  |
| C  | -2.5022981 | 1.2163789  | 0.0000000  |
| H  | -3.1118618 | 2.1262549  | 0.0000000  |
| C  | -3.1640484 | 0.0000000  | -0.0000000 |
| C  | -2.5022981 | -1.2163789 | 0.0000000  |
| H  | -3.1118618 | -2.1262549 | 0.0000000  |
| O  | -1.2512385 | 1.3683709  | -0.0000000 |
| O  | -1.2512385 | -1.3683709 | -0.0000000 |
| Ni | 0.0000000  | 0.0000000  | 0.0000000  |
| F  | 4.5130482  | 0.0000000  | 0.0000000  |
| F  | -4.5130482 | 0.0000000  | 0.0000000  |

## 2B

|   |            |            |            |
|---|------------|------------|------------|
| C | 3.0379070  | -1.2365004 | -0.0000005 |
| H | 3.7152969  | -2.0874923 | -0.0000196 |
| C | 3.6414828  | 0.0000000  | -0.0000209 |
| C | 3.0379070  | 1.2365004  | -0.0000005 |
| H | 3.7152969  | 2.0874923  | -0.0000196 |
| C | -3.0379070 | 1.2365004  | -0.0000005 |
| H | -3.7152969 | 2.0874923  | -0.0000196 |
| C | -3.6414828 | 0.0000000  | -0.0000209 |
| C | -3.0379070 | -1.2365004 | -0.0000005 |
| H | -3.7152969 | -2.0874923 | -0.0000196 |

|    |            |            |            |
|----|------------|------------|------------|
| F  | 4.9926236  | 0.0000000  | -0.0000636 |
| F  | -4.9926236 | 0.0000000  | -0.0000636 |
| S  | 1.4278055  | 1.6452604  | 0.0000473  |
| S  | 1.4278055  | -1.6452604 | 0.0000473  |
| S  | -1.4278055 | 1.6452604  | 0.0000473  |
| S  | -1.4278055 | -1.6452604 | 0.0000473  |
| Ni | 0.0000000  | 0.0000000  | 0.0000600  |

### 3A

|    |            |            |            |
|----|------------|------------|------------|
| C  | 2.5002775  | -1.2187976 | -0.0000004 |
| H  | 3.0872458  | -2.1430568 | -0.0000235 |
| C  | 3.1952160  | -0.0000000 | -0.0000083 |
| C  | 2.5002775  | 1.2187976  | -0.0000004 |
| H  | 3.0872458  | 2.1430568  | -0.0000235 |
| O  | 1.2570244  | -1.3595715 | 0.0000306  |
| O  | 1.2570244  | 1.3595715  | 0.0000306  |
| C  | -2.5002775 | 1.2187976  | -0.0000004 |
| H  | -3.0872458 | 2.1430568  | -0.0000235 |
| C  | -3.1952160 | 0.0000000  | -0.0000083 |
| C  | -2.5002775 | -1.2187976 | -0.0000004 |
| H  | -3.0872458 | -2.1430568 | -0.0000235 |
| O  | -1.2570244 | 1.3595715  | 0.0000306  |
| O  | -1.2570244 | -1.3595715 | 0.0000306  |
| Ni | 0.0000000  | 0.0000000  | 0.0000424  |
| C  | -4.6147186 | 0.0000000  | -0.0000161 |
| C  | 4.6147186  | 0.0000000  | -0.0000161 |
| N  | 5.7673013  | 0.0000000  | -0.0000101 |
| N  | -5.7673013 | 0.0000000  | -0.0000101 |

### 3B

|   |            |            |           |
|---|------------|------------|-----------|
| C | -1.2385552 | 0.0000000  | 3.0357390 |
| H | -2.1101686 | -0.0000000 | 3.6866244 |
| C | 0.0000000  | 0.0000000  | 3.6746700 |
| C | 1.2385552  | 0.0000000  | 3.0357390 |
| H | 2.1101686  | -0.0000000 | 3.6866244 |

|    |            |            |            |
|----|------------|------------|------------|
| C  | 1.2385552  | -0.0000000 | -3.0357390 |
| H  | 2.1101686  | 0.0000000  | -3.6866244 |
| C  | 0.0000000  | 0.0000000  | -3.6746700 |
| C  | -1.2385552 | 0.0000000  | -3.0357390 |
| H  | -2.1101686 | 0.0000000  | -3.6866244 |
| Ni | 0.0000000  | 0.0000000  | 0.0000000  |
| C  | 0.0000000  | 0.0000000  | -5.1032532 |
| C  | 0.0000000  | 0.0000000  | 5.1032532  |
| N  | 0.0000000  | 0.0000000  | 6.2553717  |
| N  | 0.0000000  | -0.0000000 | -6.2553717 |
| S  | 1.6381804  | -0.0000000 | -1.4316940 |
| S  | -1.6381804 | 0.0000000  | -1.4316940 |
| S  | -1.6381804 | 0.0000000  | 1.4316940  |
| S  | 1.6381804  | -0.0000000 | 1.4316940  |

#### 4A

|    |            |            |            |
|----|------------|------------|------------|
| C  | 2.4998186  | -1.2246449 | 0.0000112  |
| H  | 3.0998787  | -2.1373093 | 0.0000013  |
| C  | 3.1736503  | 0.0000000  | -0.0000167 |
| C  | 2.4998186  | 1.2246449  | 0.0000112  |
| H  | 3.0998787  | 2.1373093  | 0.0000013  |
| O  | 1.2558258  | -1.3611271 | 0.0000700  |
| O  | 1.2558258  | 1.3611271  | 0.0000700  |
| C  | -2.4998186 | 1.2246449  | 0.0000112  |
| H  | -3.0998787 | 2.1373093  | 0.0000013  |
| C  | -3.1736503 | 0.0000000  | -0.0000167 |
| C  | -2.4998186 | -1.2246449 | 0.0000112  |
| H  | -3.0998787 | -2.1373093 | 0.0000013  |
| O  | -1.2558258 | 1.3611271  | 0.0000700  |
| O  | -1.2558258 | -1.3611271 | 0.0000700  |
| Ni | 0.0000000  | 0.0000000  | 0.0000743  |
| N  | -4.6161385 | 0.0000000  | -0.0000537 |
| N  | 4.6161385  | 0.0000000  | -0.0000537 |
| O  | -5.1801110 | -1.0760111 | -0.0000659 |
| O  | -5.1801110 | 1.0760111  | -0.0000659 |

|   |           |            |            |
|---|-----------|------------|------------|
| O | 5.1801110 | -1.0760111 | -0.0000659 |
| O | 5.1801110 | 1.0760111  | -0.0000659 |

#### 4B

|    |            |            |            |
|----|------------|------------|------------|
| C  | 3.0493339  | -1.2422851 | 0.0000184  |
| H  | 3.7258729  | -2.1055124 | -0.0000862 |
| C  | 3.6986224  | 0.0000000  | -0.0000320 |
| C  | 3.0493339  | 1.2422851  | 0.0000184  |
| H  | 3.7258729  | 2.1055124  | -0.0000862 |
| C  | -3.0493339 | 1.2422851  | 0.0000184  |
| H  | -3.7258729 | 2.1055124  | -0.0000862 |
| C  | -3.6986224 | 0.0000000  | -0.0000320 |
| C  | -3.0493339 | -1.2422851 | 0.0000184  |
| H  | -3.7258729 | -2.1055124 | -0.0000862 |
| N  | -5.0451802 | 0.0000000  | -0.0001025 |
| N  | 5.0451802  | 0.0000000  | -0.0001025 |
| O  | -5.7574457 | -1.0644388 | -0.0001302 |
| O  | -5.7574457 | 1.0644388  | -0.0001302 |
| O  | 5.7574457  | -1.0644388 | -0.0001302 |
| O  | 5.7574457  | 1.0644388  | -0.0001302 |
| S  | 1.4538784  | 1.5956497  | 0.0002210  |
| S  | 1.4538784  | -1.5956497 | 0.0002210  |
| S  | -1.4538784 | -1.5956497 | 0.0002210  |
| S  | -1.4538784 | 1.5956497  | 0.0002210  |
| Ni | 0.0000000  | 0.0000000  | 0.0001769  |

#### 5A

|   |            |            |            |
|---|------------|------------|------------|
| C | 2.5142901  | -1.1977013 | 0.0000148  |
| H | 3.0929940  | -2.1310481 | -0.0000537 |
| C | 3.2240793  | 0.0000000  | 0.0000157  |
| C | 2.5142901  | 1.1977013  | 0.0000148  |
| H | 3.0929940  | 2.1310481  | -0.0000537 |
| O | 1.2587719  | -1.3508047 | 0.0000765  |
| O | 1.2587719  | 1.3508047  | 0.0000765  |
| C | -2.5142901 | 1.1977013  | 0.0000148  |

|    |            |            |            |
|----|------------|------------|------------|
| H  | -3.0929940 | 2.1310481  | -0.0000537 |
| C  | -3.2240793 | 0.0000000  | 0.0000157  |
| C  | -2.5142901 | -1.1977013 | 0.0000148  |
| H  | -3.0929940 | -2.1310481 | -0.0000537 |
| O  | -1.2587719 | 1.3508047  | 0.0000765  |
| O  | -1.2587719 | -1.3508047 | 0.0000765  |
| Ni | 0.0000000  | 0.0000000  | 0.0001156  |
| N  | -4.6211147 | 0.0000000  | 0.0002221  |
| N  | 4.6211147  | 0.0000000  | 0.0002221  |
| H  | -5.1343131 | 0.8567530  | -0.0001854 |
| H  | -5.1343131 | -0.8567530 | -0.0001854 |
| H  | 5.1343131  | 0.8567530  | -0.0001854 |
| H  | 5.1343131  | -0.8567530 | -0.0001854 |

# 5B

|   |            |            |            |
|---|------------|------------|------------|
| C | 2.9539406  | -1.2670364 | -0.0000006 |
| H | 3.6155834  | -2.1284391 | -0.0001534 |
| C | 3.5709853  | 0.0000000  | -0.0000605 |
| C | 2.9539406  | 1.2670364  | -0.0000006 |
| H | 3.6155834  | 2.1284391  | -0.0001534 |
| C | -2.9539406 | 1.2670364  | -0.0000006 |
| H | -3.6155834 | 2.1284391  | -0.0001534 |
| C | -3.5709853 | 0.0000000  | -0.0000605 |
| C | -2.9539406 | -1.2670364 | -0.0000006 |
| H | -3.6155834 | -2.1284391 | -0.0001534 |
| N | -4.9254654 | -0.0000000 | -0.0001855 |
| N | 4.9254654  | 0.0000000  | -0.0001855 |
| H | -5.4392392 | 0.8614810  | -0.0001261 |
| H | -5.4392392 | -0.8614810 | -0.0001261 |
| H | 5.4392392  | 0.8614810  | -0.0001261 |
| H | 5.4392392  | -0.8614810 | -0.0001261 |
| S | 1.3257495  | 1.6688031  | 0.0003020  |
| S | 1.3257495  | -1.6688031 | 0.0003020  |
| S | -1.3257495 | 1.6688031  | 0.0003020  |
| S | -1.3257495 | -1.6688031 | 0.0003020  |

|    |           |           |           |
|----|-----------|-----------|-----------|
| Ni | 0.0000000 | 0.0000000 | 0.0004042 |
|----|-----------|-----------|-----------|

**6A**

|    |            |            |            |
|----|------------|------------|------------|
| C  | 2.5654841  | -1.0691808 | -0.0000142 |
| H  | 3.1995152  | -1.9648619 | 0.0015116  |
| C  | 3.2020361  | 0.1703254  | -0.0005036 |
| C  | 2.4372592  | 1.3368686  | -0.0025506 |
| H  | 2.9908527  | 2.2833681  | -0.0034916 |
| O  | 1.3260101  | -1.2951506 | -0.0007608 |
| O  | 1.1817960  | 1.4273288  | -0.0033762 |
| C  | -2.5654841 | 1.0691808  | -0.0000142 |
| H  | -3.1995152 | 1.9648619  | 0.0015116  |
| C  | -3.2020361 | -0.1703254 | -0.0005036 |
| C  | -2.4372592 | -1.3368686 | -0.0025506 |
| H  | -2.9908527 | -2.2833681 | -0.0034916 |
| O  | -1.3260101 | 1.2951506  | -0.0007608 |
| O  | -1.1817960 | -1.4273288 | -0.0033762 |
| Ni | 0.0000000  | 0.0000000  | -0.0021218 |
| N  | -4.6199539 | -0.2914530 | 0.0014645  |
| N  | 4.6199539  | 0.2914530  | 0.0014645  |
| C  | -5.2637913 | 0.1860319  | 1.2064988  |
| H  | -5.2436916 | 1.2847348  | 1.3115446  |
| H  | -6.3115112 | -0.1264869 | 1.2115834  |
| H  | -4.7745842 | -0.2468170 | 2.0802537  |
| C  | -5.2658476 | 0.1811300  | -1.2043080 |
| H  | -4.7876694 | -0.2660485 | -2.0770171 |
| H  | -6.3171357 | -0.1189908 | -1.1991608 |
| H  | -5.2333188 | 1.2784233  | -1.3206127 |
| C  | 5.2637913  | -0.1860319 | 1.2064988  |
| H  | 5.2436916  | -1.2847348 | 1.3115446  |
| H  | 6.3115112  | 0.1264869  | 1.2115834  |
| H  | 4.7745842  | 0.2468170  | 2.0802537  |
| C  | 5.2658476  | -0.1811300 | -1.2043080 |
| H  | 4.7876694  | 0.2660485  | -2.0770171 |
| H  | 6.3171357  | 0.1189908  | -1.1991608 |



|           |            |            |            |
|-----------|------------|------------|------------|
| H         | 5.2333188  | -1.2784233 | -1.3206127 |
| <b>6B</b> |            |            |            |
| C         | 3.1043671  | -1.0569851 | 0.0023579  |
| H         | 3.7938023  | -1.9004886 | 0.0051684  |
| C         | 3.6901014  | 0.1998437  | -0.0002922 |
| C         | 2.9763159  | 1.3878728  | -0.0044868 |
| H         | 3.5926426  | 2.2846903  | -0.0068049 |
| C         | -3.1043671 | 1.0569851  | 0.0023579  |
| H         | -3.7938023 | 1.9004886  | 0.0051684  |
| C         | -3.6901014 | -0.1998437 | -0.0002922 |
| C         | -2.9763159 | -1.3878728 | -0.0044868 |
| H         | -3.5926426 | -2.2846903 | -0.0068049 |
| N         | -5.1178469 | -0.3155783 | 0.0016973  |
| N         | 5.1178469  | 0.3155783  | 0.0016973  |
| C         | -5.7429524 | 0.1896524  | 1.2059034  |
| H         | -5.6873528 | 1.2877508  | 1.3052356  |
| H         | -6.7992104 | -0.0903693 | 1.2092922  |
| H         | -5.2679237 | -0.2541495 | 2.0820461  |
| C         | -5.7452488 | 0.1829103  | -1.2040691 |
| H         | -5.2795165 | -0.2739024 | -2.0785884 |
| H         | -6.8040159 | -0.0873293 | -1.1984783 |
| H         | -5.6799426 | 1.2794231  | -1.3146316 |
| C         | 5.7429524  | -0.1896524 | 1.2059034  |
| H         | 5.6873528  | -1.2877508 | 1.3052356  |
| H         | 6.7992104  | 0.0903693  | 1.2092922  |
| H         | 5.2679237  | 0.2541495  | 2.0820461  |
| C         | 5.7452488  | -0.1829103 | -1.2040691 |
| H         | 5.2795165  | 0.2739024  | -2.0785884 |
| H         | 6.8040159  | 0.0873293  | -1.1984783 |
| H         | 5.6799426  | -1.2794231 | -1.3146316 |
| S         | -1.3457981 | -1.7099740 | -0.0061401 |
| S         | -1.5192800 | 1.5558389  | 0.0026079  |
| S         | 1.5192800  | -1.5558389 | 0.0026079  |
| S         | 1.3457981  | 1.7099740  | -0.0061401 |

|           |            |            |            |
|-----------|------------|------------|------------|
| Ni        | 0.0000000  | 0.0000000  | -0.0016345 |
| <b>7A</b> |            |            |            |
| C         | 2.5141772  | -1.1927472 | -0.0248462 |
| H         | 3.0709599  | -2.1345054 | -0.0252861 |
| C         | 3.2368928  | -0.0000000 | 0.0157893  |
| C         | 2.5141772  | 1.1927472  | -0.0248462 |
| H         | 3.0709599  | 2.1345054  | -0.0252861 |
| O         | 1.2626979  | -1.3454106 | -0.0646298 |
| O         | 1.2626979  | 1.3454106  | -0.0646298 |
| C         | -2.5141772 | 1.1927472  | -0.0248462 |
| H         | -3.0709599 | 2.1345054  | -0.0252861 |
| C         | -3.2368928 | 0.0000000  | 0.0157893  |
| C         | -2.5141772 | -1.1927472 | -0.0248462 |
| H         | -3.0709599 | -2.1345054 | -0.0252861 |
| O         | -1.2626979 | 1.3454106  | -0.0646298 |
| O         | -1.2626979 | -1.3454106 | -0.0646298 |
| Ni        | 0.0000000  | 0.0000000  | -0.0642318 |
| C         | -4.7664383 | 0.0000000  | 0.0187309  |
| C         | 4.7664383  | -0.0000000 | 0.0187309  |
| C         | -5.3195270 | 1.2330603  | 0.7399453  |
| H         | -5.1014105 | 2.1613856  | 0.2081917  |
| H         | -6.4071852 | 1.1581988  | 0.8122081  |
| H         | -4.9165233 | 1.3154813  | 1.7524715  |
| C         | -5.3195270 | -1.2330603 | 0.7399453  |
| H         | -6.4071852 | -1.1581988 | 0.8122081  |
| H         | -5.1014105 | -2.1613856 | 0.2081917  |
| H         | -4.9165233 | -1.3154813 | 1.7524715  |
| C         | -5.2842029 | 0.0000000  | -1.4239503 |
| H         | -6.3783035 | 0.0000000  | -1.4459609 |
| H         | -4.9327621 | 0.8826841  | -1.9643009 |
| H         | -4.9327621 | -0.8826841 | -1.9643009 |
| C         | 5.2842029  | 0.0000000  | -1.4239503 |
| H         | 4.9327621  | 0.8826841  | -1.9643009 |
| H         | 6.3783035  | 0.0000000  | -1.4459609 |

|   |           |            |            |
|---|-----------|------------|------------|
| H | 4.9327621 | -0.8826841 | -1.9643009 |
| C | 5.3195270 | 1.2330603  | 0.7399453  |
| H | 6.4071852 | 1.1581988  | 0.8122081  |
| H | 5.1014105 | 2.1613856  | 0.2081917  |
| H | 4.9165233 | 1.3154813  | 1.7524715  |
| C | 5.3195270 | -1.2330603 | 0.7399453  |
| H | 4.9165233 | -1.3154813 | 1.7524715  |
| H | 5.1014105 | -2.1613856 | 0.2081917  |
| H | 6.4071852 | -1.1581988 | 0.8122081  |

# 7B

|   |            |            |            |
|---|------------|------------|------------|
| C | 3.0557235  | -1.2102211 | -0.0323160 |
| H | 3.6652285  | -2.1088473 | -0.0330221 |
| C | 3.7331850  | -0.0000000 | 0.0148456  |
| C | 3.0557235  | 1.2102211  | -0.0323160 |
| H | 3.6652285  | 2.1088473  | -0.0330221 |
| C | -3.0557235 | 1.2102211  | -0.0323160 |
| H | -3.6652285 | 2.1088473  | -0.0330221 |
| C | -3.7331850 | 0.0000000  | 0.0148456  |
| C | -3.0557235 | -1.2102211 | -0.0323160 |
| H | -3.6652285 | -2.1088473 | -0.0330221 |
| C | -5.2719009 | 0.0000000  | 0.0283027  |
| C | 5.2719009  | 0.0000000  | 0.0283027  |
| C | -5.8265070 | 1.2320386  | 0.7490871  |
| H | -5.6299685 | 2.1601625  | 0.2087514  |
| H | -6.9117229 | 1.1448490  | 0.8367667  |
| H | -5.4109768 | 1.3253122  | 1.7554765  |
| C | -5.8265070 | -1.2320386 | 0.7490871  |
| H | -6.9117229 | -1.1448490 | 0.8367667  |
| H | -5.6299685 | -2.1601625 | 0.2087514  |
| H | -5.4109768 | -1.3253122 | 1.7554765  |
| C | -5.7747810 | 0.0000000  | -1.4190448 |
| H | -6.8683834 | 0.0000000  | -1.4481501 |
| H | -5.4195052 | 0.8830558  | -1.9558946 |
| H | -5.4195052 | -0.8830558 | -1.9558946 |

|    |            |            |            |
|----|------------|------------|------------|
| C  | 5.7747810  | 0.0000000  | -1.4190448 |
| H  | 5.4195052  | 0.8830558  | -1.9558946 |
| H  | 6.8683834  | 0.0000000  | -1.4481501 |
| H  | 5.4195052  | -0.8830558 | -1.9558946 |
| C  | 5.8265070  | 1.2320386  | 0.7490871  |
| H  | 6.9117229  | 1.1448490  | 0.8367667  |
| H  | 5.6299685  | 2.1601625  | 0.2087514  |
| H  | 5.4109768  | 1.3253122  | 1.7554765  |
| C  | 5.8265070  | -1.2320386 | 0.7490871  |
| H  | 5.4109768  | -1.3253122 | 1.7554765  |
| H  | 5.6299685  | -2.1601625 | 0.2087514  |
| H  | 6.9117229  | -1.1448490 | 0.8367667  |
| S  | -1.4427635 | 1.6150529  | -0.0953233 |
| S  | -1.4427635 | -1.6150529 | -0.0953233 |
| S  | 1.4427635  | -1.6150529 | -0.0953233 |
| S  | 1.4427635  | 1.6150529  | -0.0953233 |
| Ni | 0.0000000  | 0.0000000  | -0.0860095 |

# 8A

|   |            |            |            |
|---|------------|------------|------------|
| C | 2.5849538  | -1.2292134 | 0.0000000  |
| H | 3.2120453  | -2.1285012 | 0.0000000  |
| C | 3.2373874  | 0.0000000  | 0.0000000  |
| H | 4.3187910  | 0.0000000  | 0.0000000  |
| C | 2.5849538  | 1.2292134  | -0.0000000 |
| H | 3.2120453  | 2.1285012  | -0.0000000 |
| O | 1.3477604  | -1.4591216 | 0.0000000  |
| O | 1.3477604  | 1.4591216  | 0.0000000  |
| C | -2.5849538 | 1.2292134  | 0.0000000  |
| H | -3.2120453 | 2.1285012  | -0.0000000 |
| C | -3.2373874 | -0.0000000 | 0.0000000  |
| H | -4.3187910 | -0.0000000 | 0.0000000  |
| C | -2.5849538 | -1.2292134 | -0.0000000 |
| H | -3.2120453 | -2.1285012 | 0.0000000  |
| O | -1.3477604 | 1.4591216  | -0.0000000 |
| O | -1.3477604 | -1.4591216 | 0.0000000  |

|    |           |           |           |
|----|-----------|-----------|-----------|
| Pd | 0.0000000 | 0.0000000 | 0.0000000 |
|----|-----------|-----------|-----------|

**8B**

|    |            |            |            |
|----|------------|------------|------------|
| C  | -3.1106263 | 0.0000000  | -1.2433562 |
| H  | -3.7872135 | 0.0000000  | -2.0963160 |
| C  | -3.7197453 | 0.0000000  | 0.0001513  |
| H  | -4.8046387 | 0.0000000  | 0.0001211  |
| C  | -3.1102845 | 0.0000000  | 1.2434892  |
| H  | -3.7862980 | 0.0000000  | 2.0969129  |
| C  | 3.1102845  | 0.0000000  | 1.2434892  |
| H  | 3.7862980  | 0.0000000  | 2.0969129  |
| C  | 3.7197453  | 0.0000000  | 0.0001513  |
| H  | 4.8046387  | 0.0000000  | 0.0001211  |
| C  | 3.1106263  | 0.0000000  | -1.2433562 |
| H  | 3.7872135  | -0.0000000 | -2.0963160 |
| S  | -1.5200471 | 0.0000000  | 1.7207674  |
| S  | -1.5206117 | 0.0000000  | -1.7214928 |
| S  | 1.5200471  | 0.0000000  | 1.7207674  |
| S  | 1.5206117  | 0.0000000  | -1.7214928 |
| Pd | 0.0000000  | 0.0000000  | -0.0005537 |

**9A**

|   |            |            |            |
|---|------------|------------|------------|
| C | 2.5840070  | -1.2371457 | 0.0000000  |
| H | 3.2377972  | -2.1159870 | 0.0000000  |
| C | 3.2123443  | 0.0000000  | 0.0000000  |
| C | 2.5840070  | 1.2371457  | 0.0000000  |
| H | 3.2377972  | 2.1159870  | -0.0000000 |
| O | 1.3446656  | -1.4612241 | -0.0000000 |
| O | 1.3446656  | 1.4612241  | 0.0000000  |
| C | -2.5840070 | 1.2371457  | 0.0000000  |
| H | -3.2377972 | 2.1159870  | 0.0000000  |
| C | -3.2123443 | 0.0000000  | 0.0000000  |
| C | -2.5840070 | -1.2371457 | 0.0000000  |
| H | -3.2377972 | -2.1159870 | -0.0000000 |
| O | -1.3446656 | 1.4612241  | 0.0000000  |

|    |            |            |            |
|----|------------|------------|------------|
| O  | -1.3446656 | -1.4612241 | 0.0000000  |
| F  | 4.5647432  | -0.0000000 | 0.0000000  |
| F  | -4.5647432 | 0.0000000  | -0.0000000 |
| Pd | 0.0000000  | 0.0000000  | 0.0000000  |

# **9B**

|    |            |            |            |
|----|------------|------------|------------|
| C  | 3.1038595  | -0.0000000 | -1.2485412 |
| H  | 3.8110962  | 0.0000000  | -2.0756528 |
| C  | 3.6874464  | 0.0000000  | 0.0000241  |
| C  | 3.1036615  | -0.0000000 | 1.2485906  |
| H  | 3.8100209  | 0.0000000  | 2.0765412  |
| C  | -3.1036615 | -0.0000000 | 1.2485906  |
| H  | -3.8100209 | 0.0000000  | 2.0765412  |
| C  | -3.6874464 | 0.0000000  | 0.0000241  |
| C  | -3.1038595 | 0.0000000  | -1.2485412 |
| H  | -3.8110962 | 0.0000000  | -2.0756528 |
| F  | 5.0414153  | -0.0000000 | 0.0001698  |
| F  | -5.0414153 | 0.0000000  | 0.0001698  |
| S  | 1.5139993  | 0.0000000  | 1.7249258  |
| S  | 1.5144109  | -0.0000000 | -1.7257887 |
| S  | -1.5139993 | 0.0000000  | 1.7249258  |
| S  | -1.5144109 | 0.0000000  | -1.7257887 |
| Pd | 0.0000000  | 0.0000000  | -0.0005377 |

# **10A**

|   |             |             |            |
|---|-------------|-------------|------------|
| C | -0.49079752 | -1.19631900 | 0.00000000 |
| H | 0.13787775  | -2.09305747 | 0.00000000 |
| C | 0.17156623  | 0.04402273  | 0.00000000 |
| C | -0.49079752 | 1.28436446  | 0.00000000 |
| H | 0.13787775  | 2.18110293  | 0.00000000 |
| O | -1.72362864 | -1.40543503 | 0.00000000 |
| O | -1.72362864 | 1.49348049  | 0.00000000 |
| C | -5.66413380 | 1.28436446  | 0.00000000 |
| H | -6.29280907 | 2.18110293  | 0.00000000 |
| C | -6.32649755 | 0.04402273  | 0.00000000 |



|    |             |             |            |
|----|-------------|-------------|------------|
| C  | -5.66413380 | -1.19631900 | 0.00000000 |
| H  | -6.29280907 | -2.09305747 | 0.00000000 |
| O  | -4.43130268 | 1.49348049  | 0.00000000 |
| O  | -4.43130268 | -1.40543503 | 0.00000000 |
| Pd | -3.07746566 | 0.04402273  | 0.00000000 |
| C  | -7.74846349 | 0.04402273  | 0.00000000 |
| C  | 1.59353217  | 0.04402273  | 0.00000000 |
| N  | -8.90097133 | 0.04402273  | 0.00000000 |
| N  | 2.74604001  | 0.04402273  | 0.00000000 |

#### 10B

|    |              |             |             |
|----|--------------|-------------|-------------|
| C  | -0.93655596  | 0.40785498  | 0.00000000  |
| H  | -0.25723208  | -0.44258684 | -0.00002699 |
| C  | -0.31707356  | 1.65944172  | -0.00007514 |
| C  | -0.93655596  | 2.91102847  | 0.00000000  |
| H  | -0.25723208  | 3.76147029  | -0.00002699 |
| C  | -7.14738762  | 2.91102847  | 0.00000000  |
| H  | -7.82671151  | 3.76147029  | -0.00002699 |
| C  | -7.76687003  | 1.65944172  | -0.00007514 |
| C  | -7.14738762  | 0.40785498  | 0.00000000  |
| H  | -7.82671151  | -0.44258684 | -0.00002699 |
| S  | -2.52081052  | 3.37608955  | 0.00013388  |
| S  | -2.52081052  | -0.05720610 | 0.00013388  |
| S  | -5.56313307  | -0.05720610 | 0.00013388  |
| S  | -5.56313307  | 3.37608955  | 0.00013388  |
| Pd | -4.04197179  | 1.65944172  | 0.00013494  |
| C  | -9.19677257  | 1.65944172  | -0.00021432 |
| C  | 1.11282899   | 1.65944172  | -0.00021432 |
| N  | -10.34896713 | 1.65944172  | -0.00032756 |
| N  | 2.26502354   | 1.65944172  | -0.00032756 |

#### 11A

|   |           |            |            |
|---|-----------|------------|------------|
| C | 2.5886356 | -1.2443862 | 0.0000210  |
| H | 3.2288256 | -2.1294941 | -0.0000020 |
| C | 3.2323912 | 0.0000000  | -0.0000183 |

|    |            |            |            |
|----|------------|------------|------------|
| C  | 2.5886356  | 1.2443862  | 0.0000210  |
| H  | 3.2288256  | 2.1294941  | -0.0000020 |
| O  | 1.3547005  | -1.4484440 | 0.0000804  |
| O  | 1.3547005  | 1.4484440  | 0.0000804  |
| C  | -2.5886356 | 1.2443862  | 0.0000210  |
| H  | -3.2288256 | 2.1294941  | -0.0000020 |
| C  | -3.2323912 | 0.0000000  | -0.0000183 |
| C  | -2.5886356 | -1.2443862 | 0.0000210  |
| H  | -3.2288256 | -2.1294941 | -0.0000020 |
| O  | -1.3547005 | 1.4484440  | 0.0000804  |
| O  | -1.3547005 | -1.4484440 | 0.0000804  |
| N  | -4.6814706 | 0.0000000  | -0.0000660 |
| N  | 4.6814706  | 0.0000000  | -0.0000660 |
| O  | -5.2473239 | -1.0746222 | -0.0000806 |
| O  | -5.2473239 | 1.0746222  | -0.0000806 |
| O  | 5.2473239  | -1.0746222 | -0.0000806 |
| O  | 5.2473239  | 1.0746222  | -0.0000806 |
| Pd | 0.0000000  | 0.0000000  | 0.0000933  |

# 11B

|   |            |            |            |
|---|------------|------------|------------|
| C | 3.1214047  | -1.2536875 | 0.0000233  |
| H | 3.8364951  | -2.0895422 | -0.0000749 |
| C | 3.7492493  | 0.0000000  | -0.0000302 |
| C | 3.1214047  | 1.2536875  | 0.0000233  |
| H | 3.8364951  | 2.0895422  | -0.0000749 |
| C | -3.1214047 | 1.2536875  | 0.0000233  |
| H | -3.8364951 | 2.0895422  | -0.0000749 |
| C | -3.7492493 | 0.0000000  | -0.0000302 |
| C | -3.1214047 | -1.2536875 | 0.0000233  |
| H | -3.8364951 | -2.0895422 | -0.0000749 |
| N | -5.0995222 | 0.0000000  | -0.0001151 |
| N | 5.0995222  | 0.0000000  | -0.0001151 |
| O | -5.8060740 | -1.0675620 | -0.0001483 |
| O | -5.8060740 | 1.0675620  | -0.0001483 |
| O | 5.8060740  | -1.0675620 | -0.0001483 |

|    |            |            |            |
|----|------------|------------|------------|
| O  | 5.8060740  | 1.0675620  | -0.0001483 |
| S  | 1.5463774  | 1.6810557  | 0.0002145  |
| S  | 1.5463774  | -1.6810557 | 0.0002145  |
| S  | -1.5463774 | -1.6810557 | 0.0002145  |
| S  | -1.5463774 | 1.6810557  | 0.0002145  |
| Pd | 0.0000000  | 0.0000000  | 0.0002322  |

# 12A

|    |            |            |            |
|----|------------|------------|------------|
| C  | 2.5997393  | -1.2179382 | -0.0000061 |
| H  | 3.2184018  | -2.1252015 | 0.0000210  |
| C  | 3.2794034  | 0.0000000  | 0.0000916  |
| C  | 2.5997393  | 1.2179382  | -0.0000061 |
| H  | 3.2184018  | 2.1252015  | 0.0000210  |
| O  | 1.3551492  | -1.4406886 | -0.0000515 |
| O  | 1.3551492  | 1.4406886  | -0.0000515 |
| C  | -2.5997393 | 1.2179382  | -0.0000061 |
| H  | -3.2184018 | 2.1252015  | 0.0000210  |
| C  | -3.2794034 | -0.0000000 | 0.0000916  |
| C  | -2.5997393 | -1.2179382 | -0.0000061 |
| H  | -3.2184018 | -2.1252015 | 0.0000210  |
| O  | -1.3551492 | 1.4406886  | -0.0000515 |
| O  | -1.3551492 | -1.4406886 | -0.0000515 |
| N  | -4.6799062 | 0.0000000  | 0.0020193  |
| N  | 4.6799062  | 0.0000000  | 0.0020193  |
| H  | -5.1928616 | 0.8568038  | -0.0010215 |
| H  | -5.1928616 | -0.8568038 | -0.0010215 |
| H  | 5.1928616  | 0.8568038  | -0.0010215 |
| H  | 5.1928616  | -0.8568038 | -0.0010215 |
| Pd | 0.0000000  | 0.0000000  | 0.0000103  |

# 12B

|   |           |            |            |
|---|-----------|------------|------------|
| C | 3.0314564 | -1.2797943 | 0.0000007  |
| H | 3.7215163 | -2.1191905 | -0.0001902 |
| C | 3.6291939 | -0.0000000 | -0.0000616 |
| C | 3.0314564 | 1.2797943  | 0.0000007  |

|    |            |            |            |
|----|------------|------------|------------|
| H  | 3.7215163  | 2.1191905  | -0.0001902 |
| C  | -3.0314564 | 1.2797943  | 0.0000007  |
| H  | -3.7215163 | 2.1191905  | -0.0001902 |
| C  | -3.6291939 | 0.0000000  | -0.0000616 |
| C  | -3.0314564 | -1.2797943 | 0.0000007  |
| H  | -3.7215163 | -2.1191905 | -0.0001902 |
| N  | -4.9853786 | 0.0000000  | -0.0002140 |
| N  | 4.9853786  | 0.0000000  | -0.0002140 |
| H  | -5.4992454 | 0.8614658  | -0.0001337 |
| H  | -5.4992454 | -0.8614658 | -0.0001337 |
| H  | 5.4992454  | 0.8614658  | -0.0001337 |
| H  | 5.4992454  | -0.8614658 | -0.0001337 |
| S  | 1.4211666  | 1.7545699  | 0.0003422  |
| S  | 1.4211666  | -1.7545699 | 0.0003422  |
| S  | -1.4211666 | 1.7545699  | 0.0003422  |
| S  | -1.4211666 | -1.7545699 | 0.0003422  |
| Pd | 0.0000000  | 0.0000000  | 0.0004753  |

### 13A

|   |            |            |            |
|---|------------|------------|------------|
| C | 2.6488937  | -1.0868676 | -0.0004211 |
| H | 3.3237877  | -1.9523622 | 0.0008909  |
| C | 3.2540537  | 0.1707814  | -0.0003687 |
| C | 2.5201653  | 1.3609201  | -0.0021229 |
| H | 3.1175527  | 2.2800854  | -0.0026339 |
| O | 1.4246613  | -1.3817166 | -0.0014549 |
| O | 1.2727205  | 1.5222121  | -0.0031582 |
| C | -2.6488937 | 1.0868676  | -0.0004211 |
| H | -3.3237877 | 1.9523622  | 0.0008909  |
| C | -3.2540537 | -0.1707814 | -0.0003687 |
| C | -2.5201653 | -1.3609201 | -0.0021229 |
| H | -3.1175527 | -2.2800854 | -0.0026339 |
| O | -1.4246613 | 1.3817166  | -0.0014549 |
| O | -1.2727205 | -1.5222121 | -0.0031582 |
| N | -4.6747766 | -0.2888907 | 0.0016583  |
| N | 4.6747766  | 0.2888907  | 0.0016583  |

|    |            |            |            |
|----|------------|------------|------------|
| C  | -5.3202521 | 0.1851431  | 1.2066005  |
| H  | -5.3001822 | 1.2836477  | 1.3154010  |
| H  | -6.3681429 | -0.1269120 | 1.2075513  |
| H  | -4.8330445 | -0.2498570 | 2.0805857  |
| C  | -5.3223846 | 0.1794449  | -1.2043525 |
| H  | -4.8448790 | -0.2687355 | -2.0770240 |
| H  | -6.3732513 | -0.1221526 | -1.1959849 |
| H  | -5.2921583 | 1.2765713  | -1.3239305 |
| C  | 5.3202521  | -0.1851431 | 1.2066005  |
| H  | 5.3001822  | -1.2836477 | 1.3154010  |
| H  | 6.3681429  | 0.1269120  | 1.2075513  |
| H  | 4.8330445  | 0.2498570  | 2.0805857  |
| C  | 5.3223846  | -0.1794449 | -1.2043525 |
| H  | 4.8448790  | 0.2687355  | -2.0770240 |
| H  | 6.3732513  | 0.1221526  | -1.1959849 |
| H  | 5.2921583  | -1.2765713 | -1.3239305 |
| Pd | 0.0000000  | -0.0000000 | -0.0024724 |

### 13B

|   |            |            |            |
|---|------------|------------|------------|
| C | 3.1731661  | -1.0680669 | 0.0015412  |
| H | 3.8892083  | -1.8899316 | 0.0042107  |
| C | 3.7408775  | 0.1992719  | -0.0002315 |
| C | 3.0457685  | 1.4016012  | -0.0037678 |
| H | 3.6921347  | 2.2777108  | -0.0054463 |
| C | -3.1731661 | 1.0680669  | 0.0015412  |
| H | -3.8892083 | 1.8899316  | 0.0042107  |
| C | -3.7408775 | -0.1992719 | -0.0002315 |
| C | -3.0457685 | -1.4016012 | -0.0037678 |
| H | -3.6921347 | -2.2777108 | -0.0054463 |
| N | -5.1705571 | -0.3130258 | 0.0018726  |
| N | 5.1705571  | 0.3130258  | 0.0018726  |
| C | -5.7971541 | 0.1889152  | 1.2062291  |
| H | -5.7451534 | 1.2871698  | 1.3071744  |
| H | -6.8526194 | -0.0938877 | 1.2088794  |
| H | -5.3210682 | -0.2544260 | 2.0820778  |

|    |            |            |            |
|----|------------|------------|------------|
| C  | -5.7994493 | 0.1817175  | -1.2041680 |
| H  | -5.3320362 | -0.2743748 | -2.0782349 |
| H  | -6.8572981 | -0.0920691 | -1.1981866 |
| H  | -5.7385087 | 1.2784037  | -1.3163679 |
| C  | 5.7971541  | -0.1889152 | 1.2062291  |
| H  | 5.7451534  | -1.2871698 | 1.3071744  |
| H  | 6.8526194  | 0.0938877  | 1.2088794  |
| H  | 5.3210682  | 0.2544260  | 2.0820778  |
| C  | 5.7994493  | -0.1817175 | -1.2041680 |
| H  | 5.3320362  | 0.2743748  | -2.0782349 |
| H  | 6.8572981  | 0.0920691  | -1.1981866 |
| H  | 5.7385087  | -1.2784037 | -1.3163679 |
| S  | -1.4319440 | -1.7920992 | -0.0053274 |
| S  | -1.6112525 | 1.6307077  | 0.0008901  |
| S  | 1.6112525  | -1.6307077 | 0.0008901  |
| S  | 1.4319440  | 1.7920992  | -0.0053274 |
| Pd | 0.0000000  | -0.0000000 | -0.0022897 |

#### 14A

|   |            |            |            |
|---|------------|------------|------------|
| C | 2.6051283  | -1.2119351 | -0.0273263 |
| H | 3.1996819  | -2.1297765 | -0.0282299 |
| C | 3.2999925  | 0.0000000  | 0.0153136  |
| C | 2.6051283  | 1.2119351  | -0.0273263 |
| H | 3.1996819  | 2.1297765  | -0.0282299 |
| O | 1.3639733  | -1.4310241 | -0.0678339 |
| O | 1.3639733  | 1.4310241  | -0.0678339 |
| C | -2.6051283 | 1.2119351  | -0.0273263 |
| H | -3.1996819 | 2.1297765  | -0.0282299 |
| C | -3.2999925 | 0.0000000  | 0.0153136  |
| C | -2.6051283 | -1.2119351 | -0.0273263 |
| H | -3.1996819 | -2.1297765 | -0.0282299 |
| O | -1.3639733 | 1.4310241  | -0.0678339 |
| O | -1.3639733 | -1.4310241 | -0.0678339 |
| C | -4.8349496 | 0.0000000  | 0.0190403  |
| C | 4.8349496  | 0.0000000  | 0.0190403  |



|    |            |            |            |
|----|------------|------------|------------|
| C  | -5.3919470 | 1.2312655  | 0.7419798  |
| H  | -5.1914900 | 2.1609748  | 0.2057375  |
| H  | -6.4779108 | 1.1460049  | 0.8266197  |
| H  | -4.9787587 | 1.3206203  | 1.7498645  |
| C  | -5.3919470 | -1.2312655 | 0.7419798  |
| H  | -6.4779108 | -1.1460049 | 0.8266197  |
| H  | -5.1914900 | -2.1609748 | 0.2057375  |
| H  | -4.9787587 | -1.3206203 | 1.7498645  |
| C  | -5.3501195 | 0.0000000  | -1.4243824 |
| H  | -6.4441660 | 0.0000000  | -1.4506817 |
| H  | -4.9970054 | 0.8827036  | -1.9636576 |
| H  | -4.9970054 | -0.8827036 | -1.9636576 |
| C  | 5.3501195  | 0.0000000  | -1.4243824 |
| H  | 4.9970054  | 0.8827036  | -1.9636576 |
| H  | 6.4441660  | 0.0000000  | -1.4506817 |
| H  | 4.9970054  | -0.8827036 | -1.9636576 |
| C  | 5.3919470  | 1.2312655  | 0.7419798  |
| H  | 6.4779108  | 1.1460049  | 0.8266197  |
| H  | 5.1914900  | 2.1609748  | 0.2057375  |
| H  | 4.9787587  | 1.3206203  | 1.7498645  |
| C  | 5.3919470  | -1.2312655 | 0.7419798  |
| H  | 4.9787587  | -1.3206203 | 1.7498645  |
| H  | 5.1914900  | -2.1609748 | 0.2057375  |
| H  | 6.4779108  | -1.1460049 | 0.8266197  |
| Pd | 0.0000000  | 0.0000000  | -0.0671951 |

#### 14B

|   |            |            |           |
|---|------------|------------|-----------|
| C | 3.0595321  | -1.2560408 | 0.0566776 |
| H | 3.7051959  | -2.1226121 | 0.0689577 |
| C | 3.6777533  | 0.0000000  | 0.0751444 |
| C | 3.0595321  | 1.2560408  | 0.0566776 |
| H | 3.7051959  | 2.1226121  | 0.0689577 |
| C | -3.0595321 | 1.2560408  | 0.0566776 |
| H | -3.7051959 | 2.1226121  | 0.0689577 |
| C | -3.6777533 | 0.0000000  | 0.0751444 |

|    |            |            |            |
|----|------------|------------|------------|
| C  | -3.0595321 | -1.2560408 | 0.0566776  |
| H  | -3.7051959 | -2.1226121 | 0.0689577  |
| C  | -5.2156073 | 0.0000000  | 0.0235140  |
| C  | 5.2156073  | -0.0000000 | 0.0235140  |
| C  | -5.8293832 | 1.2322834  | 0.6973900  |
| H  | -5.6257794 | 2.1572129  | 0.1563305  |
| H  | -6.9151817 | 1.1184702  | 0.7247761  |
| H  | -5.4738987 | 1.3465781  | 1.7238055  |
| C  | -5.8293832 | -1.2322834 | 0.6973900  |
| H  | -6.9151817 | -1.1184702 | 0.7247761  |
| H  | -5.6257794 | -2.1572129 | 0.1563305  |
| H  | -5.4738987 | -1.3465781 | 1.7238055  |
| C  | -5.6071319 | 0.0000000  | -1.4629661 |
| H  | -6.6967446 | -0.0000000 | -1.5588878 |
| H  | -5.2159523 | 0.8845688  | -1.9695970 |
| H  | -5.2159523 | -0.8845688 | -1.9695970 |
| C  | 5.6071319  | -0.0000000 | -1.4629661 |
| H  | 5.2159523  | 0.8845688  | -1.9695970 |
| H  | 6.6967446  | 0.0000000  | -1.5588878 |
| H  | 5.2159523  | -0.8845688 | -1.9695970 |
| C  | 5.8293832  | 1.2322834  | 0.6973900  |
| H  | 6.9151817  | 1.1184702  | 0.7247761  |
| H  | 5.6257794  | 2.1572129  | 0.1563305  |
| H  | 5.4738987  | 1.3465781  | 1.7238055  |
| C  | 5.8293832  | -1.2322834 | 0.6973900  |
| H  | 5.4738987  | -1.3465781 | 1.7238055  |
| H  | 5.6257794  | -2.1572129 | 0.1563305  |
| H  | 6.9151817  | -1.1184702 | 0.7247761  |
| S  | -1.4339709 | 1.7314204  | 0.0035514  |
| S  | -1.4339709 | -1.7314204 | 0.0035514  |
| S  | 1.4339709  | -1.7314204 | 0.0035514  |
| S  | 1.4339709  | 1.7314204  | 0.0035514  |
| Pd | 0.0000000  | 0.0000000  | -0.0011764 |

|    |            |            |            |
|----|------------|------------|------------|
| C  | 2.5808626  | -1.2322053 | -0.0000000 |
| H  | 3.2046708  | -2.1313671 | -0.0000000 |
| C  | 3.2257849  | 0.0000000  | 0.0000000  |
| H  | 4.3073354  | 0.0000000  | 0.0000000  |
| C  | 2.5808626  | 1.2322053  | -0.0000000 |
| H  | 3.2046708  | 2.1313671  | 0.0000000  |
| O  | 1.3401131  | -1.4667361 | 0.0000000  |
| O  | 1.3401131  | 1.4667361  | 0.0000000  |
| C  | -2.5808626 | 1.2322053  | 0.0000000  |
| H  | -3.2046708 | 2.1313671  | -0.0000000 |
| C  | -3.2257849 | 0.0000000  | 0.0000000  |
| H  | -4.3073354 | 0.0000000  | 0.0000000  |
| C  | -2.5808626 | -1.2322053 | -0.0000000 |
| H  | -3.2046708 | -2.1313671 | 0.0000000  |
| O  | -1.3401131 | 1.4667361  | 0.0000000  |
| O  | -1.3401131 | -1.4667361 | 0.0000000  |
| Pt | 0.0000000  | 0.0000000  | 0.0000000  |

# 15B

|    |            |            |            |
|----|------------|------------|------------|
| C  | 3.1730538  | -1.2349258 | 0.0000000  |
| H  | 3.7661648  | -2.1687481 | 0.0000000  |
| C  | 3.7711122  | -0.0000000 | 0.0000000  |
| H  | 4.8560049  | 0.0000000  | 0.0000000  |
| C  | 3.1730538  | 1.2349258  | -0.0000000 |
| H  | 3.7661648  | 2.1687481  | 0.0000000  |
| C  | -3.1730538 | 1.2349258  | 0.0000000  |
| H  | -3.7661648 | 2.1687481  | 0.0000000  |
| C  | -3.7711122 | 0.0000000  | 0.0000000  |
| H  | -4.8560049 | 0.0000000  | 0.0000000  |
| C  | -3.1730538 | -1.2349258 | 0.0000000  |
| H  | -3.7661648 | -2.1687481 | -0.0000000 |
| Pt | 0.0000000  | 0.0000000  | 0.0000000  |
| S  | 1.5667886  | 1.7937389  | -0.0000000 |
| S  | 1.5667886  | -1.7937389 | 0.0000000  |
| S  | -1.5667886 | 1.7937389  | -0.0000000 |

|   |            |            |            |
|---|------------|------------|------------|
| S | -1.5667886 | -1.7937389 | -0.0000000 |
|---|------------|------------|------------|

#### 16A

|    |            |            |            |
|----|------------|------------|------------|
| C  | 2.5792976  | -1.2399119 | -0.0000000 |
| H  | 3.2300493  | -2.1186361 | 0.0000000  |
| C  | 3.2009632  | 0.0000000  | 0.0000000  |
| C  | 2.5792976  | 1.2399119  | 0.0000000  |
| H  | 3.2300493  | 2.1186361  | 0.0000000  |
| O  | 1.3365021  | -1.4688983 | 0.0000000  |
| O  | 1.3365021  | 1.4688983  | 0.0000000  |
| C  | -2.5792976 | 1.2399119  | -0.0000000 |
| H  | -3.2300493 | 2.1186361  | 0.0000000  |
| C  | -3.2009632 | -0.0000000 | 0.0000000  |
| C  | -2.5792976 | -1.2399119 | 0.0000000  |
| H  | -3.2300493 | -2.1186361 | 0.0000000  |
| O  | -1.3365021 | 1.4688983  | 0.0000000  |
| O  | -1.3365021 | -1.4688983 | 0.0000000  |
| F  | 4.5532105  | 0.0000000  | 0.0000000  |
| F  | -4.5532105 | 0.0000000  | 0.0000000  |
| Pt | 0.0000000  | 0.0000000  | 0.0000000  |

#### 16B

|    |            |            |            |
|----|------------|------------|------------|
| C  | 3.1865625  | -1.2488530 | 0.0000000  |
| H  | 3.8306157  | -2.1398172 | 0.0000000  |
| C  | 3.7613698  | -0.0000000 | 0.0000000  |
| C  | 3.1865625  | 1.2488530  | 0.0000000  |
| H  | 3.8306157  | 2.1398172  | 0.0000000  |
| C  | -3.1865625 | 1.2488530  | 0.0000000  |
| H  | -3.8306157 | 2.1398172  | 0.0000000  |
| C  | -3.7613698 | 0.0000000  | 0.0000000  |
| C  | -3.1865625 | -1.2488530 | 0.0000000  |
| H  | -3.8306157 | -2.1398172 | 0.0000000  |
| F  | 5.1030899  | 0.0000000  | -0.0000000 |
| F  | -5.1030899 | 0.0000000  | 0.0000000  |
| Pt | -0.0000000 | 0.0000000  | 0.0000000  |

|   |            |            |            |
|---|------------|------------|------------|
| S | 1.5731902  | 1.7805340  | -0.0000000 |
| S | 1.5731902  | -1.7805340 | 0.0000000  |
| S | -1.5731902 | 1.7805340  | 0.0000000  |
| S | -1.5731902 | -1.7805340 | -0.0000000 |

#### 17A

|    |             |             |             |
|----|-------------|-------------|-------------|
| C  | -0.36253779 | -0.58912386 | 0.00000000  |
| H  | -0.98829624 | -0.58912386 | -0.89651463 |
| C  | -1.01757456 | -0.58912386 | 1.24317600  |
| C  | -0.36252985 | -0.58912386 | 2.48633666  |
| H  | -0.98829836 | -0.58912386 | 3.38286135  |
| O  | 0.87379119  | -0.58912386 | -0.21405484 |
| O  | 0.87378325  | -0.58912386 | 2.70039944  |
| C  | 4.80236392  | -0.58912386 | 2.48633666  |
| H  | 5.42813242  | -0.58912386 | 3.38286135  |
| C  | 5.45740863  | -0.58912386 | 1.24317600  |
| C  | 4.80237186  | -0.58912386 | 0.00000000  |
| H  | 5.42813031  | -0.58912386 | -0.89651463 |
| O  | 3.56605082  | -0.58912386 | 2.70039944  |
| O  | 3.56604288  | -0.58912386 | -0.21405484 |
| Pt | 2.21991703  | -0.58912386 | 1.24317018  |
| C  | 6.88008261  | -0.58912386 | 1.24317124  |
| C  | -2.44024854 | -0.58912386 | 1.24317124  |
| N  | 8.03244280  | -0.58912386 | 1.24317177  |
| N  | -3.59260873 | -0.58912386 | 1.24317177  |

#### 17B

|   |             |            |             |
|---|-------------|------------|-------------|
| C | -1.23867079 | 0.01510574 | 0.00000000  |
| H | -2.09016143 | 0.01510574 | 0.67705001  |
| C | 0.01419392  | 0.01510574 | 0.61599248  |
| C | 1.26705863  | 0.01510574 | 0.00000000  |
| H | 2.11854927  | 0.01510574 | 0.67705001  |
| C | 1.26707926  | 0.01510574 | -6.18218148 |
| H | 2.11854133  | 0.01510574 | -6.85925900 |
| C | 0.01419392  | 0.01510574 | -6.79822582 |

|    |             |            |             |
|----|-------------|------------|-------------|
| C  | -1.23869143 | 0.01510574 | -6.18218148 |
| H  | -2.09015350 | 0.01510574 | -6.85925900 |
| Pt | 0.01419392  | 0.01510574 | -3.09110159 |
| S  | 1.73746228  | 0.01510574 | -1.58262045 |
| S  | -1.70907444 | 0.01510574 | -1.58262045 |
| S  | -1.70906862 | 0.01510574 | -4.59960494 |
| S  | 1.73745645  | 0.01510574 | -4.59960494 |
| C  | 0.01419392  | 0.01510574 | -8.22815059 |
| C  | 0.01419392  | 0.01510574 | 2.04594530  |
| N  | 0.01419392  | 0.01510574 | -9.38037319 |
| N  | 0.01419392  | 0.01510574 | 3.19817372  |

# 18A

|    |            |            |            |
|----|------------|------------|------------|
| C  | 2.5855452  | -1.2466163 | 0.0000186  |
| H  | 3.2219476  | -2.1321883 | 0.0000011  |
| C  | 3.2229364  | 0.0000000  | -0.0000129 |
| C  | 2.5855452  | 1.2466163  | 0.0000186  |
| H  | 3.2219476  | 2.1321883  | 0.0000011  |
| O  | 1.3480230  | -1.4548580 | 0.0000775  |
| O  | 1.3480230  | 1.4548580  | 0.0000775  |
| C  | -2.5855452 | 1.2466163  | 0.0000186  |
| H  | -3.2219476 | 2.1321883  | 0.0000011  |
| C  | -3.2229364 | 0.0000000  | -0.0000129 |
| C  | -2.5855452 | -1.2466163 | 0.0000186  |
| H  | -3.2219476 | -2.1321883 | 0.0000011  |
| O  | -1.3480230 | 1.4548580  | 0.0000775  |
| O  | -1.3480230 | -1.4548580 | 0.0000775  |
| N  | -4.6739188 | 0.0000000  | -0.0000625 |
| N  | 4.6739188  | 0.0000000  | -0.0000625 |
| O  | -5.2390852 | -1.0745686 | -0.0000815 |
| O  | -5.2390852 | 1.0745686  | -0.0000815 |
| O  | 5.2390852  | -1.0745686 | -0.0000815 |
| O  | 5.2390852  | 1.0745686  | -0.0000815 |
| Pt | 0.0000000  | 0.0000000  | 0.0000880  |

**18B**

|    |            |            |            |
|----|------------|------------|------------|
| C  | 3.0820143  | -1.2626984 | 0.0000126  |
| H  | 3.7888567  | -2.1001927 | -0.0001209 |
| C  | 3.7023978  | 0.0000000  | -0.0000235 |
| C  | 3.0820143  | 1.2626984  | 0.0000126  |
| H  | 3.7888567  | 2.1001927  | -0.0001209 |
| C  | -3.0820143 | 1.2626984  | 0.0000126  |
| H  | -3.7888567 | 2.1001927  | -0.0001209 |
| C  | -3.7023978 | 0.0000000  | -0.0000235 |
| C  | -3.0820143 | -1.2626984 | 0.0000126  |
| H  | -3.7888567 | -2.1001927 | -0.0001209 |
| N  | -5.0458761 | 0.0000000  | -0.0000858 |
| N  | 5.0458761  | 0.0000000  | -0.0000858 |
| O  | -5.7839816 | -1.0517920 | -0.0001143 |
| O  | -5.7839816 | 1.0517920  | -0.0001143 |
| O  | 5.7839816  | -1.0517920 | -0.0001143 |
| O  | 5.7839816  | 1.0517920  | -0.0001143 |
| Pt | 0.0000000  | 0.0000000  | 0.0002184  |
| S  | 1.5091600  | 1.7032298  | 0.0002227  |
| S  | 1.5091600  | -1.7032298 | 0.0002227  |
| S  | -1.5091600 | -1.7032298 | 0.0002227  |
| S  | -1.5091600 | 1.7032298  | 0.0002227  |

**19A**

|   |            |            |            |
|---|------------|------------|------------|
| C | 2.5954382  | -1.2214379 | -0.0000016 |
| H | 3.2116975  | -2.1278356 | 0.0000178  |
| C | 3.2681666  | 0.0000000  | 0.0000885  |
| C | 2.5954382  | 1.2214379  | -0.0000016 |
| H | 3.2116975  | 2.1278356  | 0.0000178  |
| O | 1.3476196  | -1.4501400 | -0.0000297 |
| O | 1.3476196  | 1.4501400  | -0.0000297 |
| C | -2.5954382 | 1.2214379  | -0.0000016 |
| H | -3.2116975 | 2.1278356  | 0.0000178  |
| C | -3.2681666 | -0.0000000 | 0.0000885  |
| C | -2.5954382 | -1.2214379 | -0.0000016 |

|    |            |            |            |
|----|------------|------------|------------|
| H  | -3.2116975 | -2.1278356 | 0.0000178  |
| O  | -1.3476196 | 1.4501400  | -0.0000297 |
| O  | -1.3476196 | -1.4501400 | -0.0000297 |
| N  | -4.6683027 | 0.0000000  | 0.0016787  |
| N  | 4.6683027  | 0.0000000  | 0.0016787  |
| H  | -5.1814828 | 0.8566765  | -0.0008738 |
| H  | -5.1814828 | -0.8566765 | -0.0008738 |
| H  | 5.1814828  | 0.8566765  | -0.0008738 |
| H  | 5.1814828  | -0.8566765 | -0.0008738 |
| Pt | 0.0000000  | 0.0000000  | 0.0000149  |

# 19B

|    |            |            |            |
|----|------------|------------|------------|
| C  | 3.1353458  | -1.2616342 | 0.0000444  |
| H  | 3.7828211  | -2.1321913 | -0.0006613 |
| C  | 3.7526953  | 0.0000000  | 0.0002198  |
| C  | 3.1353458  | 1.2616342  | 0.0000444  |
| H  | 3.7828211  | 2.1321913  | -0.0006613 |
| C  | -3.1353458 | 1.2616342  | 0.0000444  |
| H  | -3.7828211 | 2.1321913  | -0.0006613 |
| C  | -3.7526953 | 0.0000000  | 0.0002198  |
| C  | -3.1353458 | -1.2616342 | 0.0000444  |
| H  | -3.7828211 | -2.1321913 | -0.0006613 |
| N  | -5.1079599 | 0.0000000  | 0.0002359  |
| N  | 5.1079599  | 0.0000000  | 0.0002359  |
| H  | -5.6215576 | 0.8614210  | -0.0002623 |
| H  | -5.6215576 | -0.8614210 | -0.0002623 |
| H  | 5.6215576  | 0.8614210  | -0.0002623 |
| H  | 5.6215576  | -0.8614210 | -0.0002623 |
| Pt | -0.0000000 | 0.0000000  | 0.0001941  |
| S  | 1.5033132  | 1.6789055  | 0.0006028  |
| S  | 1.5033132  | -1.6789055 | 0.0006028  |
| S  | -1.5033132 | 1.6789055  | 0.0006028  |
| S  | -1.5033132 | -1.6789055 | 0.0006028  |

# 20A



|    |            |            |            |
|----|------------|------------|------------|
| C  | 2.6455115  | -1.0900084 | -0.0006135 |
| H  | 3.3163927  | -1.9559408 | 0.0005258  |
| C  | 3.2436100  | 0.1701061  | -0.0003824 |
| C  | 2.5169507  | 1.3633812  | -0.0019087 |
| H  | 3.1120064  | 2.2818237  | -0.0022801 |
| O  | 1.4178192  | -1.3896692 | -0.0016674 |
| O  | 1.2655799  | 1.5296674  | -0.0028638 |
| C  | -2.6455115 | 1.0900084  | -0.0006135 |
| H  | -3.3163927 | 1.9559408  | 0.0005258  |
| C  | -3.2436100 | -0.1701061 | -0.0003824 |
| C  | -2.5169507 | -1.3633812 | -0.0019087 |
| H  | -3.1120064 | -2.2818237 | -0.0022801 |
| O  | -1.4178192 | 1.3896692  | -0.0016674 |
| O  | -1.2655799 | -1.5296674 | -0.0028638 |
| N  | -4.6650663 | -0.2897568 | 0.0015822  |
| N  | 4.6650663  | 0.2897568  | 0.0015822  |
| C  | -5.3099038 | 0.1849821  | 1.2067550  |
| H  | -5.2919477 | 1.2836347  | 1.3137951  |
| H  | -6.3570407 | -0.1293308 | 1.2097068  |
| H  | -4.8208619 | -0.2480828 | 2.0804621  |
| C  | -5.3120810 | 0.1792453  | -1.2045492 |
| H  | -4.8329246 | -0.2670973 | -2.0771514 |
| H  | -6.3622063 | -0.1245937 | -1.1977261 |
| H  | -5.2835062 | 1.2765704  | -1.3224814 |
| C  | 5.3099038  | -0.1849821 | 1.2067550  |
| H  | 5.2919477  | -1.2836347 | 1.3137951  |
| H  | 6.3570407  | 0.1293308  | 1.2097068  |
| H  | 4.8208619  | 0.2480828  | 2.0804621  |
| C  | 5.3120810  | -0.1792453 | -1.2045492 |
| H  | 4.8329246  | 0.2670973  | -2.0771514 |
| H  | 6.3622063  | 0.1245937  | -1.1977261 |
| H  | 5.2835062  | -1.2765704 | -1.3224814 |
| Pt | 0.0000000  | 0.0000000  | -0.0024062 |

|    |            |            |            |
|----|------------|------------|------------|
| C  | -1.2247892 | -3.1219982 | -0.0000000 |
| H  | -2.0652086 | -3.8133393 | 0.0000000  |
| C  | 0.0715262  | -3.6317006 | -0.0000000 |
| C  | 1.3356856  | -3.0591950 | 0.0000000  |
| H  | 2.2123604  | -3.7042397 | 0.0000000  |
| C  | 1.2247892  | 3.1219982  | 0.0000000  |
| H  | 2.0652086  | 3.8133393  | 0.0000000  |
| C  | -0.0715262 | 3.6317006  | 0.0000000  |
| C  | -1.3356856 | 3.0591950  | 0.0000000  |
| H  | -2.2123604 | 3.7042397  | 0.0000000  |
| N  | -0.0896110 | 5.0449269  | 0.0000000  |
| N  | 0.0896110  | -5.0449269 | 0.0000000  |
| C  | 0.1317362  | 5.7245055  | 1.2311975  |
| H  | 1.2112825  | 5.7585413  | 1.4643318  |
| H  | -0.2370429 | 6.7519197  | 1.1799730  |
| H  | -0.3580780 | 5.1753710  | 2.0359585  |
| C  | 0.1317362  | 5.7245055  | -1.2311975 |
| H  | -0.3580780 | 5.1753710  | -2.0359585 |
| H  | -0.2370429 | 6.7519197  | -1.1799730 |
| H  | 1.2112825  | 5.7585413  | -1.4643318 |
| C  | -0.1317362 | -5.7245055 | 1.2311975  |
| H  | -1.2112825 | -5.7585413 | 1.4643318  |
| H  | 0.2370429  | -6.7519197 | 1.1799730  |
| H  | 0.3580780  | -5.1753710 | 2.0359585  |
| C  | -0.1317362 | -5.7245055 | -1.2311975 |
| H  | 0.3580780  | -5.1753710 | -2.0359585 |
| H  | 0.2370429  | -6.7519197 | -1.1799730 |
| H  | -1.2112825 | -5.7585413 | -1.4643318 |
| Pt | 0.0000000  | 0.0000000  | 0.0000000  |
| S  | -1.8930702 | 1.4218617  | 0.0000000  |
| S  | 1.8312976  | 1.4985993  | 0.0000000  |
| S  | -1.8312976 | -1.4985993 | 0.0000000  |
| S  | 1.8930702  | -1.4218617 | 0.0000000  |

|   |            |            |            |
|---|------------|------------|------------|
| C | 2.6014886  | -1.2151770 | -0.0262029 |
| H | 3.1934831  | -2.1322692 | -0.0288711 |
| C | 3.2888443  | 0.0000000  | 0.0142840  |
| C | 2.6014886  | 1.2151770  | -0.0262029 |
| H | 3.1934831  | 2.1322692  | -0.0288711 |
| O | 1.3568823  | -1.4402774 | -0.0629523 |
| O | 1.3568823  | 1.4402774  | -0.0629523 |
| C | -2.6014886 | 1.2151770  | -0.0262029 |
| H | -3.1934831 | 2.1322692  | -0.0288711 |
| C | -3.2888443 | -0.0000000 | 0.0142840  |
| C | -2.6014886 | -1.2151770 | -0.0262029 |
| H | -3.1934831 | -2.1322692 | -0.0288711 |
| O | -1.3568823 | 1.4402774  | -0.0629523 |
| O | -1.3568823 | -1.4402774 | -0.0629523 |
| C | -4.8246117 | 0.0000000  | 0.0177405  |
| C | 4.8246117  | 0.0000000  | 0.0177405  |
| C | -5.3825255 | 1.2305724  | 0.7409991  |
| H | -5.1846418 | 2.1609760  | 0.2051560  |
| H | -6.4681389 | 1.1423896  | 0.8256483  |
| H | -4.9696339 | 1.3200579  | 1.7489093  |
| C | -5.3825255 | -1.2305724 | 0.7409991  |
| H | -6.4681389 | -1.1423896 | 0.8256483  |
| H | -5.1846418 | -2.1609760 | 0.2051560  |
| H | -4.9696339 | -1.3200579 | 1.7489093  |
| C | -5.3395441 | 0.0000000  | -1.4255115 |
| H | -6.4335274 | -0.0000000 | -1.4505944 |
| H | -4.9869081 | 0.8825795  | -1.9651297 |
| H | -4.9869081 | -0.8825795 | -1.9651297 |
| C | 5.3395441  | 0.0000000  | -1.4255115 |
| H | 4.9869081  | 0.8825795  | -1.9651297 |
| H | 6.4335274  | 0.0000000  | -1.4505944 |
| H | 4.9869081  | -0.8825795 | -1.9651297 |
| C | 5.3825255  | 1.2305724  | 0.7409991  |
| H | 6.4681389  | 1.1423896  | 0.8256483  |
| H | 5.1846418  | 2.1609760  | 0.2051560  |

|    |            |            |            |
|----|------------|------------|------------|
| H  | 4.9696339  | 1.3200579  | 1.7489093  |
| C  | 5.3825255  | -1.2305724 | 0.7409991  |
| H  | 4.9696339  | -1.3200579 | 1.7489093  |
| H  | 5.1846418  | -2.1609760 | 0.2051560  |
| H  | 6.4681389  | -1.1423896 | 0.8256483  |
| Pt | -0.0000000 | 0.0000000  | -0.0620643 |

## 21B

|   |            |            |            |
|---|------------|------------|------------|
| C | -1.2234801 | -0.0318454 | 3.1165563  |
| H | -2.1036666 | -0.0324779 | 3.7521013  |
| C | -0.0000185 | 0.0154743  | 3.7737139  |
| C | 1.2234122  | -0.0313906 | 3.1163819  |
| H | 2.1038536  | -0.0321885 | 3.7515367  |
| C | 1.2234122  | -0.0313906 | -3.1163819 |
| H | 2.1038536  | -0.0321885 | -3.7515367 |
| C | -0.0000185 | 0.0154743  | -3.7737139 |
| C | -1.2234801 | -0.0318454 | -3.1165563 |
| H | -2.1036666 | -0.0324779 | -3.7521013 |
| C | -0.0000683 | 0.0282641  | -5.3164393 |
| C | -0.0000683 | 0.0282641  | 5.3164393  |
| C | 1.2307932  | 0.7485147  | -5.8756505 |
| H | 2.1593527  | 0.2049744  | -5.6907692 |
| H | 1.1358750  | 0.8413827  | -6.9596887 |
| H | 1.3302748  | 1.7529304  | -5.4568276 |
| C | -1.2308027 | 0.7488245  | -5.8757345 |
| H | -1.1357048 | 0.8416264  | -6.9597949 |
| H | -2.1594474 | 0.2053441  | -5.6909228 |
| H | -1.3300874 | 1.7532688  | -5.4567740 |
| C | -0.0000455 | -1.4196309 | -5.8170944 |
| H | -0.0000711 | -1.4508180 | -6.9106769 |
| H | 0.8828713  | -1.9559196 | -5.4604889 |
| H | -0.8830081 | -1.9557895 | -5.4605127 |
| C | -0.0000455 | -1.4196309 | 5.8170944  |
| H | 0.8828713  | -1.9559196 | 5.4604889  |
| H | -0.0000711 | -1.4508180 | 6.9106769  |

|    |            |            |            |
|----|------------|------------|------------|
| H  | -0.8830081 | -1.9557895 | 5.4605127  |
| C  | 1.2307932  | 0.7485147  | 5.8756505  |
| H  | 1.1358750  | 0.8413827  | 6.9596887  |
| H  | 2.1593527  | 0.2049744  | 5.6907692  |
| H  | 1.3302748  | 1.7529304  | 5.4568276  |
| C  | -1.2308027 | 0.7488245  | 5.8757345  |
| H  | -1.3300874 | 1.7532688  | 5.4567740  |
| H  | -2.1594474 | 0.2053441  | 5.6909228  |
| H  | -1.1357048 | 0.8416264  | 6.9597949  |
| Pt | 0.0000155  | -0.0873029 | 0.0000000  |
| S  | 1.7009308  | -0.0930369 | -1.5254577 |
| S  | -1.7009709 | -0.0938555 | -1.5255337 |
| S  | -1.7009709 | -0.0938555 | 1.5255337  |
| S  | 1.7009308  | -0.0930369 | 1.5254577  |

## Cartesian coordinates of the optimized pyridine dimers

### 1A:py

|    |            |            |            |
|----|------------|------------|------------|
| C  | 2.5031934  | -1.2102917 | 1.0503173  |
| H  | 3.0956882  | -2.1337376 | 1.0491747  |
| C  | 3.1860078  | -0.0000701 | 1.0101867  |
| H  | 4.2663932  | -0.0000013 | 0.9766180  |
| C  | 2.5031675  | 1.2101626  | 1.0502438  |
| H  | 3.0956183  | 2.1335843  | 1.0504814  |
| O  | 1.2581369  | -1.3768652 | 1.0954963  |
| O  | 1.2580596  | 1.3767482  | 1.0940237  |
| C  | -2.5031559 | 1.2103463  | 1.0503182  |
| H  | -3.0956491 | 2.1337064  | 1.0492831  |
| C  | -3.1859995 | 0.0000206  | 1.0099177  |
| H  | -4.2663329 | 0.0000105  | 0.9764638  |
| C  | -2.5031756 | -1.2101323 | 1.0502711  |
| H  | -3.0955891 | -2.1335866 | 1.0505547  |
| O  | -1.2580915 | 1.3768609  | 1.0953821  |
| O  | -1.2579802 | -1.3767609 | 1.0939875  |
| Ni | 0.0000166  | 0.0000063  | 1.0636826  |
| N  | -0.0000239 | -0.0000094 | -1.5525761 |
| C  | 0.0000222  | -1.1400042 | -2.2324203 |
| C  | -0.0000738 | 1.1400176  | -2.2323972 |
| C  | 0.0000137  | -1.1930377 | -3.6184000 |
| H  | 0.0000618  | -2.0459892 | -1.6324513 |
| C  | -0.0000722 | 1.1930314  | -3.6184068 |
| H  | -0.0001146 | 2.0459699  | -1.6324478 |
| C  | -0.0000333 | 0.0000135  | -4.3238619 |
| H  | 0.0000420  | -2.1482240 | -4.1295717 |
| H  | -0.0000949 | 2.1482259  | -4.1295569 |
| H  | -0.0000347 | 0.0000056  | -5.4080316 |

### 1B:py

|   |           |            |            |
|---|-----------|------------|------------|
| C | 1.2322571 | -3.0439929 | -0.8172292 |
| H | 2.1034087 | -3.6961675 | -0.8129296 |

|    |            |            |            |
|----|------------|------------|------------|
| C  | -0.0000041 | -3.6695682 | -0.7598146 |
| H  | -0.0000021 | -4.7526334 | -0.6996414 |
| C  | -1.2322641 | -3.0439956 | -0.8172436 |
| H  | -2.1034156 | -3.6961726 | -0.8129557 |
| C  | -1.2322622 | 3.0439876  | -0.8172307 |
| H  | -2.1034151 | 3.6961653  | -0.8129447 |
| C  | -0.0000058 | 3.6695575  | -0.7597736 |
| H  | -0.0000015 | 4.7526244  | -0.6996149 |
| C  | 1.2322569  | 3.0439849  | -0.8172305 |
| H  | 2.1034063  | 3.6961604  | -0.8129444 |
| S  | -1.6477132 | -1.4382358 | -0.9134138 |
| S  | 1.6477025  | -1.4382333 | -0.9133976 |
| S  | -1.6477105 | 1.4382303  | -0.9134525 |
| S  | 1.6477003  | 1.4382274  | -0.9134511 |
| Ni | -0.0000059 | -0.0000037 | -0.8555123 |
| N  | 0.0000007  | 0.0000063  | 1.8962171  |
| C  | -1.1383845 | 0.0000058  | 2.5767119  |
| C  | 1.1383904  | 0.0000058  | 2.5767046  |
| C  | -1.1926717 | 0.0000062  | 3.9628009  |
| H  | -2.0476565 | 0.0000040  | 1.9806487  |
| C  | 1.1926873  | 0.0000063  | 3.9627917  |
| H  | 2.0476583  | 0.0000040  | 1.9806340  |
| C  | 0.0000104  | 0.0000067  | 4.6688500  |
| H  | -2.1485867 | 0.0000060  | 4.4727946  |
| H  | 2.1486056  | 0.0000062  | 4.4727805  |
| H  | 0.0000149  | 0.0000079  | 5.7530629  |

## 2A:py

|   |           |            |           |
|---|-----------|------------|-----------|
| C | 2.5017161 | -1.2197181 | 0.8889483 |
| H | 3.1217983 | -2.1234543 | 0.8860082 |
| C | 3.1567820 | 0.0000670  | 0.8387407 |
| C | 2.5015768 | 1.2197578  | 0.8886475 |
| H | 3.1217283 | 2.1234503  | 0.8866522 |
| O | 1.2553392 | -1.3805226 | 0.9452957 |
| O | 1.2551755 | 1.3806903  | 0.9437668 |

|    |            |            |            |
|----|------------|------------|------------|
| C  | -2.5017276 | 1.2196902  | 0.8889527  |
| H  | -3.1218108 | 2.1234363  | 0.8861020  |
| C  | -3.1568026 | -0.0000422 | 0.8387118  |
| C  | -2.5015836 | -1.2198087 | 0.8886384  |
| H  | -3.1217268 | -2.1234587 | 0.8865355  |
| O  | -1.2553536 | 1.3805123  | 0.9451974  |
| O  | -1.2551737 | -1.3806972 | 0.9439385  |
| Ni | -0.0000041 | -0.0000131 | 0.9110531  |
| F  | 4.5074251  | 0.0000601  | 0.7784102  |
| F  | -4.5074216 | -0.0000785 | 0.7783310  |
| N  | 0.0000092  | 0.0000361  | -1.6812692 |
| C  | -0.0002226 | -1.1402154 | -2.3617217 |
| C  | 0.0002394  | 1.1402673  | -2.3617510 |
| C  | -0.0002499 | -1.1930216 | -3.7474185 |
| H  | -0.0004006 | -2.0468065 | -1.7628025 |
| C  | 0.0002570  | 1.1930325  | -3.7474537 |
| H  | 0.0004262  | 2.0468765  | -1.7628647 |
| C  | -0.0000005 | -0.0000082 | -4.4528812 |
| H  | -0.0004689 | -2.1483873 | -4.2581106 |
| H  | 0.0004782  | 2.1483781  | -4.2581784 |
| H  | -0.0000047 | -0.0000224 | -5.5370240 |

## 2B:py

|   |            |            |           |
|---|------------|------------|-----------|
| C | 3.0373418  | -1.2385714 | 0.7068573 |
| H | 3.7216050  | -2.0840738 | 0.7010154 |
| C | 3.6339088  | -0.0000066 | 0.6387401 |
| C | 3.0373371  | 1.2385570  | 0.7068207 |
| H | 3.7216102  | 2.0840447  | 0.7009478 |
| C | -3.0373170 | 1.2385888  | 0.7068523 |
| H | -3.7216081 | 2.0840392  | 0.7010049 |
| C | -3.6339473 | -0.0000069 | 0.6387364 |
| C | -3.0373191 | -1.2385973 | 0.7068295 |
| H | -3.7216042 | -2.0840692 | 0.7009593 |
| F | 4.9840753  | -0.0000088 | 0.5410651 |
| F | -4.9840612 | -0.0000054 | 0.5410655 |



|    |            |            |            |
|----|------------|------------|------------|
| S  | 1.4332206  | 1.6530275  | 0.8181356  |
| S  | 1.4332154  | -1.6530333 | 0.8181947  |
| S  | -1.4332300 | 1.6530216  | 0.8181677  |
| S  | -1.4332234 | -1.6530328 | 0.8181635  |
| Ni | 0.0000011  | -0.0000024 | 0.7551640  |
| N  | -0.0000001 | -0.0000204 | -1.9815179 |
| C  | -0.0000002 | 1.1384566  | -2.6624431 |
| C  | -0.0000004 | -1.1384613 | -2.6624795 |
| C  | -0.0000007 | 1.1926435  | -4.0482735 |
| H  | -0.0000003 | 2.0482549  | -2.0671744 |
| C  | -0.0000005 | -1.1925871 | -4.0483160 |
| H  | -0.0000001 | -2.0482869 | -2.0672394 |
| C  | -0.0000006 | 0.0000336  | -4.7543923 |
| H  | -0.0000008 | 2.1486081  | -4.5579203 |
| H  | -0.0000007 | -2.1485475 | -4.5579960 |
| H  | -0.0000007 | 0.0000355  | -5.8385395 |

### 3A:py

|    |            |            |           |
|----|------------|------------|-----------|
| C  | 2.4993647  | -1.2224071 | 0.8532939 |
| H  | 3.0968097  | -2.1408261 | 0.8511041 |
| C  | 3.1883896  | 0.0000260  | 0.7925665 |
| C  | 2.4993630  | 1.2223823  | 0.8533936 |
| H  | 3.0968120  | 2.1408476  | 0.8512115 |
| O  | 1.2616374  | -1.3705032 | 0.9191147 |
| O  | 1.2616420  | 1.3705149  | 0.9193011 |
| C  | -2.4991667 | 1.2224060  | 0.8528780 |
| H  | -3.0966100 | 2.1408359  | 0.8502527 |
| C  | -3.1881708 | -0.0000204 | 0.7920367 |
| C  | -2.4991554 | -1.2223791 | 0.8528099 |
| H  | -3.0965954 | -2.1408515 | 0.8505124 |
| O  | -1.2614708 | 1.3705146  | 0.9192402 |
| O  | -1.2614351 | -1.3705225 | 0.9187451 |
| Ni | 0.0000938  | 0.0000128  | 0.8758233 |
| C  | -4.6046283 | 0.0000002  | 0.7097273 |
| C  | 4.6048078  | -0.0000089 | 0.7097790 |

|   |            |            |            |
|---|------------|------------|------------|
| N | 5.7556678  | -0.0000392 | 0.6379007  |
| N | -5.7555242 | 0.0000054  | 0.6384736  |
| N | -0.0002741 | 0.0000485  | -1.6665246 |
| C | -0.0002272 | -1.1406922 | -2.3483194 |
| C | -0.0002461 | 1.1407464  | -2.3483840 |
| C | -0.0001374 | -1.1930235 | -3.7333470 |
| H | -0.0002393 | -2.0488823 | -1.7519732 |
| C | -0.0001597 | 1.1930012  | -3.7334185 |
| H | -0.0002700 | 2.0489691  | -1.7520940 |
| C | -0.0000958 | -0.0000356 | -4.4387091 |
| H | -0.0000773 | -2.1484645 | -4.2435261 |
| H | -0.0001191 | 2.1484089  | -4.2436503 |
| H | 0.0000148  | -0.0000641 | -5.5225945 |

### 3B:py

|    |            |            |            |
|----|------------|------------|------------|
| C  | -3.0346945 | 1.2409112  | -0.6894382 |
| H  | -3.6923434 | 2.1073704  | -0.6787780 |
| C  | -3.6656753 | -0.0000171 | -0.6008708 |
| C  | -3.0346938 | -1.2409515 | -0.6894464 |
| H  | -3.6923400 | -2.1074097 | -0.6787937 |
| C  | 3.0343858  | -1.2409346 | -0.6890021 |
| H  | 3.6920749  | -2.1073703 | -0.6790664 |
| C  | 3.6653322  | -0.0000222 | -0.5998666 |
| C  | 3.0343874  | 1.2408997  | -0.6889912 |
| H  | 3.6920773  | 2.1073282  | -0.6790465 |
| Ni | -0.0001559 | -0.0000117 | -0.7582964 |
| C  | 5.0867586  | -0.0000169 | -0.4613808 |
| C  | -5.0871143 | -0.0000167 | -0.4624774 |
| N  | -6.2334928 | -0.0000111 | -0.3441285 |
| N  | 6.2332371  | -0.0000117 | -0.3438274 |
| S  | 1.4392474  | -1.6443542 | -0.8331461 |
| S  | 1.4392507  | 1.6443292  | -0.8331181 |
| S  | -1.4395307 | 1.6443639  | -0.8331826 |
| S  | -1.4395266 | -1.6443892 | -0.8331994 |
| N  | 0.0003341  | 0.0000425  | 1.9309110  |

|   |           |            |           |
|---|-----------|------------|-----------|
| C | 0.0003196 | -1.1387212 | 2.6130192 |
| C | 0.0003180 | 1.1387950  | 2.6130407 |
| C | 0.0002258 | -1.1924964 | 3.9983261 |
| H | 0.0003920 | -2.0499407 | 2.0202047 |
| C | 0.0002238 | 1.1925402  | 3.9983499 |
| H | 0.0003894 | 2.0500352  | 2.0202603 |
| C | 0.0001397 | 0.0000141  | 4.7043774 |
| H | 0.0002346 | -2.1483966 | 4.5077786 |
| H | 0.0002310 | 2.1484350  | 4.5078072 |
| H | 0.0000080 | 0.0000072  | 5.7883357 |

#### 4A:py

|    |            |            |            |
|----|------------|------------|------------|
| C  | 2.4981517  | -1.2281178 | 0.7527522  |
| H  | 3.1075959  | -2.1349680 | 0.7472545  |
| C  | 3.1655526  | 0.0000299  | 0.6738250  |
| C  | 2.4982122  | 1.2281031  | 0.7513337  |
| H  | 3.1077765  | 2.1349195  | 0.7446541  |
| O  | 1.2608539  | -1.3708327 | 0.8388037  |
| O  | 1.2608538  | 1.3711818  | 0.8366019  |
| C  | -2.4982239 | 1.2282520  | 0.7513942  |
| H  | -3.1077753 | 2.1350532  | 0.7449023  |
| C  | -3.1655835 | 0.0000922  | 0.6738871  |
| C  | -2.4981643 | -1.2279733 | 0.7525761  |
| H  | -3.1076377 | -2.1348366 | 0.7469288  |
| O  | -1.2608767 | 1.3712388  | 0.8366317  |
| O  | -1.2608596 | -1.3707974 | 0.8385049  |
| Ni | -0.0000053 | 0.0001654  | 0.7930949  |
| N  | -4.6007739 | -0.0000196 | 0.5595954  |
| N  | 4.6007516  | 0.0000163  | 0.5594726  |
| O  | -5.1661030 | -1.0756466 | 0.5086333  |
| O  | -5.1668518 | 1.0755084  | 0.5149655  |
| O  | 5.1660076  | -1.0755492 | 0.5065132  |
| O  | 5.1668481  | 1.0755749  | 0.5167711  |
| N  | 0.0000032  | -0.0003869 | -1.7401684 |
| C  | -0.0000313 | 1.1406726  | -2.4219308 |

|   |            |            |            |
|---|------------|------------|------------|
| C | 0.0000521  | -1.1412142 | -2.4223000 |
| C | -0.0000166 | 1.1929320  | -3.8068635 |
| H | -0.0000750 | 2.0489833  | -1.8258478 |
| C | 0.0000721  | -1.1930124 | -3.8072498 |
| H | 0.0000771  | -2.0497360 | -1.8265345 |
| C | 0.0000368  | 0.0000624  | -4.5124030 |
| H | -0.0000439 | 2.1484313  | -4.3167217 |
| H | 0.0001235  | -2.1483675 | -4.3174088 |
| H | 0.0000533  | 0.0002410  | -5.5963214 |

#### 4B:py

|    |            |            |            |
|----|------------|------------|------------|
| C  | 3.0259135  | -1.2416402 | 0.6231264  |
| H  | 3.7042441  | -2.0900741 | 0.5969087  |
| C  | 3.6268325  | 0.0001458  | 0.5005461  |
| C  | 3.0261346  | 1.2419517  | 0.6240674  |
| H  | 3.7045347  | 2.0903634  | 0.5984281  |
| C  | -3.0260688 | 1.2418683  | 0.6236384  |
| H  | -3.7044725 | 2.0902635  | 0.5977065  |
| C  | -3.6268355 | 0.0000556  | 0.5005454  |
| C  | -3.0259797 | -1.2417261 | 0.6234898  |
| H  | -3.7043073 | -2.0901768 | 0.5975462  |
| N  | -5.0827689 | 0.0000059  | 0.2903706  |
| N  | 5.0827595  | -0.0000236 | 0.2903324  |
| O  | -5.6412010 | -1.0735874 | 0.2039003  |
| O  | -5.6415635 | 1.0735654  | 0.2058362  |
| O  | 5.6415485  | -1.0736699 | 0.2068160  |
| O  | 5.6411910  | 1.0734802  | 0.2028110  |
| S  | 1.4396465  | 1.6458771  | 0.8285016  |
| S  | 1.4394024  | -1.6456320 | 0.8268661  |
| S  | -1.4394590 | -1.6456211 | 0.8274837  |
| S  | -1.4395790 | 1.6458957  | 0.8277354  |
| Ni | 0.0000017  | 0.0001997  | 0.7496155  |
| N  | 0.0000140  | -0.0000943 | -1.9268406 |
| C  | 0.0000149  | 1.1388705  | -2.6090286 |
| C  | 0.0000020  | -1.1390993 | -2.6089712 |

|   |            |            |            |
|---|------------|------------|------------|
| C | 0.0000058  | 1.1924033  | -3.9942510 |
| H | 0.0000219  | 2.0501641  | -2.0164622 |
| C | -0.0000068 | -1.1927041 | -3.9941912 |
| H | -0.0000000 | -2.0503722 | -2.0163706 |
| C | -0.0000040 | -0.0001685 | -4.7002078 |
| H | 0.0000088  | 2.1483401  | -4.5035689 |
| H | -0.0000196 | -2.1486675 | -4.5034663 |
| H | -0.0000107 | -0.0001931 | -5.7841458 |

# 5A:py

|    |            |            |            |
|----|------------|------------|------------|
| C  | 2.5099571  | -1.2007739 | 1.0208913  |
| H  | 3.1013385  | -2.1272489 | 1.0235356  |
| C  | 3.2089265  | 0.0007720  | 0.9600296  |
| C  | 2.5093706  | 1.2018958  | 1.0233708  |
| H  | 3.1004109  | 2.1285446  | 1.0287425  |
| O  | 1.2611265  | -1.3639053 | 1.0830879  |
| O  | 1.2604097  | 1.3642781  | 1.0837526  |
| C  | -2.5099266 | 1.2006339  | 1.0208470  |
| H  | -3.1012180 | 2.1271757  | 1.0234577  |
| C  | -3.2089533 | -0.0008200 | 0.9599205  |
| C  | -2.5094673 | -1.2020305 | 1.0233497  |
| H  | -3.1005932 | -2.1286012 | 1.0288248  |
| O  | -1.2610547 | 1.3637080  | 1.0832062  |
| O  | -1.2605217 | -1.3644724 | 1.0837159  |
| Ni | -0.0000133 | -0.0001234 | 1.0574603  |
| N  | -4.6354700 | -0.0018165 | 0.9664315  |
| N  | 4.6354624  | 0.0019559  | 0.9665460  |
| H  | -5.0031363 | 0.8152450  | 0.4980405  |
| H  | -5.0024963 | -0.8105779 | 0.4833293  |
| H  | 5.0022446  | 0.8109566  | 0.4837245  |
| H  | 5.0032576  | -0.8148406 | 0.4977566  |
| N  | 0.0000459  | 0.0000033  | -1.5874589 |
| C  | 0.0000097  | -1.1398062 | -2.2671068 |
| C  | 0.0000700  | 1.1398463  | -2.2671096 |
| C  | -0.0000107 | -1.1931436 | -3.6533683 |

|   |            |            |            |
|---|------------|------------|------------|
| H | -0.0000009 | -2.0456456 | -1.6667437 |
| C | 0.0000664  | 1.1931622  | -3.6534037 |
| H | 0.0000919  | 2.0456720  | -1.6667812 |
| C | 0.0000238  | -0.0000158 | -4.3589084 |
| H | -0.0000562 | -2.1485062 | -4.1644706 |
| H | 0.0000898  | 2.1484940  | -4.1644991 |
| H | 0.0000165  | -0.0000154 | -5.4431589 |

# 5B:py

|    |            |            |            |
|----|------------|------------|------------|
| C  | 3.0474478  | -1.2213838 | 0.7826846  |
| H  | 3.6920405  | -2.1001772 | 0.7859139  |
| C  | 3.6971079  | 0.0003776  | 0.6836586  |
| C  | 3.0456980  | 1.2209372  | 0.7862830  |
| H  | 3.6893417  | 2.1003859  | 0.7926495  |
| C  | -3.0459259 | 1.2204704  | 0.7855448  |
| H  | -3.6897447 | 2.0998430  | 0.7906607  |
| C  | -3.6970333 | -0.0002471 | 0.6835403  |
| C  | -3.0472055 | -1.2218396 | 0.7841698  |
| H  | -3.6916087 | -2.1007224 | 0.7887309  |
| N  | -5.1087016 | 0.0012325  | 0.6007200  |
| N  | 5.1087838  | 0.0025151  | 0.6013004  |
| H  | -5.4730038 | 0.8252978  | 0.1463781  |
| H  | -5.4749405 | -0.8194243 | 0.1419060  |
| H  | 5.4729330  | 0.8230805  | 0.1404814  |
| H  | 5.4756891  | -0.8216632 | 0.1493696  |
| S  | 1.4403208  | 1.6288809  | 0.9363555  |
| S  | 1.4425074  | -1.6324287 | 0.9328660  |
| S  | -1.4406615 | 1.6287211  | 0.9364734  |
| S  | -1.4422252 | -1.6325310 | 0.9341915  |
| Ni | 0.0000197  | -0.0024783 | 0.8750970  |
| N  | -0.0000757 | 0.0008508  | -1.9137118 |
| C  | -0.0001508 | -1.1378218 | -2.5930420 |
| C  | 0.0000155  | 1.1389417  | -2.5940614 |
| C  | -0.0001974 | -1.1929146 | -3.9793976 |
| H  | -0.0001650 | -2.0460403 | -1.9950777 |

|   |            |            |            |
|---|------------|------------|------------|
| C | 0.0000336  | 1.1927976  | -3.9805406 |
| H | 0.0000877  | 2.0475167  | -1.9965830 |
| C | -0.0000995 | -0.0004188 | -4.6860178 |
| H | -0.0003164 | -2.1489706 | -4.4893136 |
| H | 0.0001546  | 2.1483249  | -4.4915004 |
| H | -0.0001257 | -0.0011121 | -5.7703296 |

#### 6A:py

|    |            |            |           |
|----|------------|------------|-----------|
| C  | 2.5152927  | -1.1991795 | 0.8380053 |
| H  | 3.0756149  | -2.1372409 | 0.8498626 |
| C  | 3.2295133  | -0.0001086 | 0.7256799 |
| C  | 2.5153581  | 1.1989866  | 0.8380271 |
| H  | 3.0757924  | 2.1369765  | 0.8500337 |
| O  | 1.2664593  | -1.3463649 | 0.9424602 |
| O  | 1.2665242  | 1.3462499  | 0.9423906 |
| C  | -2.5154587 | 1.1991196  | 0.8378216 |
| H  | -3.0758137 | 2.1371818  | 0.8496331 |
| C  | -3.2296665 | 0.0000270  | 0.7255239 |
| C  | -2.5155337 | -1.1990690 | 0.8379400 |
| H  | -3.0759435 | -2.1370924 | 0.8500109 |
| O  | -1.2666324 | 1.3462841  | 0.9423517 |
| O  | -1.2666876 | -1.3463156 | 0.9422747 |
| Ni | -0.0000700 | -0.0000410 | 0.9092916 |
| N  | -4.6373111 | 0.0000231  | 0.5202289 |
| N  | 4.6371424  | -0.0001373 | 0.5204168 |
| C  | -5.3279676 | -1.2060322 | 0.9042580 |
| H  | -5.1618890 | -1.4928961 | 1.9572456 |
| H  | -6.3979820 | -1.0607571 | 0.7546222 |
| H  | -5.0308342 | -2.0476286 | 0.2735798 |
| C  | -5.3279593 | 1.2059063  | 0.9047562 |
| H  | -5.0309398 | 2.0477278  | 0.2743391 |
| H  | -6.3979814 | 1.0606865  | 0.7552212 |
| H  | -5.1617187 | 1.4923971  | 1.9578140 |
| C  | 5.3277967  | 1.2058338  | 0.9046848 |
| H  | 5.1616185  | 1.4924975  | 1.9576996 |

|   |            |            |            |
|---|------------|------------|------------|
| H | 6.3978306  | 1.0606071  | 0.7551038  |
| H | 5.0307040  | 2.0475116  | 0.2741280  |
| C | 5.3277527  | -1.2061085 | 0.9047324  |
| H | 5.0306868  | -2.0478204 | 0.2742036  |
| H | 6.3977752  | -1.0609155 | 0.7552054  |
| H | 5.1615552  | -1.4927662 | 1.9577480  |
| N | 0.0000623  | 0.0000253  | -1.7561042 |
| C | 0.0001218  | -1.1393615 | -2.4364577 |
| C | 0.0000239  | 1.1393878  | -2.4364837 |
| C | 0.0001777  | -1.1929071 | -3.8226870 |
| H | 0.0000855  | -2.0459313 | -1.8372444 |
| C | 0.0000454  | 1.1928861  | -3.8227154 |
| H | -0.0001400 | 2.0459722  | -1.8372974 |
| C | 0.0001078  | -0.0000159 | -4.5284027 |
| H | 0.0002142  | -2.1483461 | -4.3336150 |
| H | -0.0000305 | 2.1483128  | -4.3336689 |
| H | 0.0000195  | -0.0000201 | -5.6126871 |

# 6B:py

|   |            |            |            |
|---|------------|------------|------------|
| C | -1.2154880 | -3.0614210 | -0.8187101 |
| H | -2.1143032 | -3.6664821 | -0.8513192 |
| C | 0.0000061  | -3.7418398 | -0.7495804 |
| C | 1.2154926  | -3.0614101 | -0.8187195 |
| H | 2.1142904  | -3.6664771 | -0.8513277 |
| C | 1.2154966  | 3.0614119  | -0.8187189 |
| H | 2.1142896  | 3.6664756  | -0.8513275 |
| C | -0.0000021 | 3.7418342  | -0.7495809 |
| C | -1.2154777 | 3.0614250  | -0.8187104 |
| H | -2.1143053 | 3.6664834  | -0.8513195 |
| N | -0.0000112 | 5.1457887  | -0.6309987 |
| N | -0.0000120 | -5.1457852 | -0.6309982 |
| C | 1.2175303  | 5.8465413  | -0.9541790 |
| H | 1.5767950  | 5.6522889  | -1.9777588 |
| H | 1.0441010  | 6.9172436  | -0.8537535 |
| H | 2.0200315  | 5.5895067  | -0.2577421 |



|    |            |            |            |
|----|------------|------------|------------|
| C  | -1.2175063 | 5.8465507  | -0.9541804 |
| H  | -2.0200406 | 5.5895031  | -0.2577405 |
| H  | -1.0441041 | 6.9172347  | -0.8537570 |
| H  | -1.5767945 | 5.6522873  | -1.9777648 |
| C  | -1.2175073 | -5.8465526 | -0.9541807 |
| H  | -1.5767942 | -5.6522869 | -1.9777646 |
| H  | -1.0441037 | -6.9172349 | -0.8537568 |
| H  | -2.0200400 | -5.5895027 | -0.2577403 |
| C  | 1.2175292  | -5.8465414 | -0.9541797 |
| H  | 2.0200325  | -5.5895069 | -0.2577419 |
| H  | 1.0441020  | -6.9172428 | -0.8537539 |
| H  | 1.5767954  | -5.6522891 | -1.9777590 |
| S  | -1.6116591 | 1.4457470  | -0.8798198 |
| S  | 1.6116652  | 1.4457690  | -0.8798274 |
| S  | -1.6116597 | -1.4457503 | -0.8798203 |
| S  | 1.6116641  | -1.4457684 | -0.8798270 |
| Ni | 0.0000033  | 0.0000003  | -0.8080211 |
| N  | -0.0000048 | -0.0000000 | 2.0375199  |
| C  | -1.1378973 | 0.0000001  | 2.7184345  |
| C  | 1.1378954  | 0.0000000  | 2.7184271  |
| C  | -1.1925416 | 0.0000000  | 4.1050402  |
| H  | -2.0470354 | -0.0000001 | 2.1218888  |
| C  | 1.1925532  | 0.0000000  | 4.1050366  |
| H  | 2.0470248  | 0.0000002  | 2.1218885  |
| C  | -0.0000069 | -0.0000000 | 4.8113919  |
| H  | -2.1483066 | -0.0000000 | 4.6155656  |
| H  | 2.1483016  | 0.0000000  | 4.6155582  |
| H  | 0.0000020  | -0.0000000 | 5.8958124  |

#### 7A:py

|   |           |            |            |
|---|-----------|------------|------------|
| C | 2.5119912 | -1.1957678 | -0.6968037 |
| H | 3.0751500 | -2.1338178 | -0.7271995 |
| C | 3.2324884 | 0.0000252  | -0.7196990 |
| C | 2.5120193 | 1.1957322  | -0.6968033 |
| H | 3.0751385 | 2.1338192  | -0.7271830 |

|    |            |            |            |
|----|------------|------------|------------|
| O  | 1.2639954  | -1.3543474 | -0.6448206 |
| O  | 1.2639714  | 1.3543668  | -0.6448187 |
| C  | -2.5119761 | 1.1957055  | -0.6967935 |
| H  | -3.0751289 | 2.1338431  | -0.7271834 |
| C  | -3.2324481 | -0.0000227 | -0.7196657 |
| C  | -2.5120279 | -1.1956597 | -0.6967859 |
| H  | -3.0751551 | -2.1338542 | -0.7272090 |
| O  | -1.2639863 | 1.3543632  | -0.6447769 |
| O  | -1.2639823 | -1.3543480 | -0.6447465 |
| Ni | 0.0000060  | 0.0000178  | -0.6031600 |
| C  | -4.7551174 | 0.0000107  | -0.8682905 |
| C  | 4.7551085  | -0.0000019 | -0.8682982 |
| C  | -5.3817948 | 1.2312784  | -0.2070074 |
| H  | -5.1081540 | 2.1615571  | -0.7084505 |
| H  | -6.4712926 | 1.1567656  | -0.2504200 |
| H  | -5.0873960 | 1.3085160  | 0.8426043  |
| C  | -5.3817815 | -1.2312849 | -0.2070059 |
| H  | -6.4712991 | -1.1567677 | -0.2504173 |
| H  | -5.1081705 | -2.1615664 | -0.7084374 |
| H  | -5.0874094 | -1.3085164 | 0.8426093  |
| C  | -5.1178692 | -0.0000066 | -2.3581200 |
| H  | -6.2029782 | -0.0000001 | -2.5013226 |
| H  | -4.7081788 | 0.8821971  | -2.8564395 |
| H  | -4.7081848 | -0.8821963 | -2.8564463 |
| C  | 5.1178659  | -0.0000009 | -2.3581207 |
| H  | 4.7081823  | 0.8821989  | -2.8564359 |
| H  | 6.2029682  | -0.0000006 | -2.5013292 |
| H  | 4.7081835  | -0.8821940 | -2.8564425 |
| C  | 5.3817828  | 1.2312883  | -0.2070107 |
| H  | 6.4712924  | 1.1567669  | -0.2504256 |
| H  | 5.1081576  | 2.1615536  | -0.7084543 |
| H  | 5.0874023  | 1.3085218  | 0.8426038  |
| C  | 5.3817895  | -1.2312816 | -0.2070086 |
| H  | 5.0874033  | -1.3085161 | 0.8426146  |
| H  | 5.1081662  | -2.1615601 | -0.7084423 |

|   |            |            |            |
|---|------------|------------|------------|
| H | 6.4712895  | -1.1567661 | -0.2504154 |
| N | -0.0000009 | -0.0000107 | 2.0418205  |
| C | -0.0000024 | -1.1397007 | 2.7220757  |
| C | -0.0000011 | 1.1396937  | 2.7220871  |
| C | -0.0000023 | -1.1929761 | 4.1084019  |
| H | -0.0000040 | -2.0461741 | 2.1228433  |
| C | -0.0000017 | 1.1929655  | 4.1083798  |
| H | -0.0000025 | 2.0461521  | 2.1228289  |
| C | -0.0000022 | 0.0000059  | 4.8140900  |
| H | -0.0000024 | -2.1483969 | 4.6193976  |
| H | -0.0000014 | 2.1483983  | 4.6193819  |
| H | -0.0000002 | -0.0000074 | 5.8983723  |

# **7B:py**

|   |            |            |            |
|---|------------|------------|------------|
| C | 3.0239532  | -1.2106691 | -0.9401980 |
| H | 3.6476843  | -2.0992551 | -0.9071885 |
| C | 3.6626110  | 0.0000089  | -0.7070685 |
| C | 3.0240404  | 1.2106902  | -0.9402032 |
| H | 3.6478418  | 2.0992489  | -0.9071831 |
| C | -3.0239626 | 1.2107538  | -0.9401160 |
| H | -3.6477195 | 2.0993460  | -0.9069884 |
| C | -3.6625648 | 0.0000697  | -0.7070756 |
| C | -3.0239569 | -1.2105839 | -0.9403793 |
| H | -3.6477185 | -2.0991668 | -0.9074826 |
| C | -5.1586989 | -0.0000098 | -0.3477144 |
| C | 5.1587393  | -0.0000374 | -0.3477200 |
| C | -5.5282639 | 1.2314939  | 0.4846813  |
| H | -5.4543472 | 2.1612964  | -0.0823866 |
| H | -6.5651054 | 1.1489710  | 0.8193294  |
| H | -4.8911436 | 1.3177101  | 1.3682256  |
| C | -5.5280942 | -1.2314852 | 0.4848154  |
| H | -6.5649765 | -1.1490698 | 0.8194263  |
| H | -5.4540257 | -2.1613377 | -0.0821495 |
| H | -4.8910126 | -1.3174969 | 1.3683834  |
| C | -5.9844698 | -0.0001083 | -1.6377748 |

|    |            |            |            |
|----|------------|------------|------------|
| H  | -7.0550797 | -0.0001587 | -1.4132948 |
| H  | -5.7623349 | 0.8825247  | -2.2426219 |
| H  | -5.7622552 | -0.8827806 | -2.2425486 |
| C  | 5.9844895  | -0.0000452 | -1.6377996 |
| H  | 5.7622850  | 0.8826079  | -2.2425994 |
| H  | 7.0551111  | -0.0000479 | -1.4133705 |
| H  | 5.7622840  | -0.8826969 | -2.2426052 |
| C  | 5.5281740  | 1.2314853  | 0.4847083  |
| H  | 6.5650294  | 1.1491410  | 0.8193733  |
| H  | 5.4541057  | 2.1612736  | -0.0823562 |
| H  | 4.8910209  | 1.3176069  | 1.3682349  |
| C  | 5.5281440  | -1.2315433 | 0.4847457  |
| H  | 4.8910129  | -1.3176151 | 1.3682869  |
| H  | 5.4540548  | -2.1613537 | -0.0822815 |
| H  | 6.5650106  | -1.1491981 | 0.8193981  |
| S  | -1.4543360 | 1.6168231  | -1.3107518 |
| S  | -1.4543071 | -1.6165475 | -1.3109851 |
| S  | 1.4542889  | -1.6166211 | -1.3107215 |
| S  | 1.4544127  | 1.6167858  | -1.3107685 |
| Ni | 0.0000233  | 0.0001365  | -1.2403766 |
| N  | -0.0000115 | 0.0000226  | 1.5084904  |
| C  | -0.0000414 | 1.1387307  | 2.1880526  |
| C  | 0.0000359  | -1.1387127 | 2.1879967  |
| C  | -0.0000358 | 1.1929124  | 3.5743619  |
| H  | -0.0000758 | 2.0466683  | 1.5898611  |
| C  | 0.0000587  | -1.1929524 | 3.5743084  |
| H  | 0.0000559  | -2.0466232 | 1.5897652  |
| C  | 0.0000171  | -0.0000471 | 4.2802538  |
| H  | -0.0000774 | 2.1486470  | 4.0847852  |
| H  | 0.0001078  | -2.1487238 | 4.0846827  |
| H  | 0.0000226  | -0.0000674 | 5.3645384  |

#### 8A:py

|   |           |            |           |
|---|-----------|------------|-----------|
| C | 2.5834611 | -1.2309607 | 1.7570738 |
| H | 3.2157465 | -2.1270420 | 1.7344072 |

|    |            |            |            |
|----|------------|------------|------------|
| C  | 3.2322230  | 0.0000000  | 1.7105393  |
| H  | 4.3122273  | 0.0000000  | 1.6522808  |
| C  | 2.5834611  | 1.2309607  | 1.7570738  |
| H  | 3.2157465  | 2.1270420  | 1.7344072  |
| O  | 1.3503996  | -1.4650449 | 1.8269444  |
| O  | 1.3503996  | 1.4650449  | 1.8269444  |
| C  | -2.5834611 | 1.2309607  | 1.7570738  |
| H  | -3.2157465 | 2.1270420  | 1.7344072  |
| C  | -3.2322230 | 0.0000000  | 1.7105393  |
| H  | -4.3122273 | 0.0000000  | 1.6522808  |
| C  | -2.5834611 | -1.2309607 | 1.7570738  |
| H  | -3.2157465 | -2.1270420 | 1.7344072  |
| O  | -1.3503996 | 1.4650449  | 1.8269444  |
| O  | -1.3503996 | -1.4650449 | 1.8269444  |
| Pd | 0.0000000  | 0.0000000  | 1.8320181  |
| N  | -0.0000000 | 0.0000000  | -1.1236612 |
| C  | 0.0000000  | -1.1383337 | -1.8061688 |
| C  | 0.0000000  | 1.1383337  | -1.8061688 |
| C  | 0.0000000  | -1.1925376 | -3.1926355 |
| H  | -0.0000000 | -2.0477889 | -1.2110898 |
| C  | -0.0000000 | 1.1925376  | -3.1926355 |
| H  | -0.0000000 | 2.0477889  | -1.2110898 |
| C  | -0.0000000 | 0.0000000  | -3.8987644 |
| H  | 0.0000000  | -2.1482590 | -3.7030805 |
| H  | 0.0000000  | 2.1482590  | -3.7030805 |
| H  | -0.0000000 | 0.0000000  | -4.9829849 |

# 8B:py

|   |            |            |           |
|---|------------|------------|-----------|
| C | -3.1080819 | 1.2445484  | 1.7942476 |
| H | -3.7870502 | 2.0954668  | 1.7774745 |
| C | -3.7148432 | 0.0000000  | 1.7538141 |
| H | -4.7986749 | 0.0000000  | 1.7015533 |
| C | -3.1080819 | -1.2445484 | 1.7942476 |
| H | -3.7870502 | -2.0954668 | 1.7774745 |
| C | 3.1080819  | -1.2445484 | 1.7942476 |

|    |            |            |            |
|----|------------|------------|------------|
| H  | 3.7870502  | -2.0954668 | 1.7774745  |
| C  | 3.7148432  | 0.0000000  | 1.7538141  |
| H  | 4.7986749  | 0.0000000  | 1.7015533  |
| C  | 3.1080819  | 1.2445484  | 1.7942476  |
| H  | 3.7870502  | 2.0954668  | 1.7774745  |
| S  | -1.5208849 | -1.7233649 | 1.8740330  |
| S  | -1.5208849 | 1.7233649  | 1.8740330  |
| S  | 1.5208849  | -1.7233649 | 1.8740330  |
| S  | 1.5208849  | 1.7233649  | 1.8740330  |
| Pd | 0.0000000  | 0.0000000  | 1.8628171  |
| N  | 0.0000000  | 0.0000000  | -1.1895195 |
| C  | -0.0000000 | 1.1375611  | -1.8718184 |
| C  | -0.0000000 | -1.1375611 | -1.8718184 |
| C  | -0.0000000 | 1.1925699  | -3.2583407 |
| H  | 0.0000000  | 2.0485296  | -1.2782715 |
| C  | -0.0000000 | -1.1925699 | -3.2583407 |
| H  | 0.0000000  | -2.0485296 | -1.2782715 |
| C  | 0.0000000  | 0.0000000  | -3.9645457 |
| H  | 0.0000000  | 2.1485707  | -3.7684546 |
| H  | 0.0000000  | -2.1485707 | -3.7684546 |
| H  | 0.0000000  | 0.0000000  | -5.0487365 |

# **9A:py**

|   |            |            |           |
|---|------------|------------|-----------|
| C | 2.5827108  | -1.2391921 | 1.7542515 |
| H | 3.2429028  | -2.1137158 | 1.7373951 |
| C | 3.2067330  | 0.0000000  | 1.7184341 |
| C | 2.5827108  | 1.2391921  | 1.7542515 |
| H | 3.2429028  | 2.1137158  | 1.7373951 |
| O | 1.3469312  | -1.4685917 | 1.8072795 |
| O | 1.3469312  | 1.4685917  | 1.8072795 |
| C | -2.5827108 | 1.2391921  | 1.7542515 |
| H | -3.2429028 | 2.1137158  | 1.7373951 |
| C | -3.2067330 | 0.0000000  | 1.7184341 |
| C | -2.5827108 | -1.2391921 | 1.7542515 |
| H | -3.2429028 | -2.1137158 | 1.7373951 |

|    |            |            |            |
|----|------------|------------|------------|
| O  | -1.3469312 | 1.4685917  | 1.8072795  |
| O  | -1.3469312 | -1.4685917 | 1.8072795  |
| F  | 4.5601829  | 0.0000000  | 1.6604784  |
| F  | -4.5601829 | 0.0000000  | 1.6604784  |
| Pd | 0.0000000  | 0.0000000  | 1.8081643  |
| N  | 0.0000000  | 0.0000000  | -1.1171255 |
| C  | 0.0000000  | 1.1386606  | -1.7999514 |
| C  | -0.0000000 | -1.1386606 | -1.7999514 |
| C  | -0.0000000 | 1.1925711  | -3.1861431 |
| H  | -0.0000000 | 2.0485147  | -1.2055582 |
| C  | -0.0000000 | -1.1925711 | -3.1861431 |
| H  | -0.0000000 | -2.0485147 | -1.2055582 |
| C  | -0.0000000 | 0.0000000  | -3.8921757 |
| H  | -0.0000000 | 2.1482976  | -3.6963856 |
| H  | -0.0000000 | -2.1482976 | -3.6963856 |
| H  | -0.0000000 | 0.0000000  | -4.9763157 |

**9B:py**

|    |            |            |           |
|----|------------|------------|-----------|
| C  | -3.1012564 | 1.2497393  | 1.7894338 |
| H  | -3.8112111 | 2.0743604  | 1.7750278 |
| C  | -3.6815075 | 0.0000000  | 1.7496564 |
| C  | -3.1012564 | -1.2497393 | 1.7894338 |
| H  | -3.8112111 | -2.0743604 | 1.7750278 |
| C  | 3.1012564  | -1.2497393 | 1.7894338 |
| H  | 3.8112111  | -2.0743604 | 1.7750278 |
| C  | 3.6815075  | 0.0000000  | 1.7496564 |
| C  | 3.1012564  | 1.2497393  | 1.7894338 |
| H  | 3.8112111  | 2.0743604  | 1.7750278 |
| F  | -5.0358978 | 0.0000000  | 1.6841031 |
| F  | 5.0358978  | 0.0000000  | 1.6841031 |
| S  | -1.5145509 | -1.7283191 | 1.8648362 |
| S  | -1.5145509 | 1.7283191  | 1.8648362 |
| S  | 1.5145509  | -1.7283191 | 1.8648362 |
| S  | 1.5145509  | 1.7283191  | 1.8648362 |
| Pd | 0.0000000  | 0.0000000  | 1.8507265 |

|   |            |            |            |
|---|------------|------------|------------|
| N | 0.0000000  | 0.0000000  | -1.1782312 |
| C | 0.0000000  | 1.1376152  | -1.8608749 |
| C | 0.0000000  | -1.1376152 | -1.8608749 |
| C | -0.0000000 | 1.1924696  | -3.2471787 |
| H | -0.0000000 | 2.0488632  | -1.2677882 |
| C | -0.0000000 | -1.1924696 | -3.2471787 |
| H | -0.0000000 | -2.0488632 | -1.2677882 |
| C | -0.0000000 | 0.0000000  | -3.9534362 |
| H | -0.0000000 | 2.1483457  | -3.7572399 |
| H | -0.0000000 | -2.1483457 | -3.7572399 |
| H | 0.0000000  | 0.0000000  | -5.0376061 |

#### 10A:py

|    |            |            |            |
|----|------------|------------|------------|
| C  | -2.5838501 | 1.2427651  | 1.6292366  |
| H  | -3.2186261 | 2.1353673  | 1.6019691  |
| C  | -3.2407430 | 0.0000000  | 1.5664028  |
| C  | -2.5838501 | -1.2427651 | 1.6292366  |
| H  | -3.2186261 | -2.1353673 | 1.6019691  |
| O  | -1.3569310 | 1.4565026  | 1.7184744  |
| O  | -1.3569310 | -1.4565026 | 1.7184744  |
| C  | 2.5838501  | -1.2427651 | 1.6292366  |
| H  | 3.2186261  | -2.1353673 | 1.6019691  |
| C  | 3.2407430  | 0.0000000  | 1.5664028  |
| C  | 2.5838501  | 1.2427651  | 1.6292366  |
| H  | 3.2186261  | 2.1353673  | 1.6019691  |
| O  | 1.3569310  | -1.4565026 | 1.7184744  |
| O  | 1.3569310  | 1.4565026  | 1.7184744  |
| Pd | 0.0000000  | 0.0000000  | 1.7203858  |
| C  | 4.6578490  | 0.0000000  | 1.4551911  |
| C  | -4.6578490 | 0.0000000  | 1.4551911  |
| N  | 5.8068787  | 0.0000000  | 1.3609370  |
| N  | -5.8068787 | 0.0000000  | 1.3609370  |
| N  | -0.0000000 | 0.0000000  | -1.1636258 |
| C  | -0.0000000 | -1.1390002 | -1.8475196 |
| C  | -0.0000000 | 1.1390002  | -1.8475196 |



|   |            |            |            |
|---|------------|------------|------------|
| C | 0.0000000  | -1.1925411 | -3.2331776 |
| H | -0.0000000 | -2.0500983 | -1.2551147 |
| C | -0.0000000 | 1.1925411  | -3.2331776 |
| H | -0.0000000 | 2.0500983  | -1.2551147 |
| C | 0.0000000  | 0.0000000  | -3.9390745 |
| H | 0.0000000  | -2.1480895 | -3.7434133 |
| H | 0.0000000  | 2.1480895  | -3.7434133 |
| H | 0.0000000  | 0.0000000  | -5.0230176 |

# 10B:py

|    |            |            |            |
|----|------------|------------|------------|
| C  | 3.1016513  | -1.2529468 | 1.6543657  |
| H  | 3.7837278  | -2.1008225 | 1.6321789  |
| C  | 3.7170026  | 0.0000000  | 1.5923811  |
| C  | 3.1016513  | 1.2529468  | 1.6543657  |
| H  | 3.7837278  | 2.1008225  | 1.6321789  |
| C  | -3.1016513 | 1.2529468  | 1.6543657  |
| H  | -3.7837278 | 2.1008225  | 1.6321789  |
| C  | -3.7170026 | 0.0000000  | 1.5923811  |
| C  | -3.1016513 | -1.2529468 | 1.6543657  |
| H  | -3.7837278 | -2.1008225 | 1.6321789  |
| S  | 1.5226604  | 1.7183774  | 1.7679672  |
| S  | 1.5226604  | -1.7183774 | 1.7679672  |
| S  | -1.5226604 | -1.7183774 | 1.7679672  |
| S  | -1.5226604 | 1.7183774  | 1.7679672  |
| Pd | 0.0000000  | 0.0000000  | 1.7480992  |
| C  | -5.1422847 | 0.0000000  | 1.4817990  |
| C  | 5.1422847  | 0.0000000  | 1.4817990  |
| N  | -6.2909825 | 0.0000000  | 1.3883968  |
| N  | 6.2909825  | 0.0000000  | 1.3883968  |
| N  | 0.0000000  | 0.0000000  | -1.2190157 |
| C  | -0.0000000 | 1.1378955  | -1.9023968 |
| C  | -0.0000000 | -1.1378955 | -1.9023968 |
| C  | 0.0000000  | 1.1924583  | -3.2882162 |
| H  | 0.0000000  | 2.0502697  | -1.3111325 |
| C  | 0.0000000  | -1.1924583 | -3.2882162 |

|   |           |            |            |
|---|-----------|------------|------------|
| H | 0.0000000 | -2.0502697 | -1.3111325 |
| C | 0.0000000 | 0.0000000  | -3.9943656 |
| H | 0.0000000 | 2.1483046  | -3.7980337 |
| H | 0.0000000 | -2.1483046 | -3.7980337 |
| H | 0.0000000 | 0.0000000  | -5.0783604 |

# **11A:py**

|    |            |            |            |
|----|------------|------------|------------|
| C  | 2.5860409  | -1.2465442 | 1.5376383  |
| H  | 3.2305851  | -2.1281295 | 1.5050272  |
| C  | 3.2240361  | 0.0000000  | 1.4583665  |
| C  | 2.5860409  | 1.2465442  | 1.5376383  |
| H  | 3.2305851  | 2.1281295  | 1.5050272  |
| O  | 1.3594302  | -1.4537476 | 1.6478882  |
| O  | 1.3594302  | 1.4537476  | 1.6478882  |
| C  | -2.5860409 | 1.2465442  | 1.5376383  |
| H  | -3.2305851 | 2.1281295  | 1.5050272  |
| C  | -3.2240361 | -0.0000000 | 1.4583665  |
| C  | -2.5860409 | -1.2465442 | 1.5376383  |
| H  | -3.2305851 | -2.1281295 | 1.5050272  |
| O  | -1.3594302 | 1.4537476  | 1.6478882  |
| O  | -1.3594302 | -1.4537476 | 1.6478882  |
| N  | -4.6636584 | -0.0000000 | 1.3142286  |
| N  | 4.6636584  | 0.0000000  | 1.3142286  |
| O  | -5.2294867 | -1.0742737 | 1.2552473  |
| O  | -5.2294867 | 1.0742737  | 1.2552473  |
| O  | 5.2294867  | -1.0742737 | 1.2552473  |
| O  | 5.2294867  | 1.0742737  | 1.2552473  |
| Pd | 0.0000000  | 0.0000000  | 1.6506351  |
| N  | 0.0000000  | 0.0000000  | -1.2268853 |
| C  | 0.0000000  | 1.1391765  | -1.9108217 |
| C  | 0.0000000  | -1.1391765 | -1.9108217 |
| C  | 0.0000000  | 1.1926674  | -3.2963788 |
| H  | -0.0000000 | 2.0506279  | -1.3189913 |
| C  | 0.0000000  | -1.1926674 | -3.2963788 |
| H  | -0.0000000 | -2.0506279 | -1.3189913 |

|   |            |            |            |
|---|------------|------------|------------|
| C | 0.0000000  | 0.0000000  | -4.0022057 |
| H | -0.0000000 | 2.1487130  | -3.8057221 |
| H | -0.0000000 | -2.1487130 | -3.8057221 |
| H | 0.0000000  | 0.0000000  | -5.0861107 |

# 11B:py

|    |            |            |            |
|----|------------|------------|------------|
| C  | 3.1215000  | -1.2530726 | 1.5814594  |
| H  | 3.8403849  | -2.0857546 | 1.5566929  |
| C  | 3.7469717  | -0.0000000 | 1.5295070  |
| C  | 3.1215000  | 1.2530726  | 1.5814594  |
| H  | 3.8403849  | 2.0857546  | 1.5566929  |
| C  | -3.1215000 | 1.2530726  | 1.5814594  |
| H  | -3.8403849 | 2.0857546  | 1.5566929  |
| C  | -3.7469717 | 0.0000000  | 1.5295070  |
| C  | -3.1215000 | -1.2530726 | 1.5814594  |
| H  | -3.8403849 | -2.0857546 | 1.5566929  |
| N  | -5.0965001 | 0.0000000  | 1.4539947  |
| N  | 5.0965001  | 0.0000000  | 1.4539947  |
| O  | -5.7981758 | -1.0708731 | 1.4180157  |
| O  | -5.7981758 | 1.0708731  | 1.4180157  |
| O  | 5.7981758  | -1.0708731 | 1.4180157  |
| O  | 5.7981758  | 1.0708731  | 1.4180157  |
| S  | 1.5502633  | 1.6821289  | 1.6864757  |
| S  | 1.5502633  | -1.6821289 | 1.6864757  |
| S  | -1.5502633 | -1.6821289 | 1.6864757  |
| S  | -1.5502633 | 1.6821289  | 1.6864757  |
| Pd | 0.0000000  | 0.0000000  | 1.6470831  |
| N  | 0.0000000  | 0.0000000  | -1.3720896 |
| C  | 0.0000000  | 1.1375364  | -2.0563698 |
| C  | 0.0000000  | -1.1375364 | -2.0563698 |
| C  | 0.0000000  | 1.1923468  | -3.4420052 |
| H  | -0.0000000 | 2.0506671  | -1.4659705 |
| C  | 0.0000000  | -1.1923468 | -3.4420052 |
| H  | -0.0000000 | -2.0506671 | -1.4659705 |
| C  | 0.0000000  | 0.0000000  | -4.1482589 |

|   |            |            |            |
|---|------------|------------|------------|
| H | -0.0000000 | 2.1482050  | -3.9517004 |
| H | -0.0000000 | -2.1482050 | -3.9517004 |
| H | 0.0000000  | 0.0000000  | -5.2322211 |

**12A:py**

|    |            |            |            |
|----|------------|------------|------------|
| C  | 2.5948630  | -1.2206631 | 1.6113400  |
| H  | 3.2229406  | -2.1223245 | 1.6040079  |
| C  | 3.2657141  | 0.0000000  | 1.5634920  |
| C  | 2.5948630  | 1.2206631  | 1.6113400  |
| H  | 3.2229406  | 2.1223245  | 1.6040079  |
| O  | 1.3559313  | -1.4499809 | 1.6671744  |
| O  | 1.3559313  | 1.4499809  | 1.6671744  |
| C  | -2.5948630 | 1.2206631  | 1.6113400  |
| H  | -3.2229406 | 2.1223245  | 1.6040079  |
| C  | -3.2657141 | 0.0000000  | 1.5634920  |
| C  | -2.5948630 | -1.2206631 | 1.6113400  |
| H  | -3.2229406 | -2.1223245 | 1.6040079  |
| O  | -1.3559313 | 1.4499809  | 1.6671744  |
| O  | -1.3559313 | -1.4499809 | 1.6671744  |
| N  | -4.6957216 | 0.0000000  | 1.5781665  |
| N  | 4.6957216  | -0.0000000 | 1.5781665  |
| H  | -5.0648139 | 0.8121407  | 1.1022582  |
| H  | -5.0648139 | -0.8121407 | 1.1022582  |
| H  | 5.0648139  | 0.8121407  | 1.1022582  |
| H  | 5.0648139  | -0.8121407 | 1.1022582  |
| Pd | 0.0000000  | 0.0000000  | 1.6697803  |
| N  | 0.0000000  | 0.0000000  | -1.3111622 |
| C  | 0.0000000  | -1.1382843 | -1.9934762 |
| C  | 0.0000000  | 1.1382843  | -1.9934762 |
| C  | 0.0000000  | -1.1926122 | -3.3801290 |
| H  | 0.0000000  | -2.0474678 | -1.3978724 |
| C  | 0.0000000  | 1.1926122  | -3.3801290 |
| H  | 0.0000000  | 2.0474678  | -1.3978724 |
| C  | -0.0000000 | 0.0000000  | -4.0862856 |
| H  | 0.0000000  | -2.1483531 | -3.8906487 |

|   |            |           |            |
|---|------------|-----------|------------|
| H | -0.0000000 | 2.1483531 | -3.8906487 |
| H | 0.0000000  | 0.0000000 | -5.1705191 |

**12B:py**

|    |            |            |            |
|----|------------|------------|------------|
| C  | -3.1165025 | 1.2326874  | 1.6393361  |
| H  | -3.7846644 | 2.0943804  | 1.6337927  |
| C  | -3.7531961 | 0.0000000  | 1.5688272  |
| C  | -3.1165025 | -1.2326874 | 1.6393361  |
| H  | -3.7846644 | -2.0943804 | 1.6337927  |
| C  | 3.1165025  | -1.2326874 | 1.6393361  |
| H  | 3.7846644  | -2.0943804 | 1.6337927  |
| C  | 3.7531961  | 0.0000000  | 1.5688272  |
| C  | 3.1165025  | 1.2326874  | 1.6393361  |
| H  | 3.7846644  | 2.0943804  | 1.6337927  |
| N  | 5.1691760  | 0.0000000  | 1.5242571  |
| N  | -5.1691760 | -0.0000000 | 1.5242571  |
| H  | 5.5456593  | -0.8217038 | 1.0753348  |
| H  | 5.5456593  | 0.8217038  | 1.0753348  |
| H  | -5.5456593 | -0.8217038 | 1.0753348  |
| H  | -5.5456593 | 0.8217038  | 1.0753348  |
| S  | -1.5274388 | -1.7063606 | 1.7523735  |
| S  | -1.5274388 | 1.7063606  | 1.7523735  |
| S  | 1.5274388  | -1.7063606 | 1.7523735  |
| S  | 1.5274388  | 1.7063606  | 1.7523735  |
| Pd | 0.0000000  | 0.0000000  | 1.7377587  |
| N  | 0.0000000  | 0.0000000  | -1.3505323 |
| C  | 0.0000000  | 1.1373642  | -2.0327682 |
| C  | 0.0000000  | -1.1373642 | -2.0327682 |
| C  | -0.0000000 | 1.1924564  | -3.4195211 |
| H  | 0.0000000  | 2.0478145  | -1.4384043 |
| C  | -0.0000000 | -1.1924564 | -3.4195211 |
| H  | 0.0000000  | -2.0478145 | -1.4384043 |
| C  | -0.0000000 | 0.0000000  | -4.1260470 |
| H  | -0.0000000 | 2.1485569  | -3.9294598 |
| H  | -0.0000000 | -2.1485569 | -3.9294598 |

|   |            |           |            |
|---|------------|-----------|------------|
| H | -0.0000000 | 0.0000000 | -5.2103891 |
|---|------------|-----------|------------|

**13A:py**

|   |            |            |           |
|---|------------|------------|-----------|
| C | 2.6096527  | -1.2172639 | 1.0477602 |
| H | 3.2020150  | -2.1345564 | 1.0411414 |
| C | 3.3021015  | -0.0000000 | 0.9726219 |
| C | 2.6096527  | 1.2172639  | 1.0477602 |
| H | 3.2020150  | 2.1345564  | 1.0411414 |
| O | 1.3675771  | -1.4283777 | 1.1262530 |
| O | 1.3675771  | 1.4283777  | 1.1262530 |
| C | -2.6096527 | 1.2172639  | 1.0477602 |
| H | -3.2020150 | 2.1345564  | 1.0411414 |
| C | -3.3021015 | 0.0000000  | 0.9726219 |
| C | -2.6096527 | -1.2172639 | 1.0477602 |
| H | -3.2020150 | -2.1345564 | 1.0411414 |
| O | -1.3675771 | 1.4283777  | 1.1262530 |
| O | -1.3675771 | -1.4283777 | 1.1262530 |
| N | -4.7198733 | 0.0000000  | 0.8066760 |
| N | 4.7198733  | 0.0000000  | 0.8066760 |
| C | -5.4029898 | -1.2053099 | 1.2085307 |
| H | -5.1899830 | -1.5070443 | 2.2487304 |
| H | -6.4771914 | -1.0475344 | 1.1130262 |
| H | -5.1485945 | -2.0426450 | 0.5539030 |
| C | -5.4029898 | 1.2053099  | 1.2085307 |
| H | -5.1485945 | 2.0426450  | 0.5539030 |
| H | -6.4771914 | 1.0475344  | 1.1130262 |
| H | -5.1899830 | 1.5070443  | 2.2487304 |
| C | 5.4029898  | 1.2053099  | 1.2085307 |
| H | 5.1899830  | 1.5070443  | 2.2487304 |
| H | 6.4771914  | 1.0475344  | 1.1130262 |
| H | 5.1485945  | 2.0426450  | 0.5539030 |
| C | 5.4029898  | -1.2053099 | 1.2085307 |
| H | 5.1485945  | -2.0426450 | 0.5539030 |
| H | 6.4771914  | -1.0475344 | 1.1130262 |
| H | 5.1899830  | -1.5070443 | 2.2487304 |

|    |            |            |            |
|----|------------|------------|------------|
| Pd | 0.0000000  | 0.0000000  | 1.1241412  |
| N  | 0.0000000  | 0.0000000  | -1.8697567 |
| C  | 0.0000000  | -1.1380014 | -2.5523100 |
| C  | 0.0000000  | 1.1380014  | -2.5523100 |
| C  | -0.0000000 | -1.1924491 | -3.9389235 |
| H  | 0.0000000  | -2.0474335 | -1.9571158 |
| C  | -0.0000000 | 1.1924491  | -3.9389235 |
| H  | 0.0000000  | 2.0474335  | -1.9571158 |
| C  | 0.0000000  | 0.0000000  | -4.6451494 |
| H  | 0.0000000  | -2.1481098 | -4.4495372 |
| H  | -0.0000000 | 2.1481098  | -4.4495372 |
| H  | -0.0000000 | 0.0000000  | -5.7294377 |

# **13B:py**

|   |            |            |            |
|---|------------|------------|------------|
| C | 3.1368931  | -1.2264526 | -1.0833065 |
| H | 3.7653975  | -2.1096826 | -1.0997510 |
| C | 3.8042806  | 0.0000000  | -1.0492420 |
| C | 3.1368931  | 1.2264526  | -1.0833065 |
| H | 3.7653975  | 2.1096826  | -1.0997510 |
| C | -3.1368931 | 1.2264526  | -1.0833065 |
| H | -3.7653975 | 2.1096826  | -1.0997510 |
| C | -3.8042806 | 0.0000000  | -1.0492420 |
| C | -3.1368931 | -1.2264526 | -1.0833065 |
| H | -3.7653975 | -2.1096826 | -1.0997510 |
| N | -5.2145432 | 0.0000000  | -0.9752744 |
| N | 5.2145432  | 0.0000000  | -0.9752744 |
| C | -5.9073697 | 1.2174210  | -1.3165219 |
| H | -5.6644918 | 1.5918669  | -2.3240227 |
| H | -6.9801399 | 1.0343624  | -1.2739308 |
| H | -5.6953552 | 2.0131752  | -0.5971350 |
| C | -5.9073697 | -1.2174210 | -1.3165219 |
| H | -5.6953552 | -2.0131752 | -0.5971350 |
| H | -6.9801399 | -1.0343624 | -1.2739308 |
| H | -5.6644918 | -1.5918669 | -2.3240227 |
| C | 5.9073697  | -1.2174210 | -1.3165219 |

|    |            |            |            |
|----|------------|------------|------------|
| H  | 5.6644918  | -1.5918669 | -2.3240227 |
| H  | 6.9801399  | -1.0343624 | -1.2739308 |
| H  | 5.6953552  | -2.0131752 | -0.5971350 |
| C  | 5.9073697  | 1.2174210  | -1.3165219 |
| H  | 5.6953552  | 2.0131752  | -0.5971350 |
| H  | 6.9801399  | 1.0343624  | -1.2739308 |
| H  | 5.6644918  | 1.5918669  | -2.3240227 |
| S  | -1.5382254 | -1.6860702 | -1.1038100 |
| S  | -1.5382254 | 1.6860702  | -1.1038100 |
| S  | 1.5382254  | -1.6860702 | -1.1038100 |
| S  | 1.5382254  | 1.6860702  | -1.1038100 |
| Pd | 0.0000000  | 0.0000000  | -1.0756415 |
| N  | 0.0000000  | 0.0000000  | 2.0758228  |
| C  | 0.0000000  | -1.1369671 | 2.7590446  |
| C  | 0.0000000  | 1.1369671  | 2.7590446  |
| C  | 0.0000000  | -1.1921953 | 4.1459023  |
| H  | 0.0000000  | -2.0479012 | 2.1656097  |
| C  | 0.0000000  | 1.1921953  | 4.1459023  |
| H  | -0.0000000 | 2.0479012  | 2.1656097  |
| C  | 0.0000000  | 0.0000000  | 4.8525957  |
| H  | 0.0000000  | -2.1482224 | 4.6560411  |
| H  | 0.0000000  | 2.1482224  | 4.6560411  |
| H  | -0.0000000 | 0.0000000  | 5.9369719  |

#### 14A:py

|   |            |            |            |
|---|------------|------------|------------|
| C | 2.5995009  | -1.2136807 | -1.0581415 |
| H | 3.2001435  | -2.1279092 | -1.0418291 |
| C | 3.2864879  | 0.0000000  | -0.9589661 |
| C | 2.5995009  | 1.2136807  | -1.0581415 |
| H | 3.2001435  | 2.1279092  | -1.0418291 |
| O | 1.3653317  | -1.4367762 | -1.1744891 |
| O | 1.3653317  | 1.4367762  | -1.1744891 |
| C | -2.5995009 | 1.2136807  | -1.0581415 |
| H | -3.2001435 | 2.1279092  | -1.0418291 |
| C | -3.2864879 | 0.0000000  | -0.9589661 |



|    |            |            |            |
|----|------------|------------|------------|
| C  | -2.5995009 | -1.2136807 | -1.0581415 |
| H  | -3.2001435 | -2.1279092 | -1.0418291 |
| O  | -1.3653317 | 1.4367762  | -1.1744891 |
| O  | -1.3653317 | -1.4367762 | -1.1744891 |
| C  | -4.8177294 | 0.0000000  | -0.8540236 |
| C  | 4.8177294  | 0.0000000  | -0.8540236 |
| C  | -5.3262533 | 1.2298722  | -0.0940369 |
| H  | -5.1599752 | 2.1609537  | -0.6391714 |
| H  | -6.4046379 | 1.1442140  | 0.0603901  |
| H  | -4.8481801 | 1.3155171  | 0.8850617  |
| C  | -5.3262533 | -1.2298722 | -0.0940369 |
| H  | -6.4046379 | -1.1442140 | 0.0603901  |
| H  | -5.1599752 | -2.1609537 | -0.6391714 |
| H  | -4.8481801 | -1.3155171 | 0.8850617  |
| C  | -5.4295710 | 0.0000000  | -2.2591028 |
| H  | -6.5228387 | 0.0000000  | -2.2119834 |
| H  | -5.1126313 | 0.8824166  | -2.8209740 |
| H  | -5.1126313 | -0.8824166 | -2.8209740 |
| C  | 5.4295710  | 0.0000000  | -2.2591028 |
| H  | 5.1126313  | 0.8824166  | -2.8209740 |
| H  | 6.5228387  | 0.0000000  | -2.2119834 |
| H  | 5.1126313  | -0.8824166 | -2.8209740 |
| C  | 5.3262533  | 1.2298722  | -0.0940369 |
| H  | 6.4046379  | 1.1442140  | 0.0603901  |
| H  | 5.1599752  | 2.1609537  | -0.6391714 |
| H  | 4.8481801  | 1.3155171  | 0.8850617  |
| C  | 5.3262533  | -1.2298722 | -0.0940369 |
| H  | 4.8481801  | -1.3155171 | 0.8850617  |
| H  | 5.1599752  | -2.1609537 | -0.6391714 |
| H  | 6.4046379  | -1.1442140 | 0.0603901  |
| Pd | 0.0000000  | 0.0000000  | -1.1788520 |
| N  | 0.0000000  | 0.0000000  | 1.8009568  |
| C  | -0.0000000 | -1.1382204 | 2.4832094  |
| C  | -0.0000000 | 1.1382204  | 2.4832094  |
| C  | 0.0000000  | -1.1926233 | 3.8698547  |

|   |            |            |           |
|---|------------|------------|-----------|
| H | 0.0000000  | -2.0475657 | 1.8878656 |
| C | 0.0000000  | 1.1926233  | 3.8698547 |
| H | 0.0000000  | 2.0475657  | 1.8878656 |
| C | 0.0000000  | 0.0000000  | 4.5759944 |
| H | -0.0000000 | -2.1483883 | 4.3803596 |
| H | -0.0000000 | 2.1483883  | 4.3803596 |
| H | 0.0000000  | 0.0000000  | 5.6602351 |

**14B:py**

|   |            |            |            |
|---|------------|------------|------------|
| C | 3.1306041  | -1.2231565 | -0.8806337 |
| H | 3.7673433  | -2.1024523 | -0.9068028 |
| C | 3.7912657  | -0.0000597 | -0.9092492 |
| C | 3.1306091  | 1.2229574  | -0.8807266 |
| H | 3.7675507  | 2.1020734  | -0.9071198 |
| C | -3.1305563 | 1.2229821  | -0.8807522 |
| H | -3.7675013 | 2.1020663  | -0.9071666 |
| C | -3.7912389 | -0.0000866 | -0.9092747 |
| C | -3.1305498 | -1.2231617 | -0.8806585 |
| H | -3.7673024 | -2.1024550 | -0.9068238 |
| C | -5.3249660 | 0.0000549  | -1.0746624 |
| C | 5.3250187  | 0.0000554  | -1.0746373 |
| C | -5.9697554 | 1.2306364  | -0.4297729 |
| H | -5.7161944 | 2.1592687  | -0.9447717 |
| H | -7.0571119 | 1.1364784  | -0.4757813 |
| H | -5.6814882 | 1.3288922  | 0.6196834  |
| C | -5.9697479 | -1.2305621 | -0.4299107 |
| H | -7.0571118 | -1.1364838 | -0.4758800 |
| H | -5.7160552 | -2.1590735 | -0.9450361 |
| H | -5.6814175 | -1.3288789 | 0.6195306  |
| C | -5.6442821 | 0.0000536  | -2.5738727 |
| H | -6.7254572 | 0.0000646  | -2.7413898 |
| H | -5.2226995 | 0.8826144  | -3.0611780 |
| H | -5.2227038 | -0.8825258 | -3.0611088 |
| C | 5.6443357  | 0.0000534  | -2.5738444 |
| H | 5.2227594  | 0.8826133  | -3.0611565 |

|    |            |            |            |
|----|------------|------------|------------|
| H  | 6.7255086  | 0.0000592  | -2.7413555 |
| H  | 5.2227573  | -0.8825254 | -3.0610838 |
| C  | 5.9697955  | 1.2306368  | -0.4297505 |
| H  | 7.0571533  | 1.1364795  | -0.4757500 |
| H  | 5.7162461  | 2.1592700  | -0.9447476 |
| H  | 5.6815304  | 1.3289003  | 0.6197038  |
| C  | 5.9697854  | -1.2305556 | -0.4298775 |
| H  | 5.6814369  | -1.3288720 | 0.6195606  |
| H  | 5.7160927  | -2.1590687 | -0.9450030 |
| H  | 7.0571443  | -1.1364855 | -0.4758313 |
| S  | -1.5377525 | 1.6932206  | -0.8192582 |
| S  | -1.5377200 | -1.6932152 | -0.8190317 |
| S  | 1.5377739  | -1.6932177 | -0.8190181 |
| S  | 1.5377895  | 1.6932198  | -0.8192065 |
| Pd | 0.0000209  | 0.0000295  | -0.7961568 |
| N  | -0.0003092 | -0.0000302 | 2.3188052  |
| C  | -0.0001851 | 1.1372209  | 3.0018610  |
| C  | -0.0001950 | -1.1372110 | 3.0018980  |
| C  | 0.0000346  | 1.1923899  | 4.3886163  |
| H  | -0.0003460 | 2.0484556  | 2.4088579  |
| C  | 0.0000287  | -1.1923221 | 4.3886784  |
| H  | -0.0003667 | -2.0484957 | 2.4089320  |
| C  | 0.0001006  | 0.0000265  | 5.0951502  |
| H  | 0.0001071  | 2.1484526  | 4.8987255  |
| H  | 0.0000980  | -2.1483872 | 4.8988085  |
| H  | 0.0001236  | 0.0000564  | 6.1794695  |

**15A:py**

|   |           |            |           |
|---|-----------|------------|-----------|
| C | 2.5787321 | -1.2332432 | 1.8687560 |
| H | 3.2058990 | -2.1303564 | 1.8493009 |
| C | 3.2218082 | -0.0000000 | 1.8425755 |
| H | 4.3027970 | 0.0000000  | 1.8045534 |
| C | 2.5787321 | 1.2332432  | 1.8687560 |
| H | 3.2058990 | 2.1303564  | 1.8493009 |
| O | 1.3401633 | -1.4701796 | 1.9141864 |

|    |            |            |            |
|----|------------|------------|------------|
| O  | 1.3401633  | 1.4701796  | 1.9141864  |
| C  | -2.5787321 | 1.2332432  | 1.8687560  |
| H  | -3.2058990 | 2.1303564  | 1.8493009  |
| C  | -3.2218082 | 0.0000000  | 1.8425755  |
| H  | -4.3027970 | 0.0000000  | 1.8045534  |
| C  | -2.5787321 | -1.2332432 | 1.8687560  |
| H  | -3.2058990 | -2.1303564 | 1.8493009  |
| O  | -1.3401633 | 1.4701796  | 1.9141864  |
| O  | -1.3401633 | -1.4701796 | 1.9141864  |
| Pt | 0.0000000  | 0.0000000  | 1.9266499  |
| N  | 0.0000000  | 0.0000000  | -1.2962157 |
| C  | -0.0000000 | -1.1371391 | -1.9801605 |
| C  | -0.0000000 | 1.1371391  | -1.9801605 |
| C  | 0.0000000  | -1.1922885 | -3.3669093 |
| H  | 0.0000000  | -2.0481981 | -1.3874165 |
| C  | 0.0000000  | 1.1922885  | -3.3669093 |
| H  | 0.0000000  | 2.0481981  | -1.3874165 |
| C  | -0.0000000 | 0.0000000  | -4.0734446 |
| H  | 0.0000000  | -2.1484564 | -3.8768114 |
| H  | 0.0000000  | 2.1484564  | -3.8768114 |
| H  | 0.0000000  | 0.0000000  | -5.1576248 |

#### 15B:py

|   |            |            |           |
|---|------------|------------|-----------|
| C | 3.0939948  | -1.2456094 | 1.8945460 |
| H | 3.7700297  | -2.0982729 | 1.8841813 |
| C | 3.6984557  | 0.0000000  | 1.8783310 |
| H | 4.7832736  | 0.0000000  | 1.8549308 |
| C | 3.0939948  | 1.2456094  | 1.8945460 |
| H | 3.7700297  | 2.0982729  | 1.8841813 |
| C | -3.0939948 | 1.2456094  | 1.8945460 |
| H | -3.7700297 | 2.0982729  | 1.8841813 |
| C | -3.6984557 | 0.0000000  | 1.8783310 |
| H | -4.7832736 | 0.0000000  | 1.8549308 |
| C | -3.0939948 | -1.2456094 | 1.8945460 |
| H | -3.7700297 | -2.0982729 | 1.8841813 |

|    |            |            |            |
|----|------------|------------|------------|
| Pt | 0.0000000  | 0.0000000  | 1.9353188  |
| S  | 1.5066634  | 1.7284602  | 1.9308765  |
| S  | 1.5066634  | -1.7284602 | 1.9308765  |
| S  | -1.5066634 | 1.7284602  | 1.9308765  |
| S  | -1.5066634 | -1.7284602 | 1.9308765  |
| N  | 0.0000000  | 0.0000000  | -1.3409039 |
| C  | -0.0000000 | 1.1367656  | -2.0245843 |
| C  | -0.0000000 | -1.1367656 | -2.0245843 |
| C  | 0.0000000  | 1.1921884  | -3.4113201 |
| H  | -0.0000000 | 2.0487267  | -1.4325746 |
| C  | 0.0000000  | -1.1921884 | -3.4113201 |
| H  | -0.0000000 | -2.0487267 | -1.4325746 |
| C  | 0.0000000  | 0.0000000  | -4.1180492 |
| H  | 0.0000000  | 2.1484471  | -3.9209980 |
| H  | 0.0000000  | -2.1484471 | -3.9209980 |
| H  | 0.0000000  | 0.0000000  | -5.2023507 |

**16A:py**

|    |            |            |           |
|----|------------|------------|-----------|
| C  | 2.5769300  | -1.2410231 | 1.8565296 |
| H  | 3.2313352  | -2.1172406 | 1.8386451 |
| C  | 3.1961528  | 0.0000000  | 1.8321254 |
| C  | 2.5769300  | 1.2410231  | 1.8565296 |
| H  | 3.2313352  | 2.1172406  | 1.8386451 |
| O  | 1.3363408  | -1.4728218 | 1.8988574 |
| O  | 1.3363408  | 1.4728218  | 1.8988574 |
| C  | -2.5769300 | 1.2410231  | 1.8565296 |
| H  | -3.2313352 | 2.1172406  | 1.8386451 |
| C  | -3.1961528 | -0.0000000 | 1.8321254 |
| C  | -2.5769300 | -1.2410231 | 1.8565296 |
| H  | -3.2313352 | -2.1172406 | 1.8386451 |
| O  | -1.3363408 | 1.4728218  | 1.8988574 |
| O  | -1.3363408 | -1.4728218 | 1.8988574 |
| F  | 4.5494330  | 0.0000000  | 1.7856929 |
| F  | -4.5494330 | -0.0000000 | 1.7856929 |
| Pt | 0.0000000  | 0.0000000  | 1.9103573 |

|   |            |            |            |
|---|------------|------------|------------|
| N | 0.0000000  | 0.0000000  | -1.2754248 |
| C | -0.0000000 | -1.1374561 | -1.9595268 |
| C | -0.0000000 | 1.1374561  | -1.9595268 |
| C | 0.0000000  | -1.1922815 | -3.3460643 |
| H | 0.0000000  | -2.0487779 | -1.3671019 |
| C | 0.0000000  | 1.1922815  | -3.3460643 |
| H | 0.0000000  | 2.0487779  | -1.3671019 |
| C | 0.0000000  | 0.0000000  | -4.0525667 |
| H | 0.0000000  | -2.1482846 | -3.8559998 |
| H | 0.0000000  | 2.1482846  | -3.8559998 |
| H | 0.0000000  | 0.0000000  | -5.1367455 |

# **16B:py**

|    |            |            |            |
|----|------------|------------|------------|
| C  | 3.0872773  | -1.2504482 | 1.8817215  |
| H  | 3.7938107  | -2.0772490 | 1.8695075  |
| C  | 3.6656567  | 0.0000000  | 1.8602183  |
| C  | 3.0872773  | 1.2504482  | 1.8817215  |
| H  | 3.7938107  | 2.0772490  | 1.8695075  |
| C  | -3.0872773 | 1.2504482  | 1.8817215  |
| H  | -3.7938107 | 2.0772490  | 1.8695075  |
| C  | -3.6656567 | 0.0000000  | 1.8602183  |
| C  | -3.0872773 | -1.2504482 | 1.8817215  |
| H  | -3.7938107 | -2.0772490 | 1.8695075  |
| F  | 5.0210394  | -0.0000000 | 1.8208537  |
| F  | -5.0210394 | 0.0000000  | 1.8208537  |
| Pt | 0.0000000  | 0.0000000  | 1.9311953  |
| S  | 1.5004400  | 1.7324931  | 1.9275011  |
| S  | 1.5004400  | -1.7324931 | 1.9275011  |
| S  | -1.5004400 | 1.7324931  | 1.9275011  |
| S  | -1.5004400 | -1.7324931 | 1.9275011  |
| N  | 0.0000000  | 0.0000000  | -1.3197047 |
| C  | 0.0000000  | -1.1369403 | -2.0035460 |
| C  | 0.0000000  | 1.1369403  | -2.0035460 |
| C  | 0.0000000  | -1.1922539 | -3.3900694 |
| H  | -0.0000000 | -2.0492052 | -1.4120060 |

|   |            |            |            |
|---|------------|------------|------------|
| C | 0.0000000  | 1.1922539  | -3.3900694 |
| H | -0.0000000 | 2.0492052  | -1.4120060 |
| C | 0.0000000  | 0.0000000  | -4.0966097 |
| H | 0.0000000  | -2.1483002 | -3.8999588 |
| H | 0.0000000  | 2.1483002  | -3.8999588 |
| H | 0.0000000  | 0.0000000  | -5.1807845 |

# **17A:py**

|    |            |            |            |
|----|------------|------------|------------|
| C  | -2.5802706 | 1.2445498  | 1.7190321  |
| H  | -3.2095963 | 2.1387229  | 1.7002073  |
| C  | -3.2331702 | 0.0000000  | 1.6865065  |
| C  | -2.5802706 | -1.2445498 | 1.7190321  |
| H  | -3.2095963 | -2.1387229 | 1.7002073  |
| O  | -1.3467342 | 1.4609519  | 1.7703962  |
| O  | -1.3467342 | -1.4609519 | 1.7703962  |
| C  | 2.5802706  | -1.2445498 | 1.7190321  |
| H  | 3.2095963  | -2.1387229 | 1.7002073  |
| C  | 3.2331702  | 0.0000000  | 1.6865065  |
| C  | 2.5802706  | 1.2445498  | 1.7190321  |
| H  | 3.2095963  | 2.1387229  | 1.7002073  |
| O  | 1.3467342  | -1.4609519 | 1.7703962  |
| O  | 1.3467342  | 1.4609519  | 1.7703962  |
| Pt | 0.0000000  | 0.0000000  | 1.7809855  |
| C  | 4.6541137  | -0.0000000 | 1.6265202  |
| C  | -4.6541137 | 0.0000000  | 1.6265202  |
| N  | 5.8057860  | 0.0000000  | 1.5781557  |
| N  | -5.8057860 | -0.0000000 | 1.5781557  |
| N  | 0.0000000  | 0.0000000  | -1.3474751 |
| C  | -0.0000000 | 1.1377601  | -2.0323312 |
| C  | 0.0000000  | -1.1377601 | -2.0323312 |
| C  | 0.0000000  | 1.1922504  | -3.4183777 |
| H  | 0.0000000  | 2.0502242  | -1.4417533 |
| C  | 0.0000000  | -1.1922504 | -3.4183777 |
| H  | 0.0000000  | -2.0502242 | -1.4417533 |
| C  | 0.0000000  | 0.0000000  | -4.1248089 |

|   |            |            |            |
|---|------------|------------|------------|
| H | 0.0000000  | 2.1482842  | -3.9279255 |
| H | 0.0000000  | -2.1482842 | -3.9279255 |
| H | -0.0000000 | 0.0000000  | -5.2088336 |

**17B:py**

|    |            |            |            |
|----|------------|------------|------------|
| C  | 3.0883639  | -1.2538399 | 1.7407821  |
| H  | 3.7672391  | -2.1036887 | 1.7273165  |
| C  | 3.7028667  | 0.0000000  | 1.7121430  |
| C  | 3.0883639  | 1.2538399  | 1.7407821  |
| H  | 3.7672391  | 2.1036887  | 1.7273165  |
| C  | -3.0883639 | 1.2538399  | 1.7407821  |
| H  | -3.7672391 | 2.1036887  | 1.7273165  |
| C  | -3.7028667 | 0.0000000  | 1.7121430  |
| C  | -3.0883639 | -1.2538399 | 1.7407821  |
| H  | -3.7672391 | -2.1036887 | 1.7273165  |
| Pt | 0.0000000  | 0.0000000  | 1.7985159  |
| S  | 1.5075279  | 1.7235492  | 1.7978542  |
| S  | 1.5075279  | -1.7235492 | 1.7978542  |
| S  | -1.5075279 | -1.7235492 | 1.7978542  |
| S  | -1.5075279 | 1.7235492  | 1.7978542  |
| C  | -5.1315833 | -0.0000000 | 1.6597145  |
| C  | 5.1315833  | 0.0000000  | 1.6597145  |
| N  | -6.2832454 | 0.0000000  | 1.6173137  |
| N  | 6.2832454  | 0.0000000  | 1.6173137  |
| N  | 0.0000000  | 0.0000000  | -1.3947742 |
| C  | 0.0000000  | -1.1371468 | -2.0792203 |
| C  | 0.0000000  | 1.1371468  | -2.0792203 |
| C  | 0.0000000  | -1.1922290 | -3.4653459 |
| H  | 0.0000000  | -2.0505107 | -1.4894212 |
| C  | 0.0000000  | 1.1922290  | -3.4653459 |
| H  | 0.0000000  | 2.0505107  | -1.4894212 |
| C  | 0.0000000  | 0.0000000  | -4.1718234 |
| H  | 0.0000000  | -2.1481569 | -3.9751301 |
| H  | 0.0000000  | 2.1481569  | -3.9751301 |
| H  | 0.0000000  | 0.0000000  | -5.2558368 |



**18A:py**

|    |            |            |            |
|----|------------|------------|------------|
| C  | 2.5845552  | -1.2481860 | 1.6148645  |
| H  | 3.2240537  | -2.1317114 | 1.6135729  |
| C  | 3.2216213  | 0.0000000  | 1.6193279  |
| C  | 2.5845552  | 1.2481860  | 1.6148645  |
| H  | 3.2240537  | 2.1317114  | 1.6135729  |
| O  | 1.3485795  | -1.4577704 | 1.6124271  |
| O  | 1.3485795  | 1.4577704  | 1.6124271  |
| C  | -2.5845552 | 1.2481860  | 1.6148645  |
| H  | -3.2240537 | 2.1317114  | 1.6135729  |
| C  | -3.2216213 | 0.0000000  | 1.6193279  |
| C  | -2.5845552 | -1.2481860 | 1.6148645  |
| H  | -3.2240537 | -2.1317114 | 1.6135729  |
| O  | -1.3485795 | 1.4577704  | 1.6124271  |
| O  | -1.3485795 | -1.4577704 | 1.6124271  |
| N  | -4.6706288 | 0.0000000  | 1.6307112  |
| N  | 4.6706288  | 0.0000000  | 1.6307112  |
| O  | -5.2380691 | -1.0744246 | 1.6366284  |
| O  | -5.2380691 | 1.0744246  | 1.6366284  |
| O  | 5.2380691  | -1.0744246 | 1.6366284  |
| O  | 5.2380691  | 1.0744246  | 1.6366284  |
| Pt | 0.0000000  | 0.0000000  | 1.6149313  |
| N  | 0.0000000  | 0.0000000  | -1.5026878 |
| C  | 0.0000000  | 1.1382510  | -2.1870228 |
| C  | 0.0000000  | -1.1382510 | -2.1870228 |
| C  | 0.0000000  | 1.1925673  | -3.5731576 |
| H  | -0.0000000 | 2.0502915  | -1.5957870 |
| C  | 0.0000000  | -1.1925673 | -3.5731576 |
| H  | -0.0000000 | -2.0502915 | -1.5957870 |
| C  | 0.0000000  | 0.0000000  | -4.2790415 |
| H  | 0.0000000  | 2.1478978  | -4.0841641 |
| H  | 0.0000000  | -2.1478978 | -4.0841641 |
| H  | 0.0000000  | 0.0000000  | -5.3629891 |

**18B:py**

|    |            |            |            |
|----|------------|------------|------------|
| C  | 3.0803077  | -1.2613526 | 1.6572716  |
| H  | 3.7914375  | -2.0958361 | 1.6570552  |
| C  | 3.6975775  | 0.0000000  | 1.5879670  |
| C  | 3.0803077  | 1.2613526  | 1.6572716  |
| H  | 3.7914375  | 2.0958361  | 1.6570552  |
| C  | -3.0803077 | 1.2613526  | 1.6572716  |
| H  | -3.7914375 | 2.0958361  | 1.6570552  |
| C  | -3.6975775 | 0.0000000  | 1.5879670  |
| C  | -3.0803077 | -1.2613526 | 1.6572716  |
| H  | -3.7914375 | -2.0958361 | 1.6570552  |
| N  | -5.0370988 | 0.0000000  | 1.4680251  |
| N  | 5.0370988  | 0.0000000  | 1.4680251  |
| O  | -5.7650429 | -1.0569604 | 1.4106662  |
| O  | -5.7650429 | 1.0569604  | 1.4106662  |
| O  | 5.7650429  | -1.0569604 | 1.4106662  |
| O  | 5.7650429  | 1.0569604  | 1.4106662  |
| Pt | 0.0000000  | 0.0000000  | 1.7935393  |
| S  | 1.5095929  | 1.7028466  | 1.7382761  |
| S  | 1.5095929  | -1.7028466 | 1.7382761  |
| S  | -1.5095929 | -1.7028466 | 1.7382761  |
| S  | -1.5095929 | 1.7028466  | 1.7382761  |
| N  | 0.0000000  | 0.0000000  | -1.4774380 |
| C  | -0.0000000 | 1.1367913  | -2.1627629 |
| C  | -0.0000000 | -1.1367913 | -2.1627629 |
| C  | -0.0000000 | 1.1921449  | -3.5487376 |
| H  | 0.0000000  | 2.0507083  | -1.5735067 |
| C  | -0.0000000 | -1.1921449 | -3.5487376 |
| H  | 0.0000000  | -2.0507083 | -1.5735067 |
| C  | 0.0000000  | 0.0000000  | -4.2552709 |
| H  | 0.0000000  | 2.1481510  | -4.0583039 |
| H  | 0.0000000  | -2.1481510 | -4.0583039 |
| H  | -0.0000000 | 0.0000000  | -5.3392690 |

**19A:py**

|   |           |            |           |
|---|-----------|------------|-----------|
| C | 2.5898623 | -1.2231084 | 1.7009932 |
|---|-----------|------------|-----------|

|    |            |            |            |
|----|------------|------------|------------|
| H  | 3.2125368  | -2.1256912 | 1.6892050  |
| C  | 3.2551009  | 0.0000000  | 1.6563776  |
| C  | 2.5898623  | 1.2231084  | 1.7009932  |
| H  | 3.2125368  | 2.1256912  | 1.6892050  |
| O  | 1.3467481  | -1.4558018 | 1.7576883  |
| O  | 1.3467481  | 1.4558018  | 1.7576883  |
| C  | -2.5898623 | 1.2231084  | 1.7009932  |
| H  | -3.2125368 | 2.1256912  | 1.6892050  |
| C  | -3.2551009 | 0.0000000  | 1.6563776  |
| C  | -2.5898623 | -1.2231084 | 1.7009932  |
| H  | -3.2125368 | -2.1256912 | 1.6892050  |
| O  | -1.3467481 | 1.4558018  | 1.7576883  |
| O  | -1.3467481 | -1.4558018 | 1.7576883  |
| N  | -4.6843522 | 0.0000000  | 1.6673205  |
| N  | 4.6843522  | 0.0000000  | 1.6673205  |
| H  | -5.0535722 | 0.8124865  | 1.1923221  |
| H  | -5.0535722 | -0.8124865 | 1.1923221  |
| H  | 5.0535722  | 0.8124865  | 1.1923221  |
| H  | 5.0535722  | -0.8124865 | 1.1923221  |
| Pt | 0.0000000  | 0.0000000  | 1.7701893  |
| N  | 0.0000000  | 0.0000000  | -1.4805754 |
| C  | 0.0000000  | -1.1371228 | -2.1644736 |
| C  | 0.0000000  | 1.1371228  | -2.1644736 |
| C  | 0.0000000  | -1.1922672 | -3.5514366 |
| H  | -0.0000000 | -2.0478483 | -1.5710276 |
| C  | 0.0000000  | 1.1922672  | -3.5514366 |
| H  | -0.0000000 | 2.0478483  | -1.5710276 |
| C  | 0.0000000  | 0.0000000  | -4.2581115 |
| H  | -0.0000000 | -2.1482160 | -4.0617374 |
| H  | -0.0000000 | 2.1482160  | -4.0617374 |
| H  | -0.0000000 | 0.0000000  | -5.3423825 |

**19B:py**

|   |           |            |           |
|---|-----------|------------|-----------|
| C | 3.1024598 | -1.2341016 | 1.7135543 |
| H | 3.7675010 | -2.0974767 | 1.7114779 |

|    |            |            |            |
|----|------------|------------|------------|
| C  | 3.7383396  | 0.0000000  | 1.6725062  |
| C  | 3.1024598  | 1.2341016  | 1.7135543  |
| H  | 3.7675010  | 2.0974767  | 1.7114779  |
| C  | -3.1024598 | 1.2341016  | 1.7135543  |
| H  | -3.7675010 | 2.0974767  | 1.7114779  |
| C  | -3.7383396 | 0.0000000  | 1.6725062  |
| C  | -3.1024598 | -1.2341016 | 1.7135543  |
| H  | -3.7675010 | -2.0974767 | 1.7114779  |
| N  | -5.1546828 | 0.0000000  | 1.6748902  |
| N  | 5.1546828  | 0.0000000  | 1.6748902  |
| H  | -5.5469107 | 0.8220006  | 1.2402375  |
| H  | -5.5469107 | -0.8220006 | 1.2402375  |
| H  | 5.5469107  | 0.8220006  | 1.2402375  |
| H  | 5.5469107  | -0.8220006 | 1.2402375  |
| Pt | 0.0000000  | 0.0000000  | 1.7829132  |
| S  | 1.5127619  | 1.7137549  | 1.7811514  |
| S  | 1.5127619  | -1.7137549 | 1.7811514  |
| S  | -1.5127619 | 1.7137549  | 1.7811514  |
| S  | -1.5127619 | -1.7137549 | 1.7811514  |
| N  | 0.0000000  | 0.0000000  | -1.5250743 |
| C  | 0.0000000  | 1.1367870  | -2.2084756 |
| C  | 0.0000000  | -1.1367870 | -2.2084756 |
| C  | 0.0000000  | 1.1922633  | -3.5954110 |
| H  | -0.0000000 | 2.0481193  | -1.6154582 |
| C  | 0.0000000  | -1.1922633 | -3.5954110 |
| H  | -0.0000000 | -2.0481193 | -1.6154582 |
| C  | 0.0000000  | 0.0000000  | -4.3020938 |
| H  | -0.0000000 | 2.1482982  | -4.1055669 |
| H  | -0.0000000 | -2.1482982 | -4.1055669 |
| H  | 0.0000000  | 0.0000000  | -5.3863988 |

## 20A:py

|   |           |            |           |
|---|-----------|------------|-----------|
| C | 2.6066615 | -1.2196075 | 1.1221292 |
| H | 3.1945214 | -2.1374598 | 1.1168304 |
| C | 3.2937829 | 0.0000000  | 1.0482543 |

|    |            |            |            |
|----|------------|------------|------------|
| C  | 2.6066615  | 1.2196075  | 1.1221292  |
| H  | 3.1945214  | 2.1374598  | 1.1168304  |
| O  | 1.3602399  | -1.4349126 | 1.1972194  |
| O  | 1.3602399  | 1.4349126  | 1.1972194  |
| C  | -2.6066615 | 1.2196075  | 1.1221292  |
| H  | -3.1945214 | 2.1374598  | 1.1168304  |
| C  | -3.2937829 | 0.0000000  | 1.0482543  |
| C  | -2.6066615 | -1.2196075 | 1.1221292  |
| H  | -3.1945214 | -2.1374598 | 1.1168304  |
| O  | -1.3602399 | 1.4349126  | 1.1972194  |
| O  | -1.3602399 | -1.4349126 | 1.1972194  |
| N  | -4.7098066 | 0.0000000  | 0.8760091  |
| N  | 4.7098066  | -0.0000000 | 0.8760091  |
| C  | -5.3984762 | -1.2062904 | 1.2646149  |
| H  | -5.2023597 | -1.5106895 | 2.3072528  |
| H  | -6.4709825 | -1.0483140 | 1.1521383  |
| H  | -5.1341706 | -2.0417074 | 0.6114540  |
| C  | -5.3984762 | 1.2062904  | 1.2646149  |
| H  | -5.1341706 | 2.0417074  | 0.6114540  |
| H  | -6.4709825 | 1.0483140  | 1.1521383  |
| H  | -5.2023597 | 1.5106895  | 2.3072528  |
| C  | 5.3984762  | 1.2062904  | 1.2646149  |
| H  | 5.2023597  | 1.5106895  | 2.3072528  |
| H  | 6.4709825  | 1.0483140  | 1.1521383  |
| H  | 5.1341706  | 2.0417074  | 0.6114540  |
| C  | 5.3984762  | -1.2062904 | 1.2646149  |
| H  | 5.1341706  | -2.0417074 | 0.6114540  |
| H  | 6.4709825  | -1.0483140 | 1.1521383  |
| H  | 5.2023597  | -1.5106895 | 2.3072528  |
| Pt | 0.0000000  | 0.0000000  | 1.2029493  |
| N  | -0.0000000 | 0.0000000  | -2.0584701 |
| C  | -0.0000000 | -1.1368706 | -2.7425790 |
| C  | -0.0000000 | 1.1368706  | -2.7425790 |
| C  | 0.0000000  | -1.1921537 | -4.1295065 |
| H  | -0.0000000 | -2.0477685 | -2.1495103 |

|   |            |            |            |
|---|------------|------------|------------|
| C | 0.0000000  | 1.1921537  | -4.1295065 |
| H | -0.0000000 | 2.0477685  | -2.1495103 |
| C | -0.0000000 | 0.0000000  | -4.8362224 |
| H | -0.0000000 | -2.1481341 | -4.6398097 |
| H | 0.0000000  | 2.1481341  | -4.6398097 |
| H | 0.0000000  | 0.0000000  | -5.9205287 |

# **20B:py**

|   |            |            |           |
|---|------------|------------|-----------|
| C | 3.1200558  | -1.2282061 | 1.0762432 |
| H | 3.7478787  | -2.1115129 | 1.0817487 |
| C | 3.7840786  | 0.0000000  | 1.0890229 |
| C | 3.1200558  | 1.2282061  | 1.0762432 |
| H | 3.7478787  | 2.1115129  | 1.0817487 |
| C | -3.1200558 | 1.2282061  | 1.0762432 |
| H | -3.7478787 | 2.1115129  | 1.0817487 |
| C | -3.7840786 | -0.0000000 | 1.0890229 |
| C | -3.1200558 | -1.2282061 | 1.0762432 |
| H | -3.7478787 | -2.1115129 | 1.0817487 |
| N | -5.1968068 | 0.0000000  | 1.0907901 |
| N | 5.1968068  | -0.0000000 | 1.0907901 |
| C | -5.8664376 | -1.2176618 | 1.4769124 |
| H | -5.5483060 | -1.5966784 | 2.4612059 |
| H | -6.9387176 | -1.0316995 | 1.5161268 |
| H | -5.7123004 | -2.0112778 | 0.7406910 |
| C | -5.8664376 | 1.2176618  | 1.4769124 |
| H | -5.7123004 | 2.0112778  | 0.7406910 |
| H | -6.9387176 | 1.0316995  | 1.5161268 |
| H | -5.5483060 | 1.5966784  | 2.4612059 |
| C | 5.8664376  | 1.2176618  | 1.4769124 |
| H | 5.5483060  | 1.5966784  | 2.4612059 |
| H | 6.9387176  | 1.0316995  | 1.5161268 |
| H | 5.7123004  | 2.0112778  | 0.7406910 |
| C | 5.8664376  | -1.2176618 | 1.4769124 |
| H | 5.7123004  | -2.0112778 | 0.7406910 |
| H | 6.9387176  | -1.0316995 | 1.5161268 |

|    |            |            |            |
|----|------------|------------|------------|
| H  | 5.5483060  | -1.5966784 | 2.4612059  |
| Pt | 0.0000000  | 0.0000000  | 1.0404672  |
| S  | -1.5242492 | -1.6958120 | 1.0410665  |
| S  | -1.5242492 | 1.6958120  | 1.0410665  |
| S  | 1.5242492  | -1.6958120 | 1.0410665  |
| S  | 1.5242492  | 1.6958120  | 1.0410665  |
| N  | 0.0000000  | 0.0000000  | -2.3162553 |
| C  | 0.0000000  | -1.1364877 | -3.0003494 |
| C  | 0.0000000  | 1.1364877  | -3.0003494 |
| C  | 0.0000000  | -1.1921032 | -4.3874251 |
| H  | 0.0000000  | -2.0482255 | -2.4079676 |
| C  | 0.0000000  | 1.1921032  | -4.3874251 |
| H  | 0.0000000  | 2.0482255  | -2.4079676 |
| C  | 0.0000000  | 0.0000000  | -5.0943611 |
| H  | -0.0000000 | -2.1482569 | -4.8975925 |
| H  | -0.0000000 | 2.1482569  | -4.8975925 |
| H  | -0.0000000 | 0.0000000  | -6.1787860 |

# 21A:py

|   |            |            |            |
|---|------------|------------|------------|
| C | 2.6007128  | -1.2162738 | -0.9404405 |
| H | 3.1947294  | -2.1321800 | -0.9541943 |
| C | 3.2882574  | -0.0000000 | -0.9539809 |
| C | 2.6007128  | 1.2162738  | -0.9404405 |
| H | 3.1947294  | 2.1321800  | -0.9541943 |
| O | 1.3570332  | -1.4428089 | -0.9137475 |
| O | 1.3570332  | 1.4428089  | -0.9137475 |
| C | -2.6007128 | 1.2162738  | -0.9404405 |
| H | -3.1947294 | 2.1321800  | -0.9541943 |
| C | -3.2882574 | -0.0000000 | -0.9539809 |
| C | -2.6007128 | -1.2162738 | -0.9404405 |
| H | -3.1947294 | -2.1321800 | -0.9541943 |
| O | -1.3570332 | 1.4428089  | -0.9137475 |
| O | -1.3570332 | -1.4428089 | -0.9137475 |
| C | -4.8189297 | 0.0000000  | -1.0813028 |
| C | 4.8189297  | 0.0000000  | -1.0813028 |

|    |            |            |            |
|----|------------|------------|------------|
| C  | -5.4429297 | 1.2303921  | -0.4146861 |
| H  | -5.1897889 | 2.1608006  | -0.9265443 |
| H  | -6.5319862 | 1.1449851  | -0.4405068 |
| H  | -5.1332132 | 1.3169207  | 0.6297717  |
| C  | -5.4429297 | -1.2303921 | -0.4146861 |
| H  | -6.5319862 | -1.1449851 | -0.4405068 |
| H  | -5.1897889 | -2.1608006 | -0.9265443 |
| H  | -5.1332132 | -1.3169207 | 0.6297717  |
| C  | -5.1984683 | 0.0000000  | -2.5666763 |
| H  | -6.2854282 | 0.0000000  | -2.6953245 |
| H  | -4.7953315 | 0.8823729  | -3.0699197 |
| H  | -4.7953315 | -0.8823729 | -3.0699197 |
| C  | 5.1984683  | 0.0000000  | -2.5666763 |
| H  | 4.7953315  | 0.8823729  | -3.0699197 |
| H  | 6.2854282  | 0.0000000  | -2.6953245 |
| H  | 4.7953315  | -0.8823729 | -3.0699197 |
| C  | 5.4429297  | 1.2303921  | -0.4146861 |
| H  | 6.5319862  | 1.1449851  | -0.4405068 |
| H  | 5.1897889  | 2.1608006  | -0.9265443 |
| H  | 5.1332132  | 1.3169207  | 0.6297717  |
| C  | 5.4429297  | -1.2303921 | -0.4146861 |
| H  | 5.1332132  | -1.3169207 | 0.6297717  |
| H  | 5.1897889  | -2.1608006 | -0.9265443 |
| H  | 6.5319862  | -1.1449851 | -0.4405068 |
| Pt | -0.0000000 | 0.0000000  | -0.9119588 |
| N  | 0.0000000  | 0.0000000  | 2.3748625  |
| C  | 0.0000000  | -1.1367868 | 3.0596034  |
| C  | 0.0000000  | 1.1367868  | 3.0596034  |
| C  | 0.0000000  | -1.1920069 | 4.4466999  |
| H  | 0.0000000  | -2.0481788 | 2.4674204  |
| C  | 0.0000000  | 1.1920069  | 4.4466999  |
| H  | 0.0000000  | 2.0481788  | 2.4674204  |
| C  | 0.0000000  | 0.0000000  | 5.1538257  |
| H  | 0.0000000  | -2.1482749 | 4.9566104  |
| H  | 0.0000000  | 2.1482749  | 4.9566104  |



|   |           |           |           |
|---|-----------|-----------|-----------|
| H | 0.0000000 | 0.0000000 | 6.2382411 |
|---|-----------|-----------|-----------|

**21B:py**

|   |            |            |            |
|---|------------|------------|------------|
| C | -3.1148868 | 1.2244204  | -0.9550725 |
| H | -3.7504802 | 2.1041851  | -0.9689803 |
| C | -3.7726109 | 0.0000000  | -0.9627605 |
| C | -3.1148868 | -1.2244204 | -0.9550725 |
| H | -3.7504802 | -2.1041851 | -0.9689803 |
| C | 3.1148868  | -1.2244204 | -0.9550725 |
| H | 3.7504802  | -2.1041851 | -0.9689803 |
| C | 3.7726109  | 0.0000000  | -0.9627605 |
| C | 3.1148868  | 1.2244204  | -0.9550725 |
| H | 3.7504802  | 2.1041851  | -0.9689803 |
| C | 5.3110108  | 0.0000000  | -1.0801642 |
| C | -5.3110108 | 0.0000000  | -1.0801642 |
| C | 5.9347323  | -1.2305638 | -0.4149068 |
| H | 5.6968824  | -2.1593870 | -0.9370758 |
| H | 7.0229416  | -1.1371289 | -0.4272093 |
| H | 5.6140615  | -1.3276984 | 0.6252210  |
| C | 5.9347323  | 1.2305638  | -0.4149068 |
| H | 7.0229416  | 1.1371289  | -0.4272093 |
| H | 5.6968824  | 2.1593870  | -0.9370758 |
| H | 5.6140615  | 1.3276984  | 0.6252210  |
| C | 5.6779388  | 0.0000000  | -2.5681364 |
| H | 6.7639793  | 0.0000000  | -2.7009112 |
| H | 5.2723226  | -0.8826415 | -3.0685154 |
| H | 5.2723226  | 0.8826415  | -3.0685154 |
| C | -5.6779388 | 0.0000000  | -2.5681364 |
| H | -5.2723226 | -0.8826415 | -3.0685154 |
| H | -6.7639793 | 0.0000000  | -2.7009112 |
| H | -5.2723226 | 0.8826415  | -3.0685154 |
| C | -5.9347323 | -1.2305638 | -0.4149068 |
| H | -7.0229416 | -1.1371289 | -0.4272093 |
| H | -5.6968824 | -2.1593870 | -0.9370758 |
| H | -5.6140615 | -1.3276984 | 0.6252210  |

|    |            |            |            |
|----|------------|------------|------------|
| C  | -5.9347323 | 1.2305638  | -0.4149068 |
| H  | -5.6140615 | 1.3276984  | 0.6252210  |
| H  | -5.6968824 | 2.1593870  | -0.9370758 |
| H  | -7.0229416 | 1.1371289  | -0.4272093 |
| Pt | 0.0000000  | 0.0000000  | -0.9299928 |
| S  | 1.5234625  | -1.7016942 | -0.9344116 |
| S  | 1.5234625  | 1.7016942  | -0.9344116 |
| S  | -1.5234625 | 1.7016942  | -0.9344116 |
| S  | -1.5234625 | -1.7016942 | -0.9344116 |
| N  | 0.0000000  | 0.0000000  | 2.3982517  |
| C  | 0.0000000  | 1.1366163  | 3.0823573  |
| C  | 0.0000000  | -1.1366163 | 3.0823573  |
| C  | 0.0000000  | 1.1920968  | 4.4693159  |
| H  | 0.0000000  | 2.0484865  | 2.4903023  |
| C  | 0.0000000  | -1.1920968 | 4.4693159  |
| H  | 0.0000000  | -2.0484865 | 2.4903023  |
| C  | 0.0000000  | 0.0000000  | 5.1761713  |
| H  | -0.0000000 | 2.1481757  | 4.9794153  |
| H  | -0.0000000 | -2.1481757 | 4.9794153  |
| H  | 0.0000000  | 0.0000000  | 6.2605357  |

## Cartesian coordinates of the optimized pentafluoriodobenzene dimers

### 1A: C<sub>6</sub>F<sub>5</sub>I

|    |            |            |            |
|----|------------|------------|------------|
| C  | 1.2062052  | 2.4956899  | 3.2513326  |
| H  | 2.1357008  | 3.0753694  | 3.2299275  |
| C  | -0.0000023 | 3.1816661  | 3.2036639  |
| H  | 0.0000028  | 4.2602936  | 3.1419921  |
| C  | -1.2062062 | 2.4957013  | 3.2513294  |
| H  | -2.1357058 | 3.0753702  | 3.2298005  |
| O  | 1.3632145  | 1.2477505  | 3.3214852  |
| O  | -1.3632261 | 1.2477547  | 3.3215171  |
| C  | -1.2062055 | -2.4956914 | 3.2513445  |
| H  | -2.1357018 | -3.0753611 | 3.2298267  |
| C  | -0.0000001 | -3.1816693 | 3.2037134  |
| H  | -0.0000098 | -4.2603112 | 3.1421068  |
| C  | 1.2062044  | -2.4957118 | 3.2512932  |
| H  | 2.1357049  | -3.0753874 | 3.2299004  |
| O  | -1.3632222 | -1.2477509 | 3.3215117  |
| O  | 1.3632177  | -1.2477549 | 3.3212978  |
| Ni | -0.0000063 | -0.0000020 | 3.3334014  |
| I  | 0.0000042  | -0.0000098 | 0.0206715  |
| C  | -0.0000105 | 0.0000031  | -2.0545093 |
| C  | -1.1917904 | 0.0000030  | -2.7648364 |
| C  | 1.1917768  | 0.0000054  | -2.7648197 |
| C  | -1.1993187 | 0.0000043  | -4.1502774 |
| F  | -2.3569306 | 0.0000012  | -2.1349197 |
| C  | 1.1993338  | 0.0000069  | -4.1502568 |
| F  | 2.3569047  | 0.0000055  | -2.1348823 |
| C  | 0.0000142  | 0.0000061  | -4.8436562 |
| F  | -2.3438359 | 0.0000035  | -4.8162767 |
| F  | 2.3438663  | 0.0000084  | -4.8162289 |
| F  | 0.0000223  | 0.0000066  | -6.1652459 |

### 1B: C<sub>6</sub>F<sub>5</sub>I

|   |           |           |            |
|---|-----------|-----------|------------|
| C | 1.2300171 | 3.0415665 | -2.8832664 |
|---|-----------|-----------|------------|

|    |            |            |            |
|----|------------|------------|------------|
| H  | 2.1056901  | 3.6869578  | -2.8597361 |
| C  | 0.0000004  | 3.6704040  | -2.8423372 |
| H  | -0.0000000 | 4.7532535  | -2.7836622 |
| C  | -1.2300105 | 3.0415538  | -2.8832868 |
| H  | -2.1056943 | 3.6869591  | -2.8597761 |
| C  | -1.2300125 | -3.0415529 | -2.8832778 |
| H  | -2.1056943 | -3.6869589 | -2.8597590 |
| C  | 0.0000029  | -3.6704075 | -2.8423385 |
| H  | -0.0000033 | -4.7532523 | -2.7836624 |
| C  | 1.2300156  | -3.0415626 | -2.8832760 |
| H  | 2.1056916  | -3.6869592 | -2.8597528 |
| S  | -1.6417819 | 1.4333186  | -2.9657619 |
| S  | 1.6417778  | 1.4333150  | -2.9657343 |
| S  | -1.6417808 | -1.4333190 | -2.9657508 |
| S  | 1.6417784  | -1.4333170 | -2.9657447 |
| Ni | -0.0000036 | -0.0000002 | -2.9803165 |
| I  | -0.0000041 | -0.0000007 | 0.5405828  |
| C  | -0.0000144 | -0.0000001 | 2.6160983  |
| C  | 1.1913921  | 0.0000001  | 3.3271473  |
| C  | -1.1913977 | -0.0000000 | 3.3271586  |
| C  | 1.1991872  | 0.0000003  | 4.7125550  |
| F  | 2.3569007  | 0.0000000  | 2.6973982  |
| C  | -1.1991772 | 0.0000002  | 4.7125820  |
| F  | -2.3569269 | -0.0000001 | 2.6974273  |
| C  | 0.0000047  | 0.0000003  | 5.4060943  |
| F  | 2.3438852  | 0.0000004  | 5.3787283  |
| F  | -2.3438631 | 0.0000002  | 5.3787636  |
| F  | 0.0000211  | 0.0000004  | 6.7279583  |

**2A:C<sub>6</sub>F<sub>5</sub>I**

|   |           |            |           |
|---|-----------|------------|-----------|
| C | 2.4996290 | -1.2159909 | 3.2071301 |
| H | 3.1065488 | -2.1271556 | 3.2072258 |
| C | 3.1617778 | 0.0000000  | 3.2078008 |
| C | 2.4996290 | 1.2159909  | 3.2071301 |
| H | 3.1065488 | 2.1271556  | 3.2072258 |

|    |            |            |            |
|----|------------|------------|------------|
| O  | 1.2478504  | -1.3666900 | 3.2070725  |
| O  | 1.2478504  | 1.3666900  | 3.2070725  |
| C  | -2.4996290 | 1.2159909  | 3.2071301  |
| H  | -3.1065488 | 2.1271556  | 3.2072258  |
| C  | -3.1617778 | 0.0000000  | 3.2078008  |
| C  | -2.4996290 | -1.2159909 | 3.2071301  |
| H  | -3.1065488 | -2.1271556 | 3.2072258  |
| O  | -1.2478504 | 1.3666900  | 3.2070725  |
| O  | -1.2478504 | -1.3666900 | 3.2070725  |
| Ni | 0.0000000  | -0.0000000 | 3.2119610  |
| F  | 4.5098534  | -0.0000000 | 3.2080453  |
| F  | -4.5098534 | -0.0000000 | 3.2080453  |
| I  | -0.0000000 | -0.0000000 | -0.5387882 |
| C  | -0.0000000 | -0.0000000 | -2.6107007 |
| C  | 0.0000000  | 1.1926666  | -3.3206109 |
| C  | 0.0000000  | -1.1926666 | -3.3206108 |
| C  | 0.0000000  | 1.1994123  | -4.7062434 |
| F  | 0.0000000  | 2.3569856  | -2.6902811 |
| C  | 0.0000000  | -1.1994123 | -4.7062434 |
| F  | -0.0000000 | -2.3569856 | -2.6902812 |
| C  | -0.0000000 | -0.0000000 | -5.3992683 |
| F  | -0.0000000 | 2.3431079  | -5.3725225 |
| F  | -0.0000000 | -2.3431079 | -5.3725225 |
| F  | 0.0000000  | 0.0000000  | -6.7201793 |

**2B:C<sub>6</sub>F<sub>5</sub>I**

|   |            |            |           |
|---|------------|------------|-----------|
| C | 3.0363740  | -1.2364193 | 2.7271518 |
| H | 3.7129414  | -2.0877281 | 2.7045269 |
| C | 3.6390543  | -0.0000011 | 2.6923675 |
| C | 3.0363796  | 1.2364195  | 2.7271411 |
| H | 3.7129437  | 2.0877396  | 2.7045080 |
| C | -3.0363795 | 1.2364182  | 2.7271372 |
| H | -3.7129450 | 2.0877400  | 2.7045066 |
| C | -3.6390556 | -0.0000010 | 2.6923636 |
| C | -3.0363730 | -1.2364187 | 2.7271500 |

|    |            |            |            |
|----|------------|------------|------------|
| H  | -3.7129432 | -2.0877290 | 2.7045277  |
| F  | 4.9874895  | -0.0000035 | 2.6267093  |
| F  | -4.9874902 | -0.0000030 | 2.6267047  |
| S  | 1.4283120  | 1.6462617  | 2.7987504  |
| S  | 1.4283198  | -1.6462578 | 2.7987674  |
| S  | -1.4283132 | 1.6462612  | 2.7987520  |
| S  | -1.4283217 | -1.6462581 | 2.7987704  |
| Ni | -0.0000002 | -0.0000087 | 2.8135459  |
| I  | -0.0000002 | -0.0000228 | -0.7291061 |
| C  | 0.0000003  | -0.0000075 | -2.8038017 |
| C  | 0.0000005  | 1.1918995  | -3.5138457 |
| C  | 0.0000005  | -1.1919073 | -3.5138586 |
| C  | 0.0000008  | 1.1994651  | -4.8992536 |
| F  | 0.0000004  | 2.3566965  | -2.8831687 |
| C  | 0.0000008  | -1.1994591 | -4.8992645 |
| F  | 0.0000004  | -2.3567079 | -2.8831914 |
| C  | 0.0000010  | 0.0000066  | -5.5925556 |
| F  | 0.0000009  | 2.3437959  | -5.5651342 |
| F  | 0.0000008  | -2.3437825 | -5.5651552 |
| F  | 0.0000012  | 0.0000117  | -6.9139068 |

**3A:C<sub>6</sub>F<sub>5</sub>I**

|   |            |            |           |
|---|------------|------------|-----------|
| C | 2.4977712  | -1.2184201 | 3.1057421 |
| H | 3.0834945  | -2.1432547 | 3.1025119 |
| C | 3.1924662  | -0.0000001 | 3.1050710 |
| C | 2.4977712  | 1.2184202  | 3.1057421 |
| H | 3.0834945  | 2.1432547  | 3.1025119 |
| O | 1.2540409  | -1.3585421 | 3.1098696 |
| O | 1.2540409  | 1.3585421  | 3.1098696 |
| C | -2.4978172 | 1.2184046  | 3.1057419 |
| H | -3.0834918 | 2.1432528  | 3.1025117 |
| C | -3.1924517 | -0.0000000 | 3.1050713 |
| C | -2.4978172 | -1.2184045 | 3.1057419 |
| H | -3.0834919 | -2.1432528 | 3.1025117 |
| O | -1.2540126 | 1.3585451  | 3.1098693 |

|    |            |            |            |
|----|------------|------------|------------|
| O  | -1.2540127 | -1.3585451 | 3.1098693  |
| Ni | 0.0000064  | -0.0000000 | 3.1162740  |
| C  | -4.6120354 | -0.0000000 | 3.1051584  |
| C  | 4.6120383  | 0.0000000  | 3.1051574  |
| N  | 5.7644820  | 0.0000000  | 3.1073769  |
| N  | -5.7644761 | -0.0000000 | 3.1073769  |
| I  | 0.0000004  | 0.0000000  | -0.6378516 |
| C  | 0.0000000  | 0.0000002  | -2.7087018 |
| C  | 0.0000000  | 1.1934906  | -3.4166067 |
| C  | 0.0000000  | -1.1934909 | -3.4166068 |
| C  | 0.0000000  | 1.1999709  | -4.8021477 |
| F  | 0.0000000  | 2.3566997  | -2.7848644 |
| C  | 0.0000000  | -1.1999704 | -4.8021477 |
| F  | -0.0000000 | -2.3566996 | -2.7848644 |
| C  | 0.0000001  | -0.0000004 | -5.4949938 |
| F  | 0.0000000  | 2.3431665  | -5.4675140 |
| F  | 0.0000000  | -2.3431666 | -5.4675141 |
| F  | -0.0000000 | 0.0000000  | -6.8149595 |

**3B:C<sub>6</sub>F<sub>5</sub>I**

|    |            |            |            |
|----|------------|------------|------------|
| C  | -3.0334054 | 1.2384846  | -2.6687851 |
| H  | -3.6836692 | 2.1101738  | -2.6420339 |
| C  | -3.6702837 | 0.0000121  | -2.6221268 |
| C  | -3.0334422 | -1.2384969 | -2.6687901 |
| H  | -3.6836628 | -2.1101638 | -2.6420438 |
| C  | 3.0334570  | -1.2384929 | -2.6688149 |
| H  | 3.6836749  | -2.1101539 | -2.6420521 |
| C  | 3.6702640  | -0.0000058 | -2.6221205 |
| C  | 3.0334261  | 1.2385043  | -2.6688087 |
| H  | 3.6836737  | 2.1101555  | -2.6420386 |
| Ni | 0.0000085  | 0.0000046  | -2.7779894 |
| C  | 5.0963355  | 0.0000017  | -2.5364544 |
| C  | -5.0963568 | 0.0000006  | -2.5365244 |
| N  | -6.2463507 | 0.0000031  | -2.4684646 |
| N  | 6.2463246  | 0.0000027  | -2.4684052 |

|   |            |            |            |
|---|------------|------------|------------|
| S | 1.4324514  | -1.6395596 | -2.7616374 |
| S | 1.4324686  | 1.6395556  | -2.7616307 |
| S | -1.4324647 | 1.6395463  | -2.7615437 |
| S | -1.4324401 | -1.6395529 | -2.7615499 |
| I | -0.0000020 | -0.0000018 | 0.7885352  |
| C | 0.0000004  | 0.0000141  | 2.8617060  |
| C | -0.0000004 | -1.1928473 | 3.5699366  |
| C | 0.0000003  | 1.1928465  | 3.5698933  |
| C | -0.0000012 | -1.1999884 | 4.9553079  |
| F | -0.0000007 | -2.3563721 | 2.9375166  |
| C | -0.0000005 | 1.1999578  | 4.9552967  |
| F | 0.0000004  | 2.3563445  | 2.9375266  |
| C | -0.0000011 | 0.0000025  | 5.6481978  |
| F | -0.0000019 | -2.3436432 | 5.6206448  |
| F | -0.0000007 | 2.3436650  | 5.6206445  |
| F | -0.0000014 | 0.0000034  | 6.9686008  |

**4A: C<sub>6</sub>F<sub>5</sub>I**

|    |            |            |           |
|----|------------|------------|-----------|
| C  | 2.4981927  | -1.2241230 | 2.8853498 |
| H  | 3.0976872  | -2.1369978 | 2.8825986 |
| C  | 3.1715966  | 0.0000091  | 2.8847803 |
| C  | 2.4981852  | 1.2241131  | 2.8853498 |
| H  | 3.0976878  | 2.1369990  | 2.8825986 |
| O  | 1.2536718  | -1.3603132 | 2.8887529 |
| O  | 1.2536800  | 1.3603146  | 2.8887529 |
| C  | -2.4981902 | 1.2241166  | 2.8853498 |
| H  | -3.0976874 | 2.1369983  | 2.8825986 |
| C  | -3.1715960 | 0.0000027  | 2.8847803 |
| C  | -2.4981928 | -1.2241194 | 2.8853498 |
| H  | -3.0976873 | -2.1369981 | 2.8825986 |
| O  | -1.2536751 | 1.3603143  | 2.8887529 |
| O  | -1.2536722 | -1.3603138 | 2.8887529 |
| Ni | -0.0000002 | -0.0000007 | 2.8951394 |
| N  | -4.6145746 | -0.0000086 | 2.8849328 |
| N  | 4.6145753  | -0.0000352 | 2.8849328 |



|   |            |            |            |
|---|------------|------------|------------|
| O | -5.1777646 | -1.0760823 | 2.8854280  |
| O | -5.1777685 | 1.0760904  | 2.8854280  |
| O | 5.1777581  | -1.0760691 | 2.8854279  |
| O | 5.1777743  | 1.0761028  | 2.8854280  |
| I | -0.0000000 | -0.0000000 | -0.8727125 |
| C | 0.0000000  | -0.0000009 | -2.9431627 |
| C | -0.0000001 | 1.1935547  | -3.6507164 |
| C | -0.0000000 | -1.1935531 | -3.6507154 |
| C | 0.0000000  | 1.1999788  | -5.0361427 |
| F | 0.0000000  | 2.3564663  | -3.0189220 |
| C | 0.0000000  | -1.1999816 | -5.0361429 |
| F | 0.0000000  | -2.3564665 | -3.0189220 |
| C | -0.0000000 | 0.0000020  | -5.7289820 |
| F | -0.0000000 | 2.3432578  | -5.7011429 |
| F | -0.0000000 | -2.3432571 | -5.7011425 |
| F | 0.0000000  | -0.0000003 | -7.0487686 |

**4B: C<sub>6</sub>F<sub>5</sub>I**

|   |            |            |           |
|---|------------|------------|-----------|
| C | 3.0317772  | -1.2399574 | 2.5276489 |
| H | 3.7051327  | -2.0930801 | 2.5254030 |
| C | 3.6436869  | 0.0000061  | 2.5418010 |
| C | 3.0317926  | 1.2398271  | 2.5276498 |
| H | 3.7052410  | 2.0929351  | 2.5253996 |
| C | -3.0317857 | 1.2398834  | 2.5276484 |
| H | -3.7052425 | 2.0929106  | 2.5253982 |
| C | -3.6436866 | -0.0000885 | 2.5418011 |
| C | -3.0317898 | -1.2398957 | 2.5276504 |
| H | -3.7051311 | -2.0931047 | 2.5254042 |
| N | -5.1181428 | 0.0000458  | 2.5678140 |
| N | 5.1181821  | 0.0000192  | 2.5678146 |
| O | -5.6795677 | -1.0738615 | 2.5794472 |
| O | -5.6794900 | 1.0739974  | 2.5794263 |
| O | 5.6795588  | -1.0738449 | 2.5794474 |
| O | 5.6794606  | 1.0739649  | 2.5794253 |
| S | 1.4305351  | 1.6434722  | 2.5112125 |

|    |            |            |            |
|----|------------|------------|------------|
| S  | 1.4304949  | -1.6433691 | 2.5112033  |
| S  | -1.4304848 | -1.6433801 | 2.5112010  |
| S  | -1.4305407 | 1.6434637  | 2.5112148  |
| Ni | -0.0000000 | 0.0000796  | 2.5286382  |
| I  | -0.0000001 | -0.0000104 | -1.0544580 |
| C  | 0.0000000  | -0.0000114 | -3.1276561 |
| C  | 0.0000001  | -1.1928345 | -3.8360834 |
| C  | -0.0000000 | 1.1928298  | -3.8360693 |
| C  | -0.0000000 | -1.1999389 | -5.2214720 |
| F  | 0.0000002  | -2.3565454 | -3.2042771 |
| C  | -0.0000000 | 1.1999656  | -5.2214816 |
| F  | -0.0000001 | 2.3565194  | -3.2042443 |
| C  | -0.0000000 | 0.0000008  | -5.9145224 |
| F  | -0.0000001 | -2.3440146 | -5.8861285 |
| F  | 0.0000001  | 2.3440141  | -5.8861140 |
| F  | -0.0000000 | 0.0000025  | -7.2348955 |

**5A: C<sub>6</sub>F<sub>5</sub>I**

|    |            |            |           |
|----|------------|------------|-----------|
| C  | 2.5032365  | -1.1973807 | 3.0207686 |
| H  | 3.0809815  | -2.1303783 | 3.0067018 |
| C  | 3.2069512  | 0.0001053  | 2.9555273 |
| C  | 2.5031861  | 1.1975693  | 3.0208868 |
| H  | 3.0808245  | 2.1306274  | 3.0072567 |
| O  | 1.2512793  | -1.3503081 | 3.1007786 |
| O  | 1.2512388  | 1.3503542  | 3.1004626 |
| C  | -2.5031935 | 1.1975365  | 3.0208801 |
| H  | -3.0808379 | 2.1306546  | 3.0071347 |
| C  | -3.2069636 | 0.0001076  | 2.9555554 |
| C  | -2.5032392 | -1.1973773 | 3.0207860 |
| H  | -3.0809993 | -2.1303702 | 3.0068194 |
| O  | -1.2512753 | 1.3503521  | 3.1005806 |
| O  | -1.2512614 | -1.3503220 | 3.1006344 |
| Ni | -0.0000066 | -0.0000065 | 3.1109007 |
| N  | -4.6286203 | -0.0001068 | 2.9382170 |
| N  | 4.6286285  | 0.0000391  | 2.9381915 |

|   |            |            |            |
|---|------------|------------|------------|
| H | -4.9946751 | 0.8143589  | 2.4649048  |
| H | -4.9943097 | -0.8147698 | 2.4648841  |
| H | 4.9946120  | 0.8142839  | 2.4645284  |
| H | 4.9944203  | -0.8148477 | 2.4653229  |
| I | 0.0000359  | 0.0001337  | -0.1510386 |
| C | 0.0000047  | -0.0000324 | -2.2286926 |
| C | 0.0000039  | 1.1912875  | -2.9395888 |
| C | -0.0000044 | -1.1913780 | -2.9395888 |
| C | 0.0000004  | 1.1992339  | -4.3250314 |
| F | 0.0000087  | 2.3568820  | -2.3098553 |
| C | -0.0000061 | -1.1992774 | -4.3250670 |
| F | -0.0000089 | -2.3569772 | -2.3099073 |
| C | -0.0000022 | -0.0000031 | -5.0185927 |
| F | 0.0000015  | 2.3439644  | -4.9910380 |
| F | -0.0000093 | -2.3439612 | -4.9911076 |
| F | -0.0000009 | 0.0000062  | -6.3403318 |

**5B: C<sub>6</sub>F<sub>5</sub>I**

|   |            |            |           |
|---|------------|------------|-----------|
| C | 3.0461748  | -1.2193614 | 2.7588725 |
| H | 3.6813883  | -2.1045650 | 2.7464908 |
| C | 3.7033939  | -0.0000189 | 2.6849967 |
| C | 3.0453448  | 1.2189010  | 2.7580256 |
| H | 3.6800241  | 2.1044679  | 2.7447076 |
| C | -3.0454652 | 1.2184569  | 2.7577181 |
| H | -3.6798809 | 2.1041945  | 2.7438509 |
| C | -3.7034747 | -0.0004555 | 2.6849028 |
| C | -3.0460068 | -1.2197125 | 2.7589715 |
| H | -3.6811629 | -2.1049577 | 2.7474662 |
| N | -5.1115956 | -0.0006559 | 2.6307351 |
| N | 5.1115125  | 0.0007772  | 2.6308508 |
| H | -5.4950515 | 0.8276231  | 2.2013999 |
| H | -5.4945651 | -0.8211500 | 2.1862407 |
| H | 5.4940157  | 0.8260785  | 2.1949587 |
| H | 5.4953236  | -0.8227780 | 2.1928273 |
| S | 1.4362290  | 1.6230822  | 2.8771997 |

|    |            |            |            |
|----|------------|------------|------------|
| S  | 1.4371351  | -1.6244322 | 2.8777172  |
| S  | -1.4363495 | 1.6227131  | 2.8776875  |
| S  | -1.4368608 | -1.6244855 | 2.8766263  |
| Ni | 0.0000702  | -0.0009944 | 2.8790415  |
| I  | -0.0000621 | 0.0001245  | -0.5587126 |
| C  | 0.0000354  | -0.0000897 | -2.6377330 |
| C  | 0.0000328  | 1.1905900  | -3.3498072 |
| C  | 0.0000320  | -1.1909164 | -3.3495640 |
| C  | -0.0000250 | 1.1986774  | -4.7352689 |
| F  | 0.0000714  | 2.3569397  | -2.7207458 |
| C  | -0.0000261 | -1.1992873 | -4.7350237 |
| F  | 0.0000670  | -2.3571317 | -2.7202577 |
| C  | -0.0000758 | -0.0003739 | -5.4289244 |
| F  | -0.0000391 | 2.3435852  | -5.4017461 |
| F  | -0.0000409 | -2.3443366 | -5.4012654 |
| F  | -0.0001686 | -0.0005087 | -6.7511232 |

**6A: C<sub>6</sub>F<sub>5</sub>I**

|    |            |            |           |
|----|------------|------------|-----------|
| C  | 2.5102195  | -1.1956728 | 2.5622394 |
| H  | 3.0604508  | -2.1386116 | 2.5673824 |
| C  | 3.2274126  | -0.0001422 | 2.4451726 |
| C  | 2.5102895  | 1.1954734  | 2.5623277 |
| H  | 3.0605159  | 2.1383776  | 2.5675259 |
| O  | 1.2583261  | -1.3346879 | 2.6762358 |
| O  | 1.2583635  | 1.3345099  | 2.6763090 |
| C  | -2.5104532 | 1.1955581  | 2.5620474 |
| H  | -3.0606173 | 2.1384892  | 2.5670655 |
| C  | -3.2276237 | -0.0000373 | 2.4450250 |
| C  | -2.5104521 | -1.1956261 | 2.5622703 |
| H  | -3.0606477 | -2.1385713 | 2.5674853 |
| O  | -1.2585137 | 1.3345514  | 2.6761083 |
| O  | -1.2585825 | -1.3346277 | 2.6763182 |
| Ni | -0.0001088 | -0.0000554 | 2.6728487 |
| N  | -4.6269721 | 0.0000528  | 2.2223835 |
| N  | 4.6268020  | -0.0001544 | 2.2225740 |

|   |            |            |            |
|---|------------|------------|------------|
| C | -5.3257663 | -1.2099543 | 2.5784210  |
| H | -5.1852218 | -1.5062143 | 3.6320405  |
| H | -6.3916311 | -1.0638013 | 2.4040426  |
| H | -5.0130913 | -2.0447672 | 1.9461359  |
| C | -5.3258366 | 1.2099177  | 2.5789048  |
| H | -5.0133215 | 2.0449983  | 1.9468747  |
| H | -6.3916896 | 1.0637834  | 2.4045904  |
| H | -5.1852080 | 1.5058314  | 3.6326161  |
| C | 5.3256531  | 1.2097494  | 2.5788368  |
| H | 5.1850848  | 1.5058256  | 3.6325138  |
| H | 6.3915075  | 1.0636148  | 2.4045110  |
| H | 5.0130843  | 2.0446940  | 1.9466543  |
| C | 5.3255724  | -1.2100912 | 2.5789201  |
| H | 5.0129936  | -2.0450190 | 1.9467325  |
| H | 6.3914594  | -1.0639584 | 2.4046242  |
| H | 5.1849724  | -1.5061422 | 3.6325825  |
| I | -0.0000530 | -0.0001721 | -0.6127513 |
| C | 0.0000305  | 0.0000179  | -2.6907759 |
| C | 0.0000123  | -1.1911621 | -3.4023415 |
| C | 0.0000864  | 1.1912509  | -3.4022691 |
| C | 0.0000541  | -1.1990298 | -4.7879049 |
| F | -0.0000568 | -2.3571936 | -2.7733793 |
| C | 0.0001367  | 1.1991817  | -4.7878379 |
| F | 0.0000793  | 2.3572652  | -2.7732418 |
| C | 0.0001191  | 0.0001027  | -5.4814923 |
| F | 0.0000219  | -2.3439069 | -5.4543088 |
| F | 0.0001931  | 2.3440829  | -5.4541880 |
| F | 0.0001557  | 0.0001416  | -6.8035905 |

**6B:C<sub>6</sub>F<sub>5</sub>I**

|   |           |            |            |
|---|-----------|------------|------------|
| C | 3.0593667 | -1.2147779 | -2.4377648 |
| H | 3.6595017 | -2.1175939 | -2.4429659 |
| C | 3.7444991 | -0.0002004 | -2.4213524 |
| C | 3.0594584 | 1.2144721  | -2.4377921 |
| H | 3.6596658 | 2.1171942  | -2.4430159 |

|    |            |            |            |
|----|------------|------------|------------|
| C  | -3.0595634 | 1.2146436  | -2.4376258 |
| H  | -3.6597305 | 2.1173908  | -2.4427286 |
| C  | -3.7447062 | -0.0000113 | -2.4214434 |
| C  | -3.0596345 | -1.2146558 | -2.4380048 |
| H  | -3.6598293 | -2.1174312 | -2.4434682 |
| N  | -5.1475792 | 0.0000576  | -2.3765239 |
| N  | 5.1473725  | -0.0002876 | -2.3763110 |
| C  | -5.8335706 | 1.2222414  | -2.7149055 |
| H  | -5.5727192 | 1.6055199  | -3.7139924 |
| H  | -6.9070167 | 1.0413032  | -2.6907752 |
| H  | -5.6294369 | 2.0093088  | -1.9839835 |
| C  | -5.8336269 | -1.2220130 | -2.7149383 |
| H  | -5.6294725 | -2.0091614 | -1.9840608 |
| H  | -6.9070664 | -1.0410755 | -2.6907470 |
| H  | -5.5728546 | -1.6052760 | -3.7140640 |
| C  | 5.8334073  | -1.2223769 | -2.7146369 |
| H  | 5.5726723  | -1.6057124 | -3.7137576 |
| H  | 6.9068271  | -1.0414701 | -2.6903991 |
| H  | 5.6291693  | -2.0095100 | -1.9837249 |
| C  | 5.8334666  | 1.2219119  | -2.7144399 |
| H  | 5.6292351  | 2.0088783  | -1.9834115 |
| H  | 6.9068858  | 1.0409323  | -2.6902016 |
| H  | 5.5727569  | 1.6053615  | -3.7134851 |
| S  | -1.4420306 | -1.6078160 | -2.4414366 |
| S  | -1.4419850 | 1.6077341  | -2.4411232 |
| S  | 1.4417415  | -1.6078728 | -2.4413952 |
| S  | 1.4418828  | 1.6076721  | -2.4413828 |
| Ni | -0.0000989 | -0.0000343 | -2.4415634 |
| I  | -0.0000701 | -0.0003593 | 1.0601418  |
| C  | 0.0000212  | -0.0001132 | 3.1386207  |
| C  | 0.0000036  | -1.1907431 | 3.8512285  |
| C  | 0.0000628  | 1.1906904  | 3.8509424  |
| C  | 0.0000290  | -1.1987405 | 5.2367404  |
| F  | -0.0000228 | -2.3574363 | 3.2229139  |
| C  | 0.0001615  | 1.1990063  | 5.2364605  |

|   |            |            |           |
|---|------------|------------|-----------|
| F | 0.0000394  | 2.3572292  | 3.2223706 |
| C | 0.0001408  | 0.0002119  | 5.9303944 |
| F | -0.0000464 | -2.3438578 | 5.9035063 |
| F | 0.0002682  | 2.3442736  | 5.9029684 |
| F | 0.0001745  | 0.0003641  | 7.2529267 |

**7A:C<sub>6</sub>F<sub>5</sub>I**

|    |            |            |            |
|----|------------|------------|------------|
| C  | 2.5076713  | -1.1917807 | -2.5392161 |
| H  | 3.0615320  | -2.1345942 | -2.5362797 |
| C  | 3.2311065  | -0.0000217 | -2.5216538 |
| C  | 2.5076872  | 1.1918071  | -2.5392127 |
| H  | 3.0615296  | 2.1345857  | -2.5362814 |
| O  | 1.2548394  | -1.3431709 | -2.5575645 |
| O  | 1.2548218  | 1.3431687  | -2.5575688 |
| C  | -2.5076773 | 1.1917952  | -2.5392151 |
| H  | -3.0615319 | 2.1345922  | -2.5362845 |
| C  | -3.2311088 | 0.0000042  | -2.5216521 |
| C  | -2.5076780 | -1.1918023 | -2.5392154 |
| H  | -3.0615266 | -2.1345853 | -2.5362882 |
| O  | -1.2548304 | 1.3431704  | -2.5575666 |
| O  | -1.2548288 | -1.3431688 | -2.5575661 |
| Ni | 0.0000012  | -0.0000029 | -2.5617067 |
| C  | -4.7595876 | -0.0000048 | -2.5702807 |
| C  | 4.7595881  | 0.0000016  | -2.5702818 |
| C  | -5.3379992 | 1.2335156  | -1.8703653 |
| H  | -5.1045328 | 2.1615020  | -2.3964957 |
| H  | -6.4272748 | 1.1568149  | -1.8341406 |
| H  | -4.9688842 | 1.3179045  | -0.8453081 |
| C  | -5.3380128 | -1.2335069 | -1.8703644 |
| H  | -6.4272658 | -1.1568163 | -1.8341408 |
| H  | -5.1045293 | -2.1615069 | -2.3964994 |
| H  | -4.9688810 | -1.3179048 | -0.8453068 |
| C  | -5.2177909 | 0.0000060  | -4.0331588 |
| H  | -6.3098032 | -0.0000012 | -4.1021585 |
| H  | -4.8434715 | 0.8827141  | -4.5578888 |

|   |            |            |            |
|---|------------|------------|------------|
| H | -4.8434689 | -0.8827200 | -4.5578913 |
| C | 5.2177912  | 0.0000031  | -4.0331600 |
| H | 4.8434697  | 0.8827148  | -4.5578899 |
| H | 6.3098021  | -0.0000015 | -4.1021603 |
| H | 4.8434678  | -0.8827195 | -4.5578914 |
| C | 5.3380042  | 1.2335129  | -1.8703664 |
| H | 6.4272736  | 1.1568184  | -1.8341428 |
| H | 5.1045306  | 2.1615038  | -2.3964972 |
| H | 4.9688857  | 1.3179029  | -0.8453077 |
| C | 5.3380096  | -1.2335086 | -1.8703651 |
| H | 4.9688842  | -1.3179027 | -0.8453077 |
| H | 5.1045288  | -2.1615058 | -2.3964998 |
| H | 6.4272684  | -1.1568193 | -1.8341428 |
| I | -0.0000004 | -0.0000013 | 0.7345957  |
| C | -0.0000007 | 0.0000025  | 2.8114968  |
| C | -0.0000008 | -1.1913233 | 3.5226369  |
| C | -0.0000007 | 1.1913134  | 3.5226332  |
| C | -0.0000008 | -1.1991522 | 4.9080866  |
| F | -0.0000011 | -2.3570148 | 2.8934993  |
| C | -0.0000007 | 1.1991597  | 4.9080881  |
| F | -0.0000009 | 2.3570254  | 2.8934982  |
| C | -0.0000007 | -0.0000112 | 5.6015124  |
| F | -0.0000010 | -2.3438774 | 5.5742749  |
| F | -0.0000007 | 2.3438849  | 5.5742814  |
| F | -0.0000006 | 0.0000012  | 6.9232727  |

**7B:C<sub>6</sub>F<sub>5</sub>I**

|   |            |            |            |
|---|------------|------------|------------|
| C | 3.0414722  | -1.2150360 | -2.4425565 |
| H | 3.6504598  | -2.1135158 | -2.4124211 |
| C | 3.7107327  | -0.0063798 | -2.3175354 |
| C | 3.0464105  | 1.2040978  | -2.4530970 |
| H | 3.6594799  | 2.1001215  | -2.4322661 |
| C | -3.0414299 | 1.2150526  | -2.4424294 |
| H | -3.6503780 | 2.1135529  | -2.4121659 |
| C | -3.7107328 | 0.0064139  | -2.3175441 |



|    |            |            |            |
|----|------------|------------|------------|
| C  | -3.0464441 | -1.2040776 | -2.4532401 |
| H  | -3.6595584 | -2.1000851 | -2.4325561 |
| C  | -5.2392017 | 0.0074668  | -2.1421917 |
| C  | 5.2392111  | -0.0074463 | -2.1421908 |
| C  | -5.7117574 | 1.2432591  | -1.3714543 |
| H  | -5.5728641 | 2.1691751  | -1.9330513 |
| H  | -6.7815547 | 1.1584042  | -1.1681219 |
| H  | -5.1911245 | 1.3393101  | -0.4154648 |
| C  | -5.7107366 | -1.2214794 | -1.3595577 |
| H  | -6.7806898 | -1.1359654 | -1.1571102 |
| H  | -5.5707292 | -2.1526887 | -1.9119664 |
| H  | -5.1897727 | -1.3078107 | -0.4028965 |
| C  | -5.8922135 | 0.0010192  | -3.5281368 |
| H  | -6.9823254 | 0.0010022  | -3.4409983 |
| H  | -5.5958371 | 0.8815892  | -4.1036436 |
| H  | -5.5954248 | -0.8843392 | -4.0960653 |
| C  | 5.8922064  | -0.0010822 | -3.5281418 |
| H  | 5.5954930  | 0.8843009  | -4.0960801 |
| H  | 6.9823231  | -0.0011310 | -3.4410107 |
| H  | 5.5957669  | -0.8816320 | -4.1036280 |
| C  | 5.7107866  | 1.2215036  | -1.3596046 |
| H  | 6.7807470  | 1.1359810  | -1.1571667 |
| H  | 5.5708134  | 2.1527049  | -1.9120703 |
| H  | 5.1898359  | 1.3078801  | -0.4029514 |
| C  | 5.7117234  | -1.2432270 | -1.3714019 |
| H  | 5.1910911  | -1.3392462 | -0.4154205 |
| H  | 5.5728028  | -2.1691637 | -1.9329612 |
| H  | 6.7815237  | -1.1583851 | -1.1680803 |
| S  | -1.4400690 | 1.6176423  | -2.6485856 |
| S  | -1.4466850 | -1.6116160 | -2.6598845 |
| S  | 1.4401083  | -1.6175525 | -2.6487804 |
| S  | 1.4466552  | 1.6117130  | -2.6596756 |
| Ni | 0.0000059  | 0.0000471  | -2.6497417 |
| I  | -0.0000656 | -0.0001980 | 0.7704788  |
| C  | -0.0000406 | -0.0000986 | 2.8490855  |

|   |            |            |           |
|---|------------|------------|-----------|
| C | -0.1079706 | -1.1857911 | 3.5613629 |
| C | 0.1079279  | 1.1856556  | 3.5612446 |
| C | -0.1075788 | -1.1940692 | 4.9467373 |
| F | -0.2155125 | -2.3476539 | 2.9335745 |
| C | 0.1075902  | 1.1940833  | 4.9466140 |
| F | 0.2154352  | 2.3474665  | 2.9333246 |
| C | 0.0000140  | 0.0000451  | 5.6407380 |
| F | -0.2100058 | -2.3353688 | 5.6115592 |
| F | 0.2100451  | 2.3354500  | 5.6113147 |
| F | 0.0000414  | 0.0001015  | 6.9629201 |

**8A:C<sub>6</sub>F<sub>5</sub>I**

|    |            |            |            |
|----|------------|------------|------------|
| C  | -2.5829911 | 1.2286493  | 2.7975251  |
| H  | -3.2075079 | 2.1289953  | 2.7809208  |
| C  | -3.2344082 | -0.0000000 | 2.7667804  |
| H  | -4.3145852 | 0.0000000  | 2.7222959  |
| C  | -2.5829911 | -1.2286493 | 2.7975251  |
| H  | -3.2075079 | -2.1289953 | 2.7809208  |
| O  | -1.3458692 | 1.4578519  | 2.8451151  |
| O  | -1.3458692 | -1.4578519 | 2.8451151  |
| C  | 2.5829911  | -1.2286493 | 2.7975251  |
| H  | 3.2075079  | -2.1289953 | 2.7809208  |
| C  | 3.2344082  | 0.0000000  | 2.7667804  |
| H  | 4.3145852  | -0.0000000 | 2.7222959  |
| C  | 2.5829911  | 1.2286493  | 2.7975251  |
| H  | 3.2075079  | 2.1289953  | 2.7809208  |
| O  | 1.3458692  | -1.4578519 | 2.8451151  |
| O  | 1.3458692  | 1.4578519  | 2.8451151  |
| Pd | 0.0000000  | 0.0000000  | 2.8557893  |
| I  | -0.0000000 | 0.0000000  | -0.5392565 |
| C  | -0.0000000 | 0.0000000  | -2.6170800 |
| C  | -0.0000000 | -1.1915018 | -3.3278214 |
| C  | -0.0000000 | 1.1915018  | -3.3278214 |
| C  | 0.0000000  | -1.1993281 | -4.7132385 |
| F  | 0.0000000  | -2.3569756 | -2.6980116 |

|   |            |            |            |
|---|------------|------------|------------|
| C | 0.0000000  | 1.1993281  | -4.7132385 |
| F | 0.0000000  | 2.3569756  | -2.6980116 |
| C | 0.0000000  | 0.0000000  | -5.4064629 |
| F | -0.0000000 | -2.3438682 | -5.3795534 |
| F | 0.0000000  | 2.3438682  | -5.3795534 |
| F | -0.0000000 | 0.0000000  | -6.7281367 |

**8B:C<sub>6</sub>F<sub>5</sub>I**

|    |            |            |            |
|----|------------|------------|------------|
| C  | 3.1068934  | 1.2432872  | 2.8222445  |
| H  | 3.7823956  | 2.0966184  | 2.7954738  |
| C  | 3.7144119  | 0.0000000  | 2.7817092  |
| H  | 4.7974922  | 0.0000000  | 2.7210038  |
| C  | 3.1068934  | -1.2432872 | 2.8222445  |
| H  | 3.7823956  | -2.0966184 | 2.7954738  |
| C  | -3.1068934 | -1.2432872 | 2.8222445  |
| H  | -3.7823956 | -2.0966184 | 2.7954738  |
| C  | -3.7144119 | 0.0000000  | 2.7817092  |
| H  | -4.7974922 | 0.0000000  | 2.7210038  |
| C  | -3.1068934 | 1.2432872  | 2.8222445  |
| H  | -3.7823956 | 2.0966184  | 2.7954738  |
| S  | 1.5197157  | -1.7230203 | 2.9072411  |
| S  | 1.5197157  | 1.7230203  | 2.9072411  |
| S  | -1.5197157 | -1.7230203 | 2.9072411  |
| S  | -1.5197157 | 1.7230203  | 2.9072411  |
| Pd | 0.0000000  | 0.0000000  | 2.9231217  |
| I  | 0.0000000  | 0.0000000  | -0.5799227 |
| C  | 0.0000000  | 0.0000000  | -2.6581167 |
| C  | 0.0000000  | -1.1910470 | -3.3695031 |
| C  | 0.0000000  | 1.1910470  | -3.3695031 |
| C  | 0.0000000  | -1.1991273 | -4.7549589 |
| F  | 0.0000000  | -2.3569476 | -2.7399195 |
| C  | 0.0000000  | 1.1991273  | -4.7549589 |
| F  | 0.0000000  | 2.3569476  | -2.7399195 |
| C  | 0.0000000  | 0.0000000  | -5.4485696 |
| F  | -0.0000000 | -2.3439474 | -5.4212122 |

|   |            |           |            |
|---|------------|-----------|------------|
| F | -0.0000000 | 2.3439474 | -5.4212122 |
| F | 0.0000000  | 0.0000000 | -6.7705887 |

**9A: C<sub>6</sub>F<sub>5</sub>I**

|    |            |            |            |
|----|------------|------------|------------|
| C  | 2.5818690  | -1.2366121 | 2.8128890  |
| H  | 3.2333475  | -2.1164536 | 2.7910869  |
| C  | 3.2097008  | 0.0000000  | 2.7787036  |
| C  | 2.5818690  | 1.2366121  | 2.8128890  |
| H  | 3.2333475  | 2.1164536  | 2.7910869  |
| O  | 1.3430166  | -1.4600615 | 2.8687164  |
| O  | 1.3430166  | 1.4600615  | 2.8687164  |
| C  | -2.5818690 | 1.2366121  | 2.8128890  |
| H  | -3.2333475 | 2.1164536  | 2.7910869  |
| C  | -3.2097008 | 0.0000000  | 2.7787036  |
| C  | -2.5818690 | -1.2366121 | 2.8128890  |
| H  | -3.2333475 | -2.1164536 | 2.7910869  |
| O  | -1.3430166 | 1.4600615  | 2.8687164  |
| O  | -1.3430166 | -1.4600615 | 2.8687164  |
| F  | 4.5594761  | 0.0000000  | 2.7171476  |
| F  | -4.5594761 | -0.0000000 | 2.7171476  |
| Pd | -0.0000000 | 0.0000000  | 2.8805220  |
| I  | 0.0000000  | 0.0000000  | -0.5620489 |
| C  | -0.0000000 | 0.0000000  | -2.6378585 |
| C  | -0.0000000 | 1.1921528  | -3.3472870 |
| C  | -0.0000000 | -1.1921528 | -3.3472870 |
| C  | 0.0000000  | 1.1996171  | -4.7327179 |
| F  | -0.0000000 | 2.3567302  | -2.7164970 |
| C  | 0.0000000  | -1.1996171 | -4.7327179 |
| F  | -0.0000000 | -2.3567302 | -2.7164970 |
| C  | 0.0000000  | 0.0000000  | -5.4258353 |
| F  | 0.0000000  | 2.3437467  | -5.3986240 |
| F  | 0.0000000  | -2.3437467 | -5.3986240 |
| F  | -0.0000000 | 0.0000000  | -6.7469988 |

**9B: C<sub>6</sub>F<sub>5</sub>I**

|    |            |            |            |
|----|------------|------------|------------|
| C  | 3.1008745  | 1.2484419  | -2.8375133 |
| H  | 3.8069796  | 2.0761801  | -2.8133816 |
| C  | 3.6836844  | 0.0000000  | -2.8053424 |
| C  | 3.1008745  | -1.2484419 | -2.8375133 |
| H  | 3.8069796  | -2.0761801 | -2.8133816 |
| C  | -3.1008745 | -1.2484419 | -2.8375133 |
| H  | -3.8069796 | -2.0761801 | -2.8133816 |
| C  | -3.6836844 | -0.0000000 | -2.8053424 |
| C  | -3.1008745 | 1.2484419  | -2.8375133 |
| H  | -3.8069796 | 2.0761801  | -2.8133816 |
| F  | 5.0350782  | 0.0000000  | -2.7413778 |
| F  | -5.0350782 | 0.0000000  | -2.7413778 |
| S  | 1.5136041  | -1.7270698 | -2.9073164 |
| S  | 1.5136041  | 1.7270698  | -2.9073164 |
| S  | -1.5136041 | -1.7270698 | -2.9073164 |
| S  | -1.5136041 | 1.7270698  | -2.9073164 |
| Pd | 0.0000000  | 0.0000000  | -2.9233842 |
| I  | 0.0000000  | 0.0000000  | 0.6005376  |
| C  | 0.0000000  | 0.0000000  | 2.6776468  |
| C  | 0.0000000  | -1.1916131 | 3.3879741  |
| C  | 0.0000000  | 1.1916131  | 3.3879741  |
| C  | -0.0000000 | -1.1994393 | 4.7734084  |
| F  | -0.0000000 | -2.3567604 | 2.7574450  |
| C  | -0.0000000 | 1.1994393  | 4.7734084  |
| F  | -0.0000000 | 2.3567604  | 2.7574450  |
| C  | 0.0000000  | 0.0000000  | 5.4667257  |
| F  | 0.0000000  | -2.3438505 | 5.4394424  |
| F  | 0.0000000  | 2.3438505  | 5.4394424  |
| F  | 0.0000000  | 0.0000000  | 6.7882200  |

**10A:C<sub>6</sub>F<sub>5</sub>I**

|   |            |            |           |
|---|------------|------------|-----------|
| C | -2.5835875 | 1.2398685  | 2.6573521 |
| H | -3.2105395 | 2.1371388  | 2.6316432 |
| C | -3.2440699 | 0.0000000  | 2.6098645 |
| C | -2.5835875 | -1.2398685 | 2.6573521 |

|    |            |            |            |
|----|------------|------------|------------|
| H  | -3.2105395 | -2.1371388 | 2.6316432  |
| O  | -1.3523280 | 1.4489866  | 2.7297879  |
| O  | -1.3523280 | -1.4489866 | 2.7297879  |
| C  | 2.5835875  | -1.2398685 | 2.6573521  |
| H  | 3.2105395  | -2.1371388 | 2.6316432  |
| C  | 3.2440699  | 0.0000000  | 2.6098645  |
| C  | 2.5835875  | 1.2398685  | 2.6573521  |
| H  | 3.2105395  | 2.1371388  | 2.6316432  |
| O  | 1.3523280  | -1.4489866 | 2.7297879  |
| O  | 1.3523280  | 1.4489866  | 2.7297879  |
| Pd | 0.0000000  | 0.0000000  | 2.7446181  |
| C  | 4.6635764  | -0.0000000 | 2.5244667  |
| C  | -4.6635764 | -0.0000000 | 2.5244667  |
| N  | 5.8139135  | 0.0000000  | 2.4558123  |
| N  | -5.8139135 | -0.0000000 | 2.4558123  |
| I  | 0.0000000  | 0.0000000  | -0.7529363 |
| C  | 0.0000000  | 0.0000000  | -2.8264413 |
| C  | 0.0000000  | -1.1933205 | -3.5337595 |
| C  | 0.0000000  | 1.1933205  | -3.5337595 |
| C  | 0.0000000  | -1.2002333 | -4.9191524 |
| F  | -0.0000000 | -2.3564211 | -2.9011272 |
| C  | 0.0000000  | 1.2002333  | -4.9191524 |
| F  | -0.0000000 | 2.3564211  | -2.9011272 |
| C  | 0.0000000  | 0.0000000  | -5.6117701 |
| F  | 0.0000000  | -2.3436232 | -5.5844681 |
| F  | 0.0000000  | 2.3436232  | -5.5844681 |
| F  | -0.0000000 | 0.0000000  | -6.9318758 |

**10B: C<sub>6</sub>F<sub>5</sub>I**

|   |            |            |           |
|---|------------|------------|-----------|
| C | 3.1011599  | -1.2513943 | 2.6623344 |
| H | 3.7796883  | -2.1019204 | 2.6323240 |
| C | 3.7184620  | 0.0000000  | 2.6137840 |
| C | 3.1011599  | 1.2513943  | 2.6623344 |
| H | 3.7796883  | 2.1019204  | 2.6323240 |
| C | -3.1011599 | 1.2513943  | 2.6623344 |

|    |            |            |            |
|----|------------|------------|------------|
| H  | -3.7796883 | 2.1019204  | 2.6323240  |
| C  | -3.7184620 | 0.0000000  | 2.6137840  |
| C  | -3.1011599 | -1.2513943 | 2.6623344  |
| H  | -3.7796883 | -2.1019204 | 2.6323240  |
| S  | 1.5205800  | 1.7183621  | 2.7603749  |
| S  | 1.5205800  | -1.7183621 | 2.7603749  |
| S  | -1.5205800 | -1.7183621 | 2.7603749  |
| S  | -1.5205800 | 1.7183621  | 2.7603749  |
| Pd | 0.0000000  | 0.0000000  | 2.7790506  |
| C  | -5.1452802 | 0.0000000  | 2.5187310  |
| C  | 5.1452802  | 0.0000000  | 2.5187310  |
| N  | -6.2947779 | 0.0000000  | 2.4413533  |
| N  | 6.2947779  | 0.0000000  | 2.4413533  |
| I  | 0.0000000  | 0.0000000  | -0.7623131 |
| C  | 0.0000000  | 0.0000000  | -2.8375986 |
| C  | 0.0000000  | 1.1925065  | -3.5461801 |
| C  | 0.0000000  | -1.1925065 | -3.5461801 |
| C  | 0.0000000  | 1.1999328  | -4.9315526 |
| F  | -0.0000000 | 2.3564860  | -2.9141583 |
| C  | 0.0000000  | -1.1999328 | -4.9315526 |
| F  | 0.0000000  | -2.3564860 | -2.9141583 |
| C  | 0.0000000  | 0.0000000  | -5.6244361 |
| F  | 0.0000000  | 2.3437390  | -5.5969158 |
| F  | 0.0000000  | -2.3437390 | -5.5969158 |
| F  | 0.0000000  | 0.0000000  | -6.9449589 |

**11A: C<sub>6</sub>F<sub>5</sub>I**

|   |            |            |           |
|---|------------|------------|-----------|
| C | 2.5844656  | -1.2438433 | 2.5030668 |
| H | 3.2230512  | -2.1293848 | 2.4720034 |
| C | 3.2250266  | 0.0000000  | 2.4420832 |
| C | 2.5844656  | 1.2438433  | 2.5030668 |
| H | 3.2230512  | 2.1293848  | 2.4720034 |
| O | 1.3533490  | -1.4479268 | 2.5939452 |
| O | 1.3533490  | 1.4479268  | 2.5939452 |
| C | -2.5844656 | 1.2438433  | 2.5030668 |

|    |            |            |            |
|----|------------|------------|------------|
| H  | -3.2230512 | 2.1293848  | 2.4720034  |
| C  | -3.2250266 | 0.0000000  | 2.4420832  |
| C  | -2.5844656 | -1.2438433 | 2.5030668  |
| H  | -3.2230512 | -2.1293848 | 2.4720034  |
| O  | -1.3533490 | 1.4479268  | 2.5939452  |
| O  | -1.3533490 | -1.4479268 | 2.5939452  |
| N  | -4.6701669 | 0.0000000  | 2.3276522  |
| N  | 4.6701669  | 0.0000000  | 2.3276522  |
| O  | -5.2333160 | -1.0747286 | 2.2821698  |
| O  | -5.2333160 | 1.0747286  | 2.2821698  |
| O  | 5.2333160  | -1.0747286 | 2.2821698  |
| O  | 5.2333160  | 1.0747286  | 2.2821698  |
| Pd | 0.0000000  | 0.0000000  | 2.6103373  |
| I  | 0.0000000  | 0.0000000  | -0.8827550 |
| C  | 0.0000000  | 0.0000000  | -2.9562777 |
| C  | 0.0000000  | 1.1934909  | -3.6632996 |
| C  | 0.0000000  | -1.1934909 | -3.6632996 |
| C  | -0.0000000 | 1.2003116  | -5.0487069 |
| F  | 0.0000000  | 2.3562915  | -3.0303839 |
| C  | -0.0000000 | -1.2003116 | -5.0487069 |
| F  | -0.0000000 | -2.3562915 | -3.0303839 |
| C  | -0.0000000 | 0.0000000  | -5.7412079 |
| F  | -0.0000000 | 2.3435080  | -5.7141503 |
| F  | 0.0000000  | -2.3435080 | -5.7141503 |
| F  | 0.0000000  | 0.0000000  | -7.0612277 |

**11B:C<sub>6</sub>F<sub>5</sub>I**

|   |            |            |           |
|---|------------|------------|-----------|
| C | 3.1194531  | -1.2538093 | 2.4966433 |
| H | 3.8343371  | -2.0895541 | 2.4754000 |
| C | 3.7455869  | -0.0000000 | 2.4543405 |
| C | 3.1194531  | 1.2538093  | 2.4966433 |
| H | 3.8343371  | 2.0895541  | 2.4754000 |
| C | -3.1194531 | 1.2538093  | 2.4966433 |
| H | -3.8343371 | 2.0895541  | 2.4754000 |
| C | -3.7455869 | 0.0000000  | 2.4543405 |



|    |            |            |            |
|----|------------|------------|------------|
| C  | -3.1194531 | -1.2538093 | 2.4966433  |
| H  | -3.8343371 | -2.0895541 | 2.4754000  |
| N  | -5.0946098 | 0.0000000  | 2.3785733  |
| N  | 5.0946098  | -0.0000000 | 2.3785733  |
| O  | -5.7962141 | -1.0682083 | 2.3412148  |
| O  | -5.7962141 | 1.0682083  | 2.3412148  |
| O  | 5.7962141  | -1.0682083 | 2.3412148  |
| O  | 5.7962141  | 1.0682083  | 2.3412148  |
| S  | 1.5475115  | 1.6826528  | 2.5691856  |
| S  | 1.5475115  | -1.6826528 | 2.5691856  |
| S  | -1.5475115 | -1.6826528 | 2.5691856  |
| S  | -1.5475115 | 1.6826528  | 2.5691856  |
| Pd | 0.0000000  | 0.0000000  | 2.5821335  |
| I  | 0.0000000  | 0.0000000  | -0.8905485 |
| C  | 0.0000000  | 0.0000000  | -2.9762134 |
| C  | -0.0000000 | 1.1924782  | -3.6830479 |
| C  | -0.0000000 | -1.1924782 | -3.6830479 |
| C  | 0.0000000  | 1.2004236  | -5.0684167 |
| F  | 0.0000000  | 2.3559875  | -3.0487716 |
| C  | 0.0000000  | -1.2004236 | -5.0684167 |
| F  | 0.0000000  | -2.3559875 | -3.0487716 |
| C  | -0.0000000 | 0.0000000  | -5.7608974 |
| F  | 0.0000000  | 2.3437854  | -5.7342120 |
| F  | 0.0000000  | -2.3437854 | -5.7342120 |
| F  | 0.0000000  | 0.0000000  | -7.0811801 |

**12A:C<sub>6</sub>F<sub>5</sub>I**

|   |            |            |           |
|---|------------|------------|-----------|
| C | 2.5927201  | -1.2180465 | 2.5005043 |
| H | 3.2120892  | -2.1240421 | 2.4821370 |
| C | 3.2647494  | 0.0000000  | 2.4264882 |
| C | 2.5927201  | 1.2180465  | 2.5005043 |
| H | 3.2120892  | 2.1240421  | 2.4821370 |
| O | 1.3526683  | -1.4417748 | 2.5930659 |
| O | 1.3526683  | 1.4417748  | 2.5930659 |
| C | -2.5927201 | 1.2180465  | 2.5005043 |

|    |            |            |            |
|----|------------|------------|------------|
| H  | -3.2120892 | 2.1240421  | 2.4821370  |
| C  | -3.2647494 | 0.0000000  | 2.4264882  |
| C  | -2.5927201 | -1.2180465 | 2.5005043  |
| H  | -3.2120892 | -2.1240421 | 2.4821370  |
| O  | -1.3526683 | 1.4417748  | 2.5930659  |
| O  | -1.3526683 | -1.4417748 | 2.5930659  |
| N  | -4.6907486 | -0.0000000 | 2.3902313  |
| N  | 4.6907486  | -0.0000000 | 2.3902313  |
| H  | -5.0472008 | 0.8130904  | 1.9070055  |
| H  | -5.0472008 | -0.8130904 | 1.9070055  |
| H  | 5.0472008  | 0.8130904  | 1.9070055  |
| H  | 5.0472008  | -0.8130904 | 1.9070055  |
| Pd | -0.0000000 | 0.0000000  | 2.6045948  |
| I  | 0.0000000  | 0.0000000  | -0.7560857 |
| C  | 0.0000000  | 0.0000000  | -2.8366081 |
| C  | -0.0000000 | 1.1910259  | -3.5479969 |
| C  | -0.0000000 | -1.1910259 | -3.5479969 |
| C  | -0.0000000 | 1.1991689  | -4.9335430 |
| F  | -0.0000000 | 2.3570338  | -2.9185451 |
| C  | -0.0000000 | -1.1991689 | -4.9335430 |
| F  | 0.0000000  | -2.3570338 | -2.9185451 |
| C  | 0.0000000  | 0.0000000  | -5.6271097 |
| F  | -0.0000000 | 2.3437273  | -5.5999860 |
| F  | 0.0000000  | -2.3437273 | -5.5999860 |
| F  | 0.0000000  | 0.0000000  | -6.9489389 |

**12B:C<sub>6</sub>F<sub>5</sub>I**

|   |            |            |           |
|---|------------|------------|-----------|
| C | 3.1163823  | -1.2313661 | 2.5299218 |
| H | 3.7799110  | -2.0962842 | 2.5147132 |
| C | 3.7557660  | -0.0000000 | 2.4606950 |
| C | 3.1163823  | 1.2313661  | 2.5299218 |
| H | 3.7799110  | 2.0962842  | 2.5147132 |
| C | -3.1163823 | 1.2313661  | 2.5299218 |
| H | -3.7799110 | 2.0962842  | 2.5147132 |
| C | -3.7557660 | 0.0000000  | 2.4606950 |

|    |            |            |            |
|----|------------|------------|------------|
| C  | -3.1163823 | -1.2313661 | 2.5299218  |
| H  | -3.7799110 | -2.0962842 | 2.5147132  |
| N  | -5.1675326 | 0.0000000  | 2.4108024  |
| N  | 5.1675326  | -0.0000000 | 2.4108024  |
| H  | -5.5491929 | 0.8232082  | 1.9698568  |
| H  | -5.5491929 | -0.8232082 | 1.9698568  |
| H  | 5.5491929  | 0.8232082  | 1.9698568  |
| H  | 5.5491929  | -0.8232082 | 1.9698568  |
| S  | 1.5273010  | 1.7047039  | 2.6456850  |
| S  | 1.5273010  | -1.7047039 | 2.6456850  |
| S  | -1.5273010 | 1.7047039  | 2.6456850  |
| S  | -1.5273010 | -1.7047039 | 2.6456850  |
| Pd | 0.0000000  | 0.0000000  | 2.6526816  |
| I  | 0.0000000  | 0.0000000  | -0.8277667 |
| C  | 0.0000000  | 0.0000000  | -2.9081790 |
| C  | -0.0000000 | 1.1905489  | -3.6203188 |
| C  | -0.0000000 | -1.1905489 | -3.6203188 |
| C  | 0.0000000  | 1.1989618  | -5.0057946 |
| F  | 0.0000000  | 2.3570647  | -2.9912934 |
| C  | 0.0000000  | -1.1989618 | -5.0057946 |
| F  | 0.0000000  | -2.3570647 | -2.9912934 |
| C  | -0.0000000 | 0.0000000  | -5.6996146 |
| F  | 0.0000000  | 2.3440717  | -5.6720678 |
| F  | 0.0000000  | -2.3440717 | -5.6720678 |
| F  | 0.0000000  | 0.0000000  | -7.0218742 |

**13A:C<sub>6</sub>F<sub>5</sub>I**

|   |            |            |           |
|---|------------|------------|-----------|
| C | 2.6081207  | -1.2145358 | 1.7504963 |
| H | 3.1942859  | -2.1348577 | 1.7476156 |
| C | 3.3007192  | -0.0000000 | 1.6497360 |
| C | 2.6081207  | 1.2145358  | 1.7504963 |
| H | 3.1942859  | 2.1348577  | 1.7476156 |
| O | 1.3646066  | -1.4212068 | 1.8526200 |
| O | 1.3646066  | 1.4212068  | 1.8526200 |
| C | -2.6081207 | 1.2145358  | 1.7504963 |

|    |            |            |            |
|----|------------|------------|------------|
| H  | -3.1942859 | 2.1348577  | 1.7476156  |
| C  | -3.3007192 | -0.0000000 | 1.6497360  |
| C  | -2.6081207 | -1.2145358 | 1.7504963  |
| H  | -3.1942859 | -2.1348577 | 1.7476156  |
| O  | -1.3646066 | 1.4212068  | 1.8526200  |
| O  | -1.3646066 | -1.4212068 | 1.8526200  |
| N  | -4.7082083 | 0.0000000  | 1.4435793  |
| N  | 4.7082083  | 0.0000000  | 1.4435793  |
| C  | -5.4068735 | -1.2084481 | 1.8073318  |
| H  | -5.2419602 | -1.5161058 | 2.8541501  |
| H  | -6.4754986 | -1.0509411 | 1.6641215  |
| H  | -5.1219206 | -2.0408354 | 1.1588707  |
| C  | -5.4068735 | 1.2084481  | 1.8073318  |
| H  | -5.1219206 | 2.0408354  | 1.1588707  |
| H  | -6.4754986 | 1.0509411  | 1.6641215  |
| H  | -5.2419602 | 1.5161058  | 2.8541501  |
| C  | 5.4068735  | 1.2084481  | 1.8073318  |
| H  | 5.2419602  | 1.5161058  | 2.8541501  |
| H  | 6.4754986  | 1.0509411  | 1.6641215  |
| H  | 5.1219206  | 2.0408354  | 1.1588707  |
| C  | 5.4068735  | -1.2084481 | 1.8073318  |
| H  | 5.1219206  | -2.0408354 | 1.1588707  |
| H  | 6.4754986  | -1.0509411 | 1.6641215  |
| H  | 5.2419602  | -1.5161058 | 2.8541501  |
| Pd | 0.0000000  | 0.0000000  | 1.8525048  |
| I  | 0.0000000  | 0.0000000  | -1.5235524 |
| C  | 0.0000000  | 0.0000000  | -3.6036089 |
| C  | 0.0000000  | 1.1907450  | -4.3154589 |
| C  | 0.0000000  | -1.1907450 | -4.3154589 |
| C  | -0.0000000 | 1.1988073  | -5.7009552 |
| F  | -0.0000000 | 2.3571143  | -3.6867151 |
| C  | -0.0000000 | -1.1988073 | -5.7009552 |
| F  | -0.0000000 | -2.3571143 | -3.6867151 |
| C  | 0.0000000  | 0.0000000  | -6.3947177 |
| F  | 0.0000000  | 2.3436457  | -6.3674508 |

|   |           |            |            |
|---|-----------|------------|------------|
| F | 0.0000000 | -2.3436457 | -6.3674508 |
| F | 0.0000000 | 0.0000000  | -7.7169204 |

**13B:C<sub>6</sub>F<sub>5</sub>I**

|   |            |            |            |
|---|------------|------------|------------|
| C | 3.1216763  | -1.2232161 | -1.9243021 |
| H | 3.7544394  | -2.1037175 | -1.9118124 |
| C | 3.7650320  | 0.0000000  | -1.7189861 |
| C | 3.1216763  | 1.2232161  | -1.9243021 |
| H | 3.7544394  | 2.1037175  | -1.9118124 |
| C | -3.1216763 | 1.2232161  | -1.9243021 |
| H | -3.7544394 | 2.1037175  | -1.9118124 |
| C | -3.7650320 | 0.0000000  | -1.7189861 |
| C | -3.1216763 | -1.2232161 | -1.9243021 |
| H | -3.7544394 | -2.1037175 | -1.9118124 |
| N | -5.1190412 | 0.0000000  | -1.3445046 |
| N | 5.1190412  | 0.0000000  | -1.3445046 |
| C | -5.8720475 | 1.2210742  | -1.4787534 |
| H | -5.9148027 | 1.6001074  | -2.5123766 |
| H | -6.8926822 | 1.0415353  | -1.1435593 |
| H | -5.4637656 | 2.0104863  | -0.8413017 |
| C | -5.8720475 | -1.2210742 | -1.4787534 |
| H | -5.4637656 | -2.0104863 | -0.8413017 |
| H | -6.8926822 | -1.0415353 | -1.1435593 |
| H | -5.9148027 | -1.6001074 | -2.5123766 |
| C | 5.8720475  | -1.2210742 | -1.4787534 |
| H | 5.9148027  | -1.6001074 | -2.5123766 |
| H | 6.8926822  | -1.0415353 | -1.1435593 |
| H | 5.4637656  | -2.0104863 | -0.8413017 |
| C | 5.8720475  | 1.2210742  | -1.4787534 |
| H | 5.4637656  | 2.0104863  | -0.8413017 |
| H | 6.8926822  | 1.0415353  | -1.1435593 |
| H | 5.9148027  | 1.6001074  | -2.5123766 |
| S | -1.5464910 | -1.6793465 | -2.2074273 |
| S | -1.5464910 | 1.6793465  | -2.2074273 |
| S | 1.5464910  | -1.6793465 | -2.2074273 |

|    |            |            |            |
|----|------------|------------|------------|
| S  | 1.5464910  | 1.6793465  | -2.2074273 |
| Pd | 0.0000000  | 0.0000000  | -2.1856608 |
| I  | 0.0000000  | 0.0000000  | 1.2717260  |
| C  | 0.0000000  | 0.0000000  | 3.3535653  |
| C  | 0.0000000  | -1.1902183 | 4.0664147  |
| C  | 0.0000000  | 1.1902183  | 4.0664147  |
| C  | -0.0000000 | -1.1986933 | 5.4519272  |
| F  | -0.0000000 | -2.3574181 | 3.4383442  |
| C  | -0.0000000 | 1.1986933  | 5.4519272  |
| F  | 0.0000000  | 2.3574181  | 3.4383442  |
| C  | 0.0000000  | 0.0000000  | 6.1458413  |
| F  | 0.0000000  | -2.3438364 | 6.1188792  |
| F  | 0.0000000  | 2.3438364  | 6.1188792  |
| F  | 0.0000000  | 0.0000000  | 7.4685103  |

**14A: C<sub>6</sub>F<sub>5</sub>I**

|   |            |            |            |
|---|------------|------------|------------|
| C | 2.5982749  | -1.2112020 | 1.6102028  |
| H | 3.1918625  | -2.1288385 | 1.5929959  |
| C | 3.2874739  | 0.0000000  | 1.5159874  |
| C | 2.5982749  | 1.2112020  | 1.6102028  |
| H | 3.1918625  | 2.1288385  | 1.5929959  |
| O | 1.3606077  | -1.4306970 | 1.7221995  |
| O | 1.3606077  | 1.4306970  | 1.7221995  |
| C | -2.5982749 | 1.2112020  | 1.6102028  |
| H | -3.1918625 | 2.1288385  | 1.5929959  |
| C | -3.2874739 | 0.0000000  | 1.5159874  |
| C | -2.5982749 | -1.2112020 | 1.6102028  |
| H | -3.1918625 | -2.1288385 | 1.5929959  |
| O | -1.3606077 | 1.4306970  | 1.7221995  |
| O | -1.3606077 | -1.4306970 | 1.7221995  |
| C | -4.8186075 | -0.0000000 | 1.4153138  |
| C | 4.8186075  | 0.0000000  | 1.4153138  |
| C | -5.3269972 | -1.2309286 | 0.6576391  |
| H | -5.1596248 | -2.1614210 | 1.2037541  |
| H | -6.4055829 | -1.1461018 | 0.5058855  |
| H | -4.8519350 | -1.3177083 | -0.3227486 |

|    |            |            |            |
|----|------------|------------|------------|
| C  | -5.3269972 | 1.2309286  | 0.6576391  |
| H  | -6.4055829 | 1.1461018  | 0.5058855  |
| H  | -5.1596248 | 2.1614210  | 1.2037541  |
| H  | -4.8519350 | 1.3177083  | -0.3227486 |
| C  | -5.4223241 | 0.0000000  | 2.8236376  |
| H  | -6.5153309 | 0.0000000  | 2.7811085  |
| H  | -5.1034911 | -0.8826080 | 3.3841088  |
| H  | -5.1034911 | 0.8826080  | 3.3841088  |
| C  | 5.4223241  | 0.0000000  | 2.8236376  |
| H  | 5.1034911  | -0.8826080 | 3.3841088  |
| H  | 6.5153309  | 0.0000000  | 2.7811085  |
| H  | 5.1034911  | 0.8826080  | 3.3841088  |
| C  | 5.3269972  | -1.2309286 | 0.6576391  |
| H  | 6.4055829  | -1.1461018 | 0.5058855  |
| H  | 5.1596248  | -2.1614210 | 1.2037541  |
| H  | 4.8519350  | -1.3177083 | -0.3227486 |
| C  | 5.3269972  | 1.2309286  | 0.6576391  |
| H  | 4.8519350  | 1.3177083  | -0.3227486 |
| H  | 5.1596248  | 2.1614210  | 1.2037541  |
| H  | 6.4055829  | 1.1461018  | 0.5058855  |
| Pd | 0.0000000  | 0.0000000  | 1.7311828  |
| I  | 0.0000000  | 0.0000000  | -1.5929447 |
| C  | 0.0000000  | 0.0000000  | -3.6740121 |
| C  | 0.0000000  | 1.1908827  | -4.3855713 |
| C  | 0.0000000  | -1.1908827 | -4.3855713 |
| C  | 0.0000000  | 1.1990286  | -5.7710586 |
| F  | 0.0000000  | 2.3571051  | -3.7563186 |
| C  | 0.0000000  | -1.1990286 | -5.7710586 |
| F  | 0.0000000  | -2.3571051 | -3.7563186 |
| C  | 0.0000000  | 0.0000000  | -6.4646787 |
| F  | -0.0000000 | 2.3437466  | -6.4376280 |
| F  | -0.0000000 | -2.3437466 | -6.4376280 |
| F  | 0.0000000  | 0.0000000  | -7.7866368 |

**14B:C<sub>6</sub>F<sub>5</sub>I**

|   |            |            |            |
|---|------------|------------|------------|
| C | 3.1177866  | -1.2211162 | -1.6912357 |
| H | 3.7557010  | -2.0995733 | -1.6575365 |
| C | 3.7664294  | 0.0000000  | -1.5551453 |
| C | 3.1177866  | 1.2211162  | -1.6912357 |
| H | 3.7557010  | 2.0995733  | -1.6575365 |
| C | -3.1177866 | 1.2211162  | -1.6912357 |
| H | -3.7557010 | 2.0995733  | -1.6575365 |
| C | -3.7664294 | 0.0000000  | -1.5551453 |
| C | -3.1177866 | -1.2211162 | -1.6912357 |
| H | -3.7557010 | -2.0995733 | -1.6575365 |
| C | -5.2961575 | 0.0000000  | -1.3608207 |
| C | 5.2961575  | 0.0000000  | -1.3608207 |
| C | -5.7617893 | 1.2311071  | -0.5772287 |
| H | -5.6419093 | 2.1602941  | -1.1377355 |
| H | -6.8268632 | 1.1380374  | -0.3538887 |
| H | -5.2239464 | 1.3281649  | 0.3690416  |
| C | -5.7617893 | -1.2311071 | -0.5772287 |
| H | -6.8268632 | -1.1380374 | -0.3538887 |
| H | -5.6419093 | -2.1602941 | -1.1377355 |
| H | -5.2239464 | -1.3281649 | 0.3690416  |
| C | -5.9662240 | 0.0000000  | -2.7383782 |
| H | -7.0552000 | 0.0000000  | -2.6382121 |
| H | -5.6766118 | 0.8829346  | -3.3137933 |
| H | -5.6766118 | -0.8829346 | -3.3137933 |
| C | 5.9662240  | 0.0000000  | -2.7383782 |
| H | 5.6766118  | 0.8829346  | -3.3137933 |
| H | 7.0552000  | 0.0000000  | -2.6382121 |
| H | 5.6766118  | -0.8829346 | -3.3137933 |
| C | 5.7617893  | 1.2311071  | -0.5772287 |
| H | 6.8268632  | 1.1380374  | -0.3538887 |
| H | 5.6419093  | 2.1602941  | -1.1377355 |
| H | 5.2239464  | 1.3281649  | 0.3690416  |
| C | 5.7617893  | -1.2311071 | -0.5772287 |
| H | 5.2239464  | -1.3281649 | 0.3690416  |
| H | 5.6419093  | -2.1602941 | -1.1377355 |



|    |            |            |            |
|----|------------|------------|------------|
| H  | 6.8268632  | -1.1380374 | -0.3538887 |
| S  | -1.5391485 | 1.6926145  | -1.9130475 |
| S  | -1.5391485 | -1.6926145 | -1.9130475 |
| S  | 1.5391485  | -1.6926145 | -1.9130475 |
| S  | 1.5391485  | 1.6926145  | -1.9130475 |
| Pd | 0.0000000  | 0.0000000  | -1.9187611 |
| I  | 0.0000000  | 0.0000000  | 1.5422222  |
| C  | 0.0000000  | 0.0000000  | 3.6223682  |
| C  | -0.0000000 | -1.1906538 | 4.3343672  |
| C  | -0.0000000 | 1.1906538  | 4.3343672  |
| C  | 0.0000000  | -1.1990035 | 5.7198213  |
| F  | -0.0000000 | -2.3571044 | 3.7052656  |
| C  | 0.0000000  | 1.1990035  | 5.7198213  |
| F  | -0.0000000 | 2.3571044  | 3.7052656  |
| C  | 0.0000000  | 0.0000000  | 6.4135131  |
| F  | 0.0000000  | -2.3439505 | 6.3863794  |
| F  | 0.0000000  | 2.3439505  | 6.3863794  |
| F  | 0.0000000  | 0.0000000  | 7.7358003  |

**15A:C<sub>6</sub>F<sub>5</sub>I**

|   |            |            |           |
|---|------------|------------|-----------|
| C | -2.5783735 | 1.2319438  | 2.7740111 |
| H | -3.2000842 | 2.1318221  | 2.7599454 |
| C | -3.2218161 | -0.0000000 | 2.7438199 |
| H | -4.3023607 | 0.0000000  | 2.7027076 |
| C | -2.5783735 | -1.2319438 | 2.7740111 |
| H | -3.2000842 | -2.1318221 | 2.7599454 |
| O | -1.3377714 | 1.4668291  | 2.8194615 |
| O | -1.3377714 | -1.4668291 | 2.8194615 |
| C | 2.5783735  | -1.2319438 | 2.7740111 |
| H | 3.2000842  | -2.1318221 | 2.7599454 |
| C | 3.2218161  | 0.0000000  | 2.7438199 |
| H | 4.3023607  | 0.0000000  | 2.7027076 |
| C | 2.5783735  | 1.2319438  | 2.7740111 |
| H | 3.2000842  | 2.1318221  | 2.7599454 |
| O | 1.3377714  | -1.4668291 | 2.8194615 |

|    |            |            |            |
|----|------------|------------|------------|
| O  | 1.3377714  | 1.4668291  | 2.8194615  |
| Pt | 0.0000000  | 0.0000000  | 2.8213419  |
| I  | 0.0000000  | 0.0000000  | -0.4969235 |
| C  | 0.0000000  | 0.0000000  | -2.5833132 |
| C  | 0.0000000  | -1.1903034 | -3.2950791 |
| C  | 0.0000000  | 1.1903034  | -3.2950791 |
| C  | -0.0000000 | -1.1991257 | -4.6805441 |
| F  | -0.0000000 | -2.3570367 | -2.6657173 |
| C  | -0.0000000 | 1.1991257  | -4.6805441 |
| F  | -0.0000000 | 2.3570367  | -2.6657173 |
| C  | 0.0000000  | 0.0000000  | -5.3740636 |
| F  | 0.0000000  | -2.3439308 | -5.3473535 |
| F  | 0.0000000  | 2.3439308  | -5.3473535 |
| F  | 0.0000000  | 0.0000000  | -6.6963808 |

**15B:C<sub>6</sub>F<sub>5</sub>I**

|    |            |            |            |
|----|------------|------------|------------|
| C  | -3.0938258 | 1.2448219  | 2.8411328  |
| H  | -3.7681642 | 2.0985713  | 2.8203415  |
| C  | -3.6976846 | -0.0000000 | 2.8062116  |
| H  | -4.7813112 | 0.0000000  | 2.7548974  |
| C  | -3.0938258 | -1.2448219 | 2.8411328  |
| H  | -3.7681642 | -2.0985713 | 2.8203415  |
| C  | 3.0938258  | -1.2448219 | 2.8411328  |
| H  | 3.7681642  | -2.0985713 | 2.8203415  |
| C  | 3.6976846  | 0.0000000  | 2.8062116  |
| H  | 4.7813112  | 0.0000000  | 2.7548974  |
| C  | 3.0938258  | 1.2448219  | 2.8411328  |
| H  | 3.7681642  | 2.0985713  | 2.8203415  |
| Pt | 0.0000000  | 0.0000000  | 2.9199078  |
| S  | -1.5081416 | -1.7305136 | 2.9125663  |
| S  | -1.5081416 | 1.7305136  | 2.9125663  |
| S  | 1.5081416  | -1.7305136 | 2.9125663  |
| S  | 1.5081416  | 1.7305136  | 2.9125663  |
| I  | 0.0000000  | 0.0000000  | -0.6034129 |
| C  | 0.0000000  | 0.0000000  | -2.6836134 |
| C  | -0.0000000 | -1.1906752 | -3.3954882 |

|   |            |            |            |
|---|------------|------------|------------|
| C | -0.0000000 | 1.1906752  | -3.3954882 |
| C | 0.0000000  | -1.1990550 | -4.7809439 |
| F | 0.0000000  | -2.3570317 | -2.7661399 |
| C | 0.0000000  | 1.1990550  | -4.7809439 |
| F | 0.0000000  | 2.3570317  | -2.7661399 |
| C | 0.0000000  | 0.0000000  | -5.4746294 |
| F | 0.0000000  | -2.3440049 | -5.4473409 |
| F | 0.0000000  | 2.3440049  | -5.4473409 |
| F | 0.0000000  | 0.0000000  | -6.7968069 |

**16A:C<sub>6</sub>F<sub>5</sub>I**

|    |            |            |            |
|----|------------|------------|------------|
| C  | 2.5780191  | -1.2394351 | 2.7930575  |
| H  | 3.2269467  | -2.1189656 | 2.7781754  |
| C  | 3.1994118  | 0.0000000  | 2.7656919  |
| C  | 2.5780191  | 1.2394351  | 2.7930575  |
| H  | 3.2269467  | 2.1189656  | 2.7781754  |
| O  | 1.3354002  | -1.4683257 | 2.8359000  |
| O  | 1.3354002  | 1.4683257  | 2.8359000  |
| C  | -2.5780191 | 1.2394351  | 2.7930575  |
| H  | -3.2269467 | 2.1189656  | 2.7781754  |
| C  | -3.1994118 | 0.0000000  | 2.7656919  |
| C  | -2.5780191 | -1.2394351 | 2.7930575  |
| H  | -3.2269467 | -2.1189656 | 2.7781754  |
| O  | -1.3354002 | 1.4683257  | 2.8359000  |
| O  | -1.3354002 | -1.4683257 | 2.8359000  |
| F  | 4.5493354  | 0.0000000  | 2.7182382  |
| F  | -4.5493354 | 0.0000000  | 2.7182382  |
| Pt | 0.0000000  | 0.0000000  | 2.8386014  |
| I  | 0.0000000  | 0.0000000  | -0.5269061 |
| C  | 0.0000000  | 0.0000000  | -2.6098637 |
| C  | 0.0000000  | 1.1910130  | -3.3205685 |
| C  | 0.0000000  | -1.1910130 | -3.3205685 |
| C  | -0.0000000 | 1.1993484  | -4.7059928 |
| F  | -0.0000000 | 2.3569317  | -2.6905887 |
| C  | -0.0000000 | -1.1993484 | -4.7059928 |

|   |            |            |            |
|---|------------|------------|------------|
| F | 0.0000000  | -2.3569317 | -2.6905887 |
| C | 0.0000000  | 0.0000000  | -5.3994800 |
| F | 0.0000000  | 2.3441512  | -5.3716753 |
| F | 0.0000000  | -2.3441512 | -5.3716753 |
| F | -0.0000000 | 0.0000000  | -6.7210930 |

**16B:C<sub>6</sub>F<sub>5</sub>I**

|    |            |            |            |
|----|------------|------------|------------|
| C  | 3.0877007  | -1.2496097 | 2.8508301  |
| H  | 3.7921793  | -2.0780756 | 2.8297604  |
| C  | 3.6669582  | -0.0000000 | 2.8166884  |
| C  | 3.0877007  | 1.2496097  | 2.8508301  |
| H  | 3.7921793  | 2.0780756  | 2.8297604  |
| C  | -3.0877007 | 1.2496097  | 2.8508301  |
| H  | -3.7921793 | 2.0780756  | 2.8297604  |
| C  | -3.6669582 | 0.0000000  | 2.8166884  |
| C  | -3.0877007 | -1.2496097 | 2.8508301  |
| H  | -3.7921793 | -2.0780756 | 2.8297604  |
| F  | 5.0184917  | -0.0000000 | 2.7514432  |
| F  | -5.0184917 | 0.0000000  | 2.7514432  |
| Pt | 0.0000000  | 0.0000000  | 2.9283820  |
| S  | 1.5021925  | 1.7337821  | 2.9209304  |
| S  | 1.5021925  | -1.7337821 | 2.9209304  |
| S  | -1.5021925 | 1.7337821  | 2.9209304  |
| S  | -1.5021925 | -1.7337821 | 2.9209304  |
| I  | 0.0000000  | 0.0000000  | -0.6169340 |
| C  | 0.0000000  | 0.0000000  | -2.6956892 |
| C  | 0.0000000  | 1.1912006  | -3.4065392 |
| C  | 0.0000000  | -1.1912006 | -3.4065392 |
| C  | 0.0000000  | 1.1993236  | -4.7919541 |
| F  | -0.0000000 | 2.3567719  | -2.7762686 |
| C  | 0.0000000  | -1.1993236 | -4.7919541 |
| F  | 0.0000000  | -2.3567719 | -2.7762686 |
| C  | 0.0000000  | 0.0000000  | -5.4853809 |
| F  | -0.0000000 | 2.3438446  | -5.4580883 |
| F  | 0.0000000  | -2.3438446 | -5.4580883 |

|   |            |           |            |
|---|------------|-----------|------------|
| F | -0.0000000 | 0.0000000 | -6.8070245 |
|---|------------|-----------|------------|

**17A:C<sub>6</sub>F<sub>5</sub>I**

|    |            |            |            |
|----|------------|------------|------------|
| C  | -2.5803457 | 1.2428024  | 2.6434172  |
| H  | -3.2050689 | 2.1396127  | 2.6266679  |
| C  | -3.2340544 | -0.0000000 | 2.6094708  |
| C  | -2.5803457 | -1.2428024 | 2.6434172  |
| H  | -3.2050689 | -2.1396127 | 2.6266679  |
| O  | -1.3446615 | 1.4574507  | 2.6943829  |
| O  | -1.3446615 | -1.4574507 | 2.6943829  |
| C  | 2.5803457  | -1.2428024 | 2.6434172  |
| H  | 3.2050689  | -2.1396127 | 2.6266679  |
| C  | 3.2340544  | 0.0000000  | 2.6094708  |
| C  | 2.5803457  | 1.2428024  | 2.6434172  |
| H  | 3.2050689  | 2.1396127  | 2.6266679  |
| O  | 1.3446615  | -1.4574507 | 2.6943829  |
| O  | 1.3446615  | 1.4574507  | 2.6943829  |
| Pt | 0.0000000  | 0.0000000  | 2.7000150  |
| C  | 4.6556852  | 0.0000000  | 2.5497750  |
| C  | -4.6556852 | 0.0000000  | 2.5497750  |
| N  | 5.8068954  | 0.0000000  | 2.5024809  |
| N  | -5.8068954 | -0.0000000 | 2.5024809  |
| I  | 0.0000000  | 0.0000000  | -0.7373144 |
| C  | 0.0000000  | 0.0000000  | -2.8159541 |
| C  | -0.0000000 | -1.1924707 | -3.5242692 |
| C  | -0.0000000 | 1.1924707  | -3.5242692 |
| C  | 0.0000000  | -1.2000767 | -4.9096793 |
| F  | -0.0000000 | -2.3564187 | -2.8918788 |
| C  | 0.0000000  | 1.2000767  | -4.9096793 |
| F  | 0.0000000  | 2.3564187  | -2.8918788 |
| C  | -0.0000000 | 0.0000000  | -5.6023849 |
| F  | 0.0000000  | -2.3435865 | -5.5755801 |
| F  | 0.0000000  | 2.3435865  | -5.5755801 |
| F  | -0.0000000 | 0.0000000  | -6.9228723 |

**17B:C<sub>6</sub>F5<sub>I</sub>**

|    |            |            |            |
|----|------------|------------|------------|
| C  | 3.0888922  | -1.2528379 | 2.6850864  |
| H  | 3.7661444  | -2.1039768 | 2.6648971  |
| C  | 3.7033889  | 0.0000000  | 2.6504161  |
| C  | 3.0888922  | 1.2528379  | 2.6850864  |
| H  | 3.7661444  | 2.1039768  | 2.6648971  |
| C  | -3.0888922 | 1.2528379  | 2.6850864  |
| H  | -3.7661444 | 2.1039768  | 2.6648971  |
| C  | -3.7033889 | 0.0000000  | 2.6504161  |
| C  | -3.0888922 | -1.2528379 | 2.6850864  |
| H  | -3.7661444 | -2.1039768 | 2.6648971  |
| Pt | 0.0000000  | 0.0000000  | 2.7636807  |
| S  | 1.5085799  | 1.7256742  | 2.7540626  |
| S  | 1.5085799  | -1.7256742 | 2.7540626  |
| S  | -1.5085799 | -1.7256742 | 2.7540626  |
| S  | -1.5085799 | 1.7256742  | 2.7540626  |
| C  | -5.1319088 | 0.0000000  | 2.5836649  |
| C  | 5.1319088  | -0.0000000 | 2.5836649  |
| N  | -6.2827637 | 0.0000000  | 2.5302745  |
| N  | 6.2827637  | 0.0000000  | 2.5302745  |
| I  | 0.0000000  | 0.0000000  | -0.8074474 |
| C  | 0.0000000  | 0.0000000  | -2.8840578 |
| C  | 0.0000000  | -1.1921829 | -3.5930835 |
| C  | 0.0000000  | 1.1921829  | -3.5930835 |
| C  | 0.0000000  | -1.1998539 | -4.9784583 |
| F  | 0.0000000  | -2.3564642 | -2.9611454 |
| C  | 0.0000000  | 1.1998539  | -4.9784583 |
| F  | 0.0000000  | 2.3564642  | -2.9611454 |
| C  | 0.0000000  | 0.0000000  | -5.6714515 |
| F  | 0.0000000  | -2.3437287 | -5.6440531 |
| F  | 0.0000000  | 2.3437287  | -5.6440531 |
| F  | 0.0000000  | 0.0000000  | -6.9921389 |

**18A:C<sub>6</sub>F5<sub>I</sub>**

|   |           |            |           |
|---|-----------|------------|-----------|
| C | 2.5836451 | -1.2461928 | 2.4918946 |
|---|-----------|------------|-----------|

|    |            |            |            |
|----|------------|------------|------------|
| H  | 3.2193446  | -2.1320284 | 2.4767665  |
| C  | 3.2196634  | 0.0000000  | 2.4624528  |
| C  | 2.5836451  | 1.2461928  | 2.4918946  |
| H  | 3.2193446  | 2.1320284  | 2.4767665  |
| O  | 1.3465462  | -1.4552257 | 2.5366782  |
| O  | 1.3465462  | 1.4552257  | 2.5366782  |
| C  | -2.5836451 | 1.2461928  | 2.4918946  |
| H  | -3.2193446 | 2.1320284  | 2.4767665  |
| C  | -3.2196634 | 0.0000000  | 2.4624528  |
| C  | -2.5836451 | -1.2461928 | 2.4918946  |
| H  | -3.2193446 | -2.1320284 | 2.4767665  |
| O  | -1.3465462 | 1.4552257  | 2.5366782  |
| O  | -1.3465462 | -1.4552257 | 2.5366782  |
| N  | -4.6705929 | 0.0000000  | 2.4076280  |
| N  | 4.6705929  | -0.0000000 | 2.4076280  |
| O  | -5.2341881 | -1.0746837 | 2.3862086  |
| O  | -5.2341881 | 1.0746837  | 2.3862086  |
| O  | 5.2341881  | -1.0746837 | 2.3862086  |
| O  | 5.2341881  | 1.0746837  | 2.3862086  |
| Pt | 0.0000000  | 0.0000000  | 2.5414128  |
| I  | 0.0000000  | 0.0000000  | -0.9016221 |
| C  | 0.0000000  | 0.0000000  | -2.9799440 |
| C  | -0.0000000 | 1.1925081  | -3.6881441 |
| C  | -0.0000000 | -1.1925081 | -3.6881441 |
| C  | 0.0000000  | 1.2000580  | -5.0735299 |
| F  | 0.0000000  | 2.3563660  | -3.0558860 |
| C  | 0.0000000  | -1.2000580 | -5.0735299 |
| F  | -0.0000000 | -2.3563660 | -3.0558860 |
| C  | 0.0000000  | 0.0000000  | -5.7662987 |
| F  | 0.0000000  | 2.3436827  | -5.7390428 |
| F  | 0.0000000  | -2.3436827 | -5.7390428 |
| F  | 0.0000000  | 0.0000000  | -7.0866954 |

**18B:C<sub>6</sub>F<sub>5</sub>I**

|   |           |            |           |
|---|-----------|------------|-----------|
| C | 3.0815352 | -1.2627498 | 2.5237612 |
|---|-----------|------------|-----------|

|    |            |            |            |
|----|------------|------------|------------|
| H  | 3.7886652  | -2.0999343 | 2.5094837  |
| C  | 3.7005791  | 0.0000000  | 2.4887986  |
| C  | 3.0815352  | 1.2627498  | 2.5237612  |
| H  | 3.7886652  | 2.0999343  | 2.5094837  |
| C  | -3.0815352 | 1.2627498  | 2.5237612  |
| H  | -3.7886652 | 2.0999343  | 2.5094837  |
| C  | -3.7005791 | 0.0000000  | 2.4887986  |
| C  | -3.0815352 | -1.2627498 | 2.5237612  |
| H  | -3.7886652 | -2.0999343 | 2.5094837  |
| N  | -5.0435107 | -0.0000000 | 2.4277451  |
| N  | 5.0435107  | 0.0000000  | 2.4277451  |
| O  | -5.7762654 | -1.0531601 | 2.3970515  |
| O  | -5.7762654 | 1.0531601  | 2.3970515  |
| O  | 5.7762654  | -1.0531601 | 2.3970515  |
| O  | 5.7762654  | 1.0531601  | 2.3970515  |
| Pt | 0.0000000  | 0.0000000  | 2.5833960  |
| S  | 1.5110736  | 1.7053213  | 2.5829449  |
| S  | 1.5110736  | -1.7053213 | 2.5829449  |
| S  | -1.5110736 | -1.7053213 | 2.5829449  |
| S  | -1.5110736 | 1.7053213  | 2.5829449  |
| I  | 0.0000000  | 0.0000000  | -0.9491427 |
| C  | 0.0000000  | 0.0000000  | -3.0328357 |
| C  | 0.0000000  | 1.1922397  | -3.7405445 |
| C  | 0.0000000  | -1.1922397 | -3.7405445 |
| C  | 0.0000000  | 1.2002551  | -5.1259233 |
| F  | 0.0000000  | 2.3559125  | -3.1065728 |
| C  | 0.0000000  | -1.2002551 | -5.1259233 |
| F  | 0.0000000  | -2.3559125 | -3.1065728 |
| C  | -0.0000000 | 0.0000000  | -5.8185009 |
| F  | 0.0000000  | 2.3436559  | -5.7919584 |
| F  | 0.0000000  | -2.3436559 | -5.7919584 |
| F  | 0.0000000  | 0.0000000  | -7.1389711 |

**19A:C<sub>6</sub>F<sub>5</sub>I**

|   |           |            |           |
|---|-----------|------------|-----------|
| C | 2.5905767 | -1.2214670 | 2.4777133 |
|---|-----------|------------|-----------|



|    |            |            |            |
|----|------------|------------|------------|
| H  | 3.2075268  | -2.1267495 | 2.4680902  |
| C  | 3.2569591  | 0.0000000  | 2.4180941  |
| C  | 2.5905767  | 1.2214670  | 2.4777133  |
| H  | 3.2075268  | 2.1267495  | 2.4680902  |
| O  | 1.3459387  | -1.4514419 | 2.5485930  |
| O  | 1.3459387  | 1.4514419  | 2.5485930  |
| C  | -2.5905767 | 1.2214670  | 2.4777133  |
| H  | -3.2075268 | 2.1267495  | 2.4680902  |
| C  | -3.2569591 | 0.0000000  | 2.4180941  |
| C  | -2.5905767 | -1.2214670 | 2.4777133  |
| H  | -3.2075268 | -2.1267495 | 2.4680902  |
| O  | -1.3459387 | 1.4514419  | 2.5485930  |
| O  | -1.3459387 | -1.4514419 | 2.5485930  |
| N  | -4.6826245 | 0.0000000  | 2.4071994  |
| N  | 4.6826245  | 0.0000000  | 2.4071994  |
| H  | -5.0496209 | 0.8134989  | 1.9328561  |
| H  | -5.0496209 | -0.8134989 | 1.9328561  |
| H  | 5.0496209  | 0.8134989  | 1.9328561  |
| H  | 5.0496209  | -0.8134989 | 1.9328561  |
| Pt | 0.0000000  | 0.0000000  | 2.5492180  |
| I  | 0.0000000  | 0.0000000  | -0.7246656 |
| C  | 0.0000000  | 0.0000000  | -2.8147921 |
| C  | 0.0000000  | 1.1898220  | -3.5270971 |
| C  | 0.0000000  | -1.1898220 | -3.5270971 |
| C  | -0.0000000 | 1.1990379  | -4.9126043 |
| F  | -0.0000000 | 2.3571325  | -2.8979534 |
| C  | -0.0000000 | -1.1990379 | -4.9126043 |
| F  | -0.0000000 | -2.3571325 | -2.8979534 |
| C  | 0.0000000  | 0.0000000  | -5.6062838 |
| F  | -0.0000000 | 2.3440409  | -5.5795381 |
| F  | -0.0000000 | -2.3440409 | -5.5795381 |
| F  | -0.0000000 | 0.0000000  | -6.9286878 |

**19B:C<sub>6</sub>F<sub>5</sub>I**

|   |           |            |           |
|---|-----------|------------|-----------|
| C | 3.1023297 | -1.2331182 | 2.5434612 |
|---|-----------|------------|-----------|

|    |            |            |            |
|----|------------|------------|------------|
| H  | 3.7653264  | -2.0978203 | 2.5326910  |
| C  | 3.7379620  | 0.0000000  | 2.4740904  |
| C  | 3.1023297  | 1.2331182  | 2.5434612  |
| H  | 3.7653264  | 2.0978203  | 2.5326910  |
| C  | -3.1023297 | 1.2331182  | 2.5434612  |
| H  | -3.7653264 | 2.0978203  | 2.5326910  |
| C  | -3.7379620 | -0.0000000 | 2.4740904  |
| C  | -3.1023297 | -1.2331182 | 2.5434612  |
| H  | -3.7653264 | -2.0978203 | 2.5326910  |
| N  | -5.1498385 | 0.0000000  | 2.4238958  |
| N  | 5.1498385  | 0.0000000  | 2.4238958  |
| H  | -5.5313219 | 0.8231331  | 1.9825872  |
| H  | -5.5313219 | -0.8231331 | 1.9825872  |
| H  | 5.5313219  | 0.8231331  | 1.9825872  |
| H  | 5.5313219  | -0.8231331 | 1.9825872  |
| Pt | 0.0000000  | 0.0000000  | 2.6542914  |
| S  | 1.5155306  | 1.7143407  | 2.6554567  |
| S  | 1.5155306  | -1.7143407 | 2.6554567  |
| S  | -1.5155306 | 1.7143407  | 2.6554567  |
| S  | -1.5155306 | -1.7143407 | 2.6554567  |
| I  | 0.0000000  | 0.0000000  | -0.8479367 |
| C  | 0.0000000  | 0.0000000  | -2.9304510 |
| C  | -0.0000000 | 1.1901897  | -3.6430307 |
| C  | -0.0000000 | -1.1901897 | -3.6430307 |
| C  | 0.0000000  | 1.1988996  | -5.0284992 |
| F  | 0.0000000  | 2.3571089  | -3.0141774 |
| C  | 0.0000000  | -1.1988996 | -5.0284992 |
| F  | 0.0000000  | -2.3571089 | -3.0141774 |
| C  | 0.0000000  | 0.0000000  | -5.7223452 |
| F  | 0.0000000  | 2.3440308  | -5.6950713 |
| F  | 0.0000000  | -2.3440308 | -5.6950713 |
| F  | 0.0000000  | 0.0000000  | -7.0447579 |

**20A:C<sub>6</sub>F<sub>5</sub>I**

|   |           |            |           |
|---|-----------|------------|-----------|
| C | 2.6063395 | -1.2181581 | 1.7237342 |
|---|-----------|------------|-----------|

|    |            |            |            |
|----|------------|------------|------------|
| H  | 3.1903692  | -2.1376551 | 1.7226392  |
| C  | 3.2931840  | 0.0000000  | 1.6351605  |
| C  | 2.6063395  | 1.2181581  | 1.7237342  |
| H  | 3.1903692  | 2.1376551  | 1.7226392  |
| O  | 1.3585708  | -1.4318121 | 1.8102026  |
| O  | 1.3585708  | 1.4318121  | 1.8102026  |
| C  | -2.6063395 | 1.2181581  | 1.7237342  |
| H  | -3.1903692 | 2.1376551  | 1.7226392  |
| C  | -3.2931840 | -0.0000000 | 1.6351605  |
| C  | -2.6063395 | -1.2181581 | 1.7237342  |
| H  | -3.1903692 | -2.1376551 | 1.7226392  |
| O  | -1.3585708 | 1.4318121  | 1.8102026  |
| O  | -1.3585708 | -1.4318121 | 1.8102026  |
| N  | -4.7026694 | 0.0000000  | 1.4499067  |
| N  | 4.7026694  | -0.0000000 | 1.4499067  |
| C  | -5.3969687 | -1.2095031 | 1.8185042  |
| H  | -5.2136810 | -1.5232516 | 2.8603236  |
| H  | -6.4675140 | -1.0492616 | 1.6951084  |
| H  | -5.1254275 | -2.0385533 | 1.1600482  |
| C  | -5.3969687 | 1.2095031  | 1.8185042  |
| H  | -5.1254275 | 2.0385533  | 1.1600482  |
| H  | -6.4675140 | 1.0492616  | 1.6951084  |
| H  | -5.2136810 | 1.5232516  | 2.8603236  |
| C  | 5.3969687  | 1.2095031  | 1.8185042  |
| H  | 5.2136810  | 1.5232516  | 2.8603236  |
| H  | 6.4675140  | 1.0492616  | 1.6951084  |
| H  | 5.1254275  | 2.0385533  | 1.1600482  |
| C  | 5.3969687  | -1.2095031 | 1.8185042  |
| H  | 5.1254275  | -2.0385533 | 1.1600482  |
| H  | 6.4675140  | -1.0492616 | 1.6951084  |
| H  | 5.2136810  | -1.5232516 | 2.8603236  |
| Pt | 0.0000000  | 0.0000000  | 1.8025656  |
| I  | -0.0000000 | 0.0000000  | -1.4929152 |
| C  | -0.0000000 | 0.0000000  | -3.5828168 |
| C  | 0.0000000  | 1.1896376  | -4.2957812 |

|   |            |            |            |
|---|------------|------------|------------|
| C | 0.0000000  | -1.1896376 | -4.2957812 |
| C | -0.0000000 | 1.1988060  | -5.6813380 |
| F | -0.0000000 | 2.3573758  | -3.6674856 |
| C | -0.0000000 | -1.1988060 | -5.6813380 |
| F | -0.0000000 | -2.3573758 | -3.6674856 |
| C | -0.0000000 | 0.0000000  | -6.3751818 |
| F | 0.0000000  | 2.3440847  | -6.3484235 |
| F | 0.0000000  | -2.3440847 | -6.3484235 |
| F | 0.0000000  | 0.0000000  | -7.6979710 |

**20B:C<sub>6</sub>F<sub>5</sub>I**

|   |            |            |           |
|---|------------|------------|-----------|
| C | 3.1217154  | -1.2270377 | 1.7821414 |
| H | 3.7479003  | -2.1115949 | 1.7884598 |
| C | 3.7864389  | 0.0000000  | 1.7269888 |
| C | 3.1217154  | 1.2270377  | 1.7821414 |
| H | 3.7479003  | 2.1115949  | 1.7884598 |
| C | -3.1217154 | 1.2270377  | 1.7821414 |
| H | -3.7479003 | 2.1115949  | 1.7884598 |
| C | -3.7864389 | 0.0000000  | 1.7269888 |
| C | -3.1217154 | -1.2270377 | 1.7821414 |
| H | -3.7479003 | -2.1115949 | 1.7884598 |
| N | -5.1891076 | 0.0000000  | 1.6126117 |
| N | 5.1891076  | 0.0000000  | 1.6126117 |
| C | -5.8972057 | -1.2205493 | 1.9088727 |
| H | -5.6983585 | -1.6072633 | 2.9209204 |
| H | -6.9663237 | -1.0342834 | 1.8233906 |
| H | -5.6576353 | -2.0079882 | 1.1887076 |
| C | -5.8972057 | 1.2205493  | 1.9088727 |
| H | -5.6576353 | 2.0079882  | 1.1887076 |
| H | -6.9663237 | 1.0342834  | 1.8233906 |
| H | -5.6983585 | 1.6072633  | 2.9209204 |
| C | 5.8972057  | 1.2205493  | 1.9088727 |
| H | 5.6983585  | 1.6072633  | 2.9209204 |
| H | 6.9663237  | 1.0342834  | 1.8233906 |
| H | 5.6576353  | 2.0079882  | 1.1887076 |

|    |            |            |            |
|----|------------|------------|------------|
| C  | 5.8972057  | -1.2205493 | 1.9088727  |
| H  | 5.6576353  | -2.0079882 | 1.1887076  |
| H  | 6.9663237  | -1.0342834 | 1.8233906  |
| H  | 5.6983585  | -1.6072633 | 2.9209204  |
| Pt | 0.0000000  | 0.0000000  | 1.8235096  |
| S  | -1.5268778 | -1.6961716 | 1.8375093  |
| S  | -1.5268778 | 1.6961716  | 1.8375093  |
| S  | 1.5268778  | -1.6961716 | 1.8375093  |
| S  | 1.5268778  | 1.6961716  | 1.8375093  |
| I  | 0.0000000  | 0.0000000  | -1.6963809 |
| C  | 0.0000000  | 0.0000000  | -3.7793039 |
| C  | 0.0000000  | -1.1899492 | -4.4925404 |
| C  | -0.0000000 | 1.1899492  | -4.4925404 |
| C  | 0.0000000  | -1.1986464 | -5.8780075 |
| F  | -0.0000000 | -2.3573379 | -3.8645211 |
| C  | 0.0000000  | 1.1986464  | -5.8780075 |
| F  | 0.0000000  | 2.3573379  | -3.8645211 |
| C  | 0.0000000  | 0.0000000  | -6.5720541 |
| F  | 0.0000000  | -2.3439112 | -6.5449657 |
| F  | 0.0000000  | 2.3439112  | -6.5449657 |
| F  | 0.0000000  | 0.0000000  | -7.8949091 |

**21A:C<sub>6</sub>F<sub>5</sub>I**

|   |            |            |            |
|---|------------|------------|------------|
| C | 2.5971017  | -1.2145166 | -1.5955126 |
| H | 3.1888274  | -2.1311878 | -1.5831904 |
| C | 3.2793009  | -0.0000000 | -1.5076418 |
| C | 2.5971017  | 1.2145166  | -1.5955126 |
| H | 3.1888274  | 2.1311878  | -1.5831904 |
| O | 1.3553531  | -1.4405186 | -1.6969761 |
| O | 1.3553531  | 1.4405186  | -1.6969761 |
| C | -2.5971017 | 1.2145166  | -1.5955126 |
| H | -3.1888274 | 2.1311878  | -1.5831904 |
| C | -3.2793009 | -0.0000000 | -1.5076418 |
| C | -2.5971017 | -1.2145166 | -1.5955126 |
| H | -3.1888274 | -2.1311878 | -1.5831904 |

|    |            |            |            |
|----|------------|------------|------------|
| O  | -1.3553531 | 1.4405186  | -1.6969761 |
| O  | -1.3553531 | -1.4405186 | -1.6969761 |
| C  | -4.8120276 | -0.0000000 | -1.4137091 |
| C  | 4.8120276  | 0.0000000  | -1.4137091 |
| C  | -5.3234228 | 1.2308701  | -0.6577546 |
| H  | -5.1568429 | 2.1614052  | -1.2038839 |
| H  | -6.4021153 | 1.1443651  | -0.5085169 |
| H  | -4.8508342 | 1.3187321  | 0.3237422  |
| C  | -5.3234228 | -1.2308701 | -0.6577546 |
| H  | -6.4021153 | -1.1443651 | -0.5085169 |
| H  | -5.1568429 | -2.1614052 | -1.2038839 |
| H  | -4.8508342 | -1.3187321 | 0.3237422  |
| C  | -5.4089427 | -0.0000000 | -2.8248062 |
| H  | -6.5021847 | 0.0000000  | -2.7865514 |
| H  | -5.0881622 | 0.8827117  | -3.3840412 |
| H  | -5.0881622 | -0.8827117 | -3.3840412 |
| C  | 5.4089427  | 0.0000000  | -2.8248062 |
| H  | 5.0881622  | 0.8827117  | -3.3840412 |
| H  | 6.5021847  | 0.0000000  | -2.7865514 |
| H  | 5.0881622  | -0.8827117 | -3.3840412 |
| C  | 5.3234228  | 1.2308701  | -0.6577546 |
| H  | 6.4021153  | 1.1443651  | -0.5085169 |
| H  | 5.1568429  | 2.1614052  | -1.2038839 |
| H  | 4.8508342  | 1.3187321  | 0.3237422  |
| C  | 5.3234228  | -1.2308701 | -0.6577546 |
| H  | 4.8508342  | -1.3187321 | 0.3237422  |
| H  | 5.1568429  | -2.1614052 | -1.2038839 |
| H  | 6.4021153  | -1.1443651 | -0.5085169 |
| Pt | 0.0000000  | 0.0000000  | -1.6973561 |
| I  | 0.0000000  | 0.0000000  | 1.5638839  |
| C  | 0.0000000  | 0.0000000  | 3.6545635  |
| C  | -0.0000000 | -1.1897050 | 4.3669807  |
| C  | -0.0000000 | 1.1897050  | 4.3669807  |
| C  | -0.0000000 | -1.1989786 | 5.7524835  |
| F  | 0.0000000  | -2.3571670 | 3.7380360  |

|   |            |            |           |
|---|------------|------------|-----------|
| C | -0.0000000 | 1.1989786  | 5.7524835 |
| F | 0.0000000  | 2.3571670  | 3.7380360 |
| C | 0.0000000  | 0.0000000  | 6.4462162 |
| F | 0.0000000  | -2.3441310 | 6.4194209 |
| F | 0.0000000  | 2.3441310  | 6.4194209 |
| F | -0.0000000 | 0.0000000  | 7.7688007 |

**21B:C<sub>6</sub>F<sub>5</sub>I**

|   |            |            |            |
|---|------------|------------|------------|
| C | -3.1149246 | 1.2236644  | -1.5118504 |
| H | -3.7500019 | 2.1039988  | -1.5197069 |
| C | -3.7727885 | 0.0000000  | -1.5062830 |
| C | -3.1149246 | -1.2236644 | -1.5118504 |
| H | -3.7500019 | -2.1039988 | -1.5197069 |
| C | 3.1149246  | -1.2236644 | -1.5118504 |
| H | 3.7500019  | -2.1039988 | -1.5197069 |
| C | 3.7727885  | 0.0000000  | -1.5062830 |
| C | 3.1149246  | 1.2236644  | -1.5118504 |
| H | 3.7500019  | 2.1039988  | -1.5197069 |
| C | 5.3129236  | 0.0000000  | -1.5932318 |
| C | -5.3129236 | 0.0000000  | -1.5932318 |
| C | 5.9210112  | -1.2305730 | -0.9140445 |
| H | 5.6927428  | -2.1604832 | -1.4385431 |
| H | 7.0091559  | -1.1383841 | -0.9053994 |
| H | 5.5801721  | -1.3252190 | 0.1198529  |
| C | 5.9210112  | 1.2305730  | -0.9140445 |
| H | 7.0091559  | 1.1383841  | -0.9053994 |
| H | 5.6927428  | 2.1604832  | -1.4385431 |
| H | 5.5801721  | 1.3252190  | 0.1198529  |
| C | 5.7081252  | -0.0000000 | -3.0739830 |
| H | 6.7964154  | 0.0000000  | -3.1848776 |
| H | 5.3132626  | -0.8827827 | -3.5828611 |
| H | 5.3132626  | 0.8827827  | -3.5828611 |
| C | -5.7081252 | 0.0000000  | -3.0739830 |
| H | -5.3132626 | -0.8827827 | -3.5828611 |
| H | -6.7964154 | 0.0000000  | -3.1848776 |

|    |            |            |            |
|----|------------|------------|------------|
| H  | -5.3132626 | 0.8827827  | -3.5828611 |
| C  | -5.9210112 | -1.2305730 | -0.9140445 |
| H  | -7.0091559 | -1.1383841 | -0.9053994 |
| H  | -5.6927428 | -2.1604832 | -1.4385431 |
| H  | -5.5801721 | -1.3252190 | 0.1198529  |
| C  | -5.9210112 | 1.2305730  | -0.9140445 |
| H  | -5.5801721 | 1.3252190  | 0.1198529  |
| H  | -5.6927428 | 2.1604832  | -1.4385431 |
| H  | -7.0091559 | 1.1383841  | -0.9053994 |
| Pt | 0.0000000  | 0.0000000  | -1.5085409 |
| S  | 1.5240963  | -1.7045744 | -1.5128426 |
| S  | 1.5240963  | 1.7045744  | -1.5128426 |
| S  | -1.5240963 | 1.7045744  | -1.5128426 |
| S  | -1.5240963 | -1.7045744 | -1.5128426 |
| I  | 0.0000000  | 0.0000000  | 2.0136056  |
| C  | 0.0000000  | 0.0000000  | 4.0952176  |
| C  | 0.0000000  | 1.1903718  | 4.8078379  |
| C  | 0.0000000  | -1.1903718 | 4.8078379  |
| C  | 0.0000000  | 1.1988355  | 6.1933695  |
| F  | -0.0000000 | 2.3572681  | 4.1791702  |
| C  | 0.0000000  | -1.1988355 | 6.1933695  |
| F  | -0.0000000 | -2.3572681 | 4.1791702  |
| C  | -0.0000000 | 0.0000000  | 6.8872487  |
| F  | -0.0000000 | 2.3438509  | 6.8601450  |
| F  | -0.0000000 | -2.3438509 | 6.8601450  |
| F  | 0.0000000  | 0.0000000  | 8.2097554  |
